# Supplementary material
Source: publisher figshare collection journal article supplement (https://acs.figshare.com/ndownloader/files/5886768)
Supplement: Supplementary file 1 [file 5886768]

## Sheet: abr_CARDv105_merged_labeled.txt
samples	_3082	_3181	_330A1	_3301.2	_s2101	_131A1	_120A2	_120A1.2	_2181	_2421	_1251	_1404.2	_1403	_120E1	_3031	_s2401	_3441	_3461	_125A1.2	_308A1	_3462	_1402	_125C1	_3182	_2451	_1402.2	_H2411	_3081	_2202	_304A1	_2422	_H2412	_H2412.2	_120A1	_1401	_1202	_120A2.2	_2191	_1252	_2201	_2431	_2192DILUTED1-10	_S2301	_304B1	_B401	_3041	_S2101.2	_2461	Ontologies
gi|10312100|ARO_3002705|floR__Escherichia_coli_	0	0	0	0	0	0	0	0	0	0	0	0	0	0	0	0	0	0	0	0	0	0	0	0	0	0	0	0	0	0	0	0	0	0	0	0	0	0	0	0	0	0	0	0	0	0	0	0	ARO:1000001 ! process or component of antibiotic biology or chemistry|ARO:3000000 ! determinant of antibiotic resistance|ARO:3000159 ! efflux pump conferring antibiotic resistance|ARO:0010002 ! major facilitator superfamily (MFS) antibiotic efflux pump|ARO:3001213 ! chloramphenicol resistance efflux pump
gi|1060876|ARO_3000206|emrK__Escherichia_coli_	0	0	0	0	0	0	0	0	0	0	0	0	0	0	0	0	0	0	0	0	0	0	0	0	0	0	0	0	0	0	0	0	0	0	0	0	0	0	0	0	0	0	0	0	0	0	0	0	ARO:1000001 ! process or component of antibiotic biology or chemistry|ARO:3000000 ! determinant of antibiotic resistance|ARO:3000159 ! efflux pump conferring antibiotic resistance|ARO:3000748 ! subunit of efflux pump conferring antibiotic resistance
gi|1060877|ARO_3000254|emrY__Escherichia_coli_	0	0	0	0	0	0	0	0	0	0	0	0	0	0	0	0	0	0	0	0	0	0	0	0	0	0	0	0	0	0	0	0	0	0	0	0	0	0	0	0	0	0	0	0	0	0	0	0	ARO:1000001 ! process or component of antibiotic biology or chemistry|ARO:3000000 ! determinant of antibiotic resistance|ARO:3000159 ! efflux pump conferring antibiotic resistance|ARO:3000748 ! subunit of efflux pump conferring antibiotic resistance
gi|1061006|ARO_3000449|FomB__Streptomyces_wedmorensis_	0	0	0	0	0	0	0	0	0	0	0	0	0	0	0	0	0	0	0	0	0	0	0	0	0	0	0	0	0	0	0	0	0	0	0	0	0	0	0	0	0	0	0	0	0	0	0	0	ARO:1000001 ! process or component of antibiotic biology or chemistry|ARO:3000000 ! determinant of antibiotic resistance|ARO:3000271 ! fosfomycin resistance gene|ARO:3000342 ! fosfomycin inactivation enzyme|ARO:3000359 ! fosfomycin phosphotransferase
gi|1065722|ARO_3002670|cat__Enterococcus_faecalis_	0	0	0	0	0	0	0	0	0	0	0	0	0	0	0	0	0	0	0	0	0	0	0	0	0	0	0	0	0	0	0	0	0	0	0	0	0	0	0	0	0	0	0	0	0	0	0	0	ARO:1000001 ! process or component of antibiotic biology or chemistry|ARO:3000000 ! determinant of antibiotic resistance|ARO:3000557 ! antibiotic inactivation enzyme|ARO:3000122 ! chloramphenicol acetyltransferase (CAT)
gi|106880084|ARO_3000319|mphC__Staphylococcus_equorum_	0	0	0	0	0	0	0	0	0	0	0	0	0	0	0	0	0	0	0	0	0	0	0	0	0	0	0	0	0	0	0	0	0	0	0	0	0	0	0	0	0	0	0	0	0	0	0	0	ARO:1000001 ! process or component of antibiotic biology or chemistry|ARO:3000000 ! determinant of antibiotic resistance|ARO:3000557 ! antibiotic inactivation enzyme|ARO:3000201 ! macrolide inactivation enzyme|ARO:3000333 ! macrolide phosphotransferase (MPH)
gi|1072327|ARO_3003553|CepS_beta-lactamase__Aeromonas_sobria_	0	0	0	0	0	0	0	0	0	0	0	0	0	0	0	0	0	0	0	0	0	0	0	0	0	0	0	0	0	0	0	0	0	0	0	0	0	0	0	0	0	0	0	0	0	0	0	0	ARO:1000001 ! process or component of antibiotic biology or chemistry|ARO:3000000 ! determinant of antibiotic resistance|ARO:3000129 ! beta-lactam resistance gene|ARO:3000001 ! beta-lactamase|ARO:3000076 ! class C beta-lactamase
gi|110084170|ARO_3002609|aadA9__Corynebacterium_sp__L2-79-05_	0	0	0	0	0	0	0	0	0	0	0	0	0	0	0	0	0	0	0	0	0	0	0	0	0	0	0	0	0	0	0	0	0	0	0	0	0	0	0	0	0	0	0	0	0	0	0	0	ARO:1000001 ! process or component of antibiotic biology or chemistry|ARO:3000000 ! determinant of antibiotic resistance|ARO:3000104 ! aminoglycoside resistance gene|ARO:3000218 ! aminoglycoside nucleotidyltransferase (ANT)|ARO:3000232 ! ANT(3'')-Ia
gi|110350570|ARO_3002585|AAC(6_)-31__Acinetobacter_baumannii_	0	0	0	0	0	0	0	0	0	0	0	0	0	0	0	0	0	0	0	0	0	0	0	0	0	0	0	0	0	0	0	0	0	0	0	0	0	0	0	0	0	0	0	0	0	0	0	0	ARO:1000001 ! process or component of antibiotic biology or chemistry|ARO:3000000 ! determinant of antibiotic resistance|ARO:3000104 ! aminoglycoside resistance gene|ARO:3000121 ! aminoglycoside acetyltransferase (AAC)|ARO:3000345 ! AAC(6')
gi|110611191|ARO_3000207|acrA__Enterobacter_cloacae_	0	0	0	0	0	0	0	0	0	0	0	0	0	0	0	0	0	0	0	0	0	0	0	0	0	0	0	0	0	0	0	0	0	0	0	0	0	0	0	0	0	0	0	0	0	0	0	0	ARO:1000001 ! process or component of antibiotic biology or chemistry|ARO:3000000 ! determinant of antibiotic resistance|ARO:3000159 ! efflux pump conferring antibiotic resistance|ARO:3000748 ! subunit of efflux pump conferring antibiotic resistance
gi|110611192|ARO_3000216|acrB__Enterobacter_cloacae_	0	6.21911	0	0	0	0	0	0	0	0	0	0	0	0	0	0	0	0	0	0	0	0	0	22.3095	0	0	9.31313	0	0	0	0	0	16.1876	0	0	0	0	0	0	0	0	0	0	0	0	0	0	0	ARO:1000001 ! process or component of antibiotic biology or chemistry|ARO:3000000 ! determinant of antibiotic resistance|ARO:3000159 ! efflux pump conferring antibiotic resistance|ARO:3000748 ! subunit of efflux pump conferring antibiotic resistance
gi|11071583|ARO_3003055|smeD__Stenotrophomonas_maltophilia_	0	0	0	0	0	0	0	0	0	0	0	0	0	0	0	0	0	0	0	0	0	0	0	0	0	0	0	0	0	0	0	0	0	0	0	0	0	0	0	0	0	0	0	0	0	0	0	0	ARO:1000001 ! process or component of antibiotic biology or chemistry|ARO:3000000 ! determinant of antibiotic resistance|ARO:3000159 ! efflux pump conferring antibiotic resistance|ARO:3000748 ! subunit of efflux pump conferring antibiotic resistance
gi|11071584|ARO_3003056|smeE__Stenotrophomonas_maltophilia_	0	0	0	0	0	0	0	0	0	0	0	0	0	0	0	0	0	0	0	0	0	0	0	0	0	0	0	0	0	0	0	0	0	2.87483	0	0	0	0	0	0	0	0	0	0	0	0	0	0	ARO:1000001 ! process or component of antibiotic biology or chemistry|ARO:3000000 ! determinant of antibiotic resistance|ARO:3000159 ! efflux pump conferring antibiotic resistance|ARO:3000748 ! subunit of efflux pump conferring antibiotic resistance
gi|11071585|ARO_3003057|smeF__Stenotrophomonas_maltophilia_	0	0	0	0	0	0	0	0	0	0	0	0	0	0	0	0	1.54158	0	0	0	0	0	0	0	1.08033	0	0	0	0	0	0	0	0	0	0	0	0	0	1.10836	0	0	0	0	0	0	0	0	0	ARO:1000001 ! process or component of antibiotic biology or chemistry|ARO:3000000 ! determinant of antibiotic resistance|ARO:3000159 ! efflux pump conferring antibiotic resistance|ARO:3000748 ! subunit of efflux pump conferring antibiotic resistance
gi|110816356|ARO_3002860|dfrA17__Pseudomonas_aeruginosa_	0	0	0	0	0	0	0	0	0	0	0	0	0	0	0	0	0	0	0	0	0	0	0	0	0	0	0	0	0	0	0	0	0	0	0	0	0	0	0	0	0	0	0	0	0	0	0	0	ARO:1000001 ! process or component of antibiotic biology or chemistry|ARO:3000000 ! determinant of antibiotic resistance|ARO:3001217 ! trimethoprim resistance gene|ARO:3001218 ! trimethoprim resistant dihydrofolate reductase dfr
gi|11095254|ARO_3002380|SME-2__Serratia_marcescens_	0	0	0	0	0	0	0	0	0	0	0	0	0	0	0	0	0	0	0	0	0	0	0	0	0	0	0	0	0	0	0	0	0	0	0	0	0	0	0	0	0	0	0	0	0	0	0	0	ARO:1000001 ! process or component of antibiotic biology or chemistry|ARO:3000000 ! determinant of antibiotic resistance|ARO:3000129 ! beta-lactam resistance gene|ARO:3000001 ! beta-lactamase|ARO:3000078 ! class A beta-lactamase|ARO:3000055 ! SME beta-lactamase
gi|11096456|ARO_3002260|IND-4__Chryseobacterium_indologenes_	0	0	0	0	0	0	0	0	0	0	0	0	0	0	0	0	0	0	0	0	0	0	0	0	0	0	0	0	0	0	0	0	0	0	0	0	0	0	0	0	0	0	0	0	0	0	0	0	ARO:1000001 ! process or component of antibiotic biology or chemistry|ARO:3000000 ! determinant of antibiotic resistance|ARO:3000129 ! beta-lactam resistance gene|ARO:3000001 ! beta-lactamase|ARO:3000004 ! class B (metallo-) beta-lactamase|ARO:3000568 ! subclass B1 (metallo-) beta-lactamase|ARO:3000060 ! IND beta-lactamase
gi|111548603|ARO_3002699|cmlB1__Bordetella_bronchiseptica_	0	0	0	0	0	0	0	0	0	0	0	0	0	0	0	0	0	0	0	0	0	0	0	0	0	0	0	0	0	0	0	0	0	0	0	0	0	0	0	0	0	0	0	0	0	0	0	0	ARO:1000001 ! process or component of antibiotic biology or chemistry|ARO:3000000 ! determinant of antibiotic resistance|ARO:3000159 ! efflux pump conferring antibiotic resistance|ARO:0010002 ! major facilitator superfamily (MFS) antibiotic efflux pump|ARO:3001213 ! chloramphenicol resistance efflux pump
gi|111608744|ARO_3002830|vgaALC__Staphylococcus_haemolyticus_	0	0	0	0	0	0	0	1.43331	0	0	2.91182	0	0	0	0	0	0	0	0	0	0	0	0	0	0	0	0	0	0	0	3.99357	0	0	0	0	3.29525	0	0	3.95844	0	0	0	0	0	0	0	0	0	ARO:1000001 ! process or component of antibiotic biology or chemistry|ARO:3000000 ! determinant of antibiotic resistance|ARO:3000240 ! streptogramin resistance gene|ARO:3000131 ! streptogramin resistance efflux pump|ARO:3000113 ! vga
gi|11345400|ARO_3002956|vanYB__Enterococcus_faecium_	0	0	0	0	0	0	0	0	0	0	0	0	0	0	0	0	0	0	0	0	0	0	0	0	0	0	0	0	0	0	0	0	0	0	0	0	0	0	0	0	0	0	0	0	0	0	0	0	ARO:1000001 ! process or component of antibiotic biology or chemistry|ARO:3000000 ! determinant of antibiotic resistance|ARO:3000012 ! gene conferring antibiotic resistance via molecular bypass|ARO:3002976 ! gene associated with a glycopeptide resistance cluster|ARO:3000077 ! vanY
gi|11345402|ARO_3002943|vanHB__Enterococcus_faecium_	0	0	0	0	0	0	0	0	0	0	0	0	0	0	0	0	0	0	0	0	0	0	0	0	0	0	0	0	0	0	0	0	0	0	0	0	0	0	0	0	0	0	0	0	0	0	0	0	ARO:1000001 ! process or component of antibiotic biology or chemistry|ARO:3000000 ! determinant of antibiotic resistance|ARO:3000012 ! gene conferring antibiotic resistance via molecular bypass|ARO:3002976 ! gene associated with a glycopeptide resistance cluster|ARO:3000006 ! vanH
gi|11345446|ARO_3001431|OXA-37__Acinetobacter_baumannii_	0	0	0	0	0	0	0	0	0	0	0	0	0	0	0	0	0	0	0	0	0	0	0	0	0	0	0	0	0	0	0	0	0	0	0	0	0	0	0	0	0	0	0	0	0	0	0	0	ARO:1000001 ! process or component of antibiotic biology or chemistry|ARO:3000000 ! determinant of antibiotic resistance|ARO:3000129 ! beta-lactam resistance gene|ARO:3000001 ! beta-lactamase|ARO:3000075 ! class D beta-lactamase|ARO:3000017 ! OXA beta-lactamase
gi|113706757|ARO_3003109|msrE__Escherichia_coli_	0	0	0	0	0	0	0	0	0	0	0	0	0	0	0	0	0	0	0	0	0	0	0	0	0	0	0	0	0	0	0	0	0	0	0	0	0	0	0	0	0	0	0	0	0	0	0	0	ARO:1000001 ! process or component of antibiotic biology or chemistry|ARO:3000000 ! determinant of antibiotic resistance|ARO:3000315 ! macrolide resistance gene|ARO:3000613 ! macrolide resistance efflux pump
gi|113706803|ARO_3000858|armA__Escherichia_coli_	0	0	0	0	0	0	0	0	0	0	0	0	0	0	0	0	0	0	0	0	0	0	0	0	0	0	0	0	0	0	0	0	0	0	0	0	0	0	0	0	0	0	0	0	0	0	0	0	ARO:1000001 ! process or component of antibiotic biology or chemistry|ARO:3000000 ! determinant of antibiotic resistance|ARO:3000519 ! antibiotic target modifying enzyme|ARO:3000164 ! rRNA methyltransferase conferring antibiotic resistance|ARO:3000857 ! 16S ribosomal RNA methyltransferase
gi|114425697|ARO_3002835|lnuA__Staphylococcus_chromogenes_	0	0	0	0	2.05166	0	1.38617	0	0	0	4.08948	0	4.93609	0	0	3.27056	0	0	0	1.0699	0	2.14709	0	0	0	0	0	0	0	0	1.33119	1.23993	1.40293	0	0	0	0	0	4.31031	3.94569	0	0	0	2.11152	0	0	8.89707	1.71631	ARO:1000001 ! process or component of antibiotic biology or chemistry|ARO:3000000 ! determinant of antibiotic resistance|ARO:3000241 ! lincosamide resistance gene|ARO:3000221 ! lincosamide nucleotidyltransferase (LIN)
gi|1150987|ARO_3002866|dfrD__Listeria_monocytogenes_	0	0	0	0	0	0	0	0	0	0	0	0	0	0	0	0	0	0	0	0	0	0	0	0	0	0	0	0	0	0	0	0	0	0	0	0	0	0	0	0	0	0	0	0	0	0	0	0	ARO:1000001 ! process or component of antibiotic biology or chemistry|ARO:3000000 ! determinant of antibiotic resistance|ARO:3001217 ! trimethoprim resistance gene|ARO:3001218 ! trimethoprim resistant dihydrofolate reductase dfr
gi|115249523|ARO_3000186|tetM__Clostridium_difficile_630_	0	0	0	0	0	0	0	0	0	0	0	0	0	0	0	0	0	0	0	0	0	0	0	0	0	0	0	0	0	0	0	0	0	0	0	0	0	0	0	0	0	0	0	0	0	0	0	0	ARO:1000001 ! process or component of antibiotic biology or chemistry|ARO:3000000 ! determinant of antibiotic resistance|ARO:3000185 ! antibiotic target protection protein|ARO:0000002 ! tetracycline resistance ribosomal protection protein
gi|116000145|ARO_3002857|dfrA26__Escherichia_coli_	0	0	0	0	0	0	0	0	0	0	0	0	0	0	0	0	0	0	0	0	0	0	0	0	0	0	0	0	0	0	0	0	0	0	0	0	0	0	0	0	0	0	0	0	0	0	0	0	ARO:1000001 ! process or component of antibiotic biology or chemistry|ARO:3000000 ! determinant of antibiotic resistance|ARO:3001217 ! trimethoprim resistance gene|ARO:3001218 ! trimethoprim resistant dihydrofolate reductase dfr
gi|117321890|ARO_3002639|APH(3__)-Ib__Pseudomonas_aeruginosa_	0	0	0	0	0	0	0	0	0	0	0.931781	0	0	0	0	0	0	0	0	0	0	0	0	0	0	0	0	0	0	0	0	0	0	0	0	0	0	0	0	0	0	0	0	0	0	0	0	0	ARO:1000001 ! process or component of antibiotic biology or chemistry|ARO:3000000 ! determinant of antibiotic resistance|ARO:3000557 ! antibiotic inactivation enzyme|ARO:3000114 ! aminoglycoside phosphotransferase (APH)|ARO:3000127 ! APH(3'')
gi|1181627|ARO_3002841|vatB__Staphylococcus_aureus_	0	0	0	0	0	0	0	0	0	0	0	0	0	0	0	0	0	0	0	0	0	0	0	0	0	0	0	0	0	0	0	0	0	0	0	0	0	0	0	0	0	0	0	0	0	0	0	0	ARO:1000001 ! process or component of antibiotic biology or chemistry|ARO:3000000 ! determinant of antibiotic resistance|ARO:3000240 ! streptogramin resistance gene|ARO:3000233 ! streptogramin inactivation enzyme|ARO:3000453 ! vat acetyltransferase
gi|11878535|ARO_3002950|vanXB__Enterococcus_faecium_	0	0	0	0	0	0	0	0	0	0	0	0	0	0	0	0	0	0	0	0	0	0	0	0	0	0	0	0	0	0	0	0	0	0	0	0	0	0	0	0	0	0	0	0	0	0	0	0	ARO:1000001 ! process or component of antibiotic biology or chemistry|ARO:3000000 ! determinant of antibiotic resistance|ARO:3000012 ! gene conferring antibiotic resistance via molecular bypass|ARO:3002976 ! gene associated with a glycopeptide resistance cluster|ARO:3000011 ! vanX
gi|1197659|ARO_3003049|rosB__Yersinia_enterocolitica_(type_O_8)_	0	0	0	0	0	0	0	0	0	0	0	0	0	0	0	0	0	0	0	0	0	0	0	0	0	0	0	0	0	0	0	0	0	0	0	0	0	0	0	0	0	0	0	0	0	0	0	0	ARO:1000001 ! process or component of antibiotic biology or chemistry|ARO:3000000 ! determinant of antibiotic resistance|ARO:3002984 ! polymyxin resistance gene|ARO:3003584 ! polymyxin resistance efflux pump
gi|1197660|ARO_3003048|rosA__Yersinia_enterocolitica_(type_O_8)_	0	0	0	0	0	0	0	0	0	0	0	0	0	0	0	0	0	0	0	0	0	0	0	0	0	0	0	0	0	0	0	0	0	0	0	0	0	0	0	0	0	0	0	0	0	0	0	0	ARO:1000001 ! process or component of antibiotic biology or chemistry|ARO:3000000 ! determinant of antibiotic resistance|ARO:3000159 ! efflux pump conferring antibiotic resistance|ARO:0010002 ! major facilitator superfamily (MFS) antibiotic efflux pump
gi|1200113|ARO_3000812|mtrE__Neisseria_gonorrhoeae_	0	0	0	0	0	0	0	0	0	0	0	0	0	0	0	0	0	0	0	0	0	0	0	0	0	0	0	0	0	0	0	0	0	0	0	0	0	0	0	0	0	0	0	0	0	0	0	0	ARO:1000001 ! process or component of antibiotic biology or chemistry|ARO:3000000 ! determinant of antibiotic resistance|ARO:3000159 ! efflux pump conferring antibiotic resistance|ARO:3000748 ! subunit of efflux pump conferring antibiotic resistance
gi|12081903|ARO_3002825|ErmY__Staphylococcus_aureus_	0	0	0	0	0	0	0	0	0	0	0	0	0	0	0	0	0	0	0	0	0	0	0	0	0	0	0	0	0	0	0	0	0	0	0	0	0	0	0	0	0	0	0	0	0	0	0	0	ARO:1000001 ! process or component of antibiotic biology or chemistry|ARO:3000000 ! determinant of antibiotic resistance|ARO:3000315 ! macrolide resistance gene|ARO:3000560 ! Erm 23S ribosomal RNA methyltransferase
gi|1217600|ARO_3002893|tcr3__Streptomyces_aureofaciens_	0	0	0	0	0	0	0	0	0	0	0	0	0	0	0	0	0	0	0	0	0	0	0	0	0	0	0	0	0	0	0	0	0	0	0	0	0	0	0	0	0	0	0	0	0	0	0	0	ARO:1000001 ! process or component of antibiotic biology or chemistry|ARO:3000000 ! determinant of antibiotic resistance|ARO:3000472 ! tetracycline resistance gene|ARO:3000239 ! tetracycline resistance efflux pump
gi|1230606|ARO_3000375|ErmB__Lactobacillus_fermentum_	0	0	0	0	0	0	0	0	0	0	0	0	32.1758	0	0	0	0	0	0	0	0	0	0	0	6.55917	0	0	0	0	0	0	0	0	0	0	0	0	0	0	0	0	0	0	0	0	0	0	0	ARO:1000001 ! process or component of antibiotic biology or chemistry|ARO:3000000 ! determinant of antibiotic resistance|ARO:3000315 ! macrolide resistance gene|ARO:3000560 ! Erm 23S ribosomal RNA methyltransferase
gi|124377170|ARO_3003110|catB10__Pseudomonas_aeruginosa_	0	0	0	0	0	0	0	0	0	0	0	0	0	0	0	0	0	0	0	0	0	0	0	0	0	0	0	0	0	0	0	0	0	0	0	0	0	0	0	0	0	0	0	0	0	0	0	0	ARO:1000001 ! process or component of antibiotic biology or chemistry|ARO:3000000 ! determinant of antibiotic resistance|ARO:3000557 ! antibiotic inactivation enzyme|ARO:3000122 ! chloramphenicol acetyltransferase (CAT)
gi|1244712|ARO_3002524|AAC(2_)-Ib__Mycobacterium_fortuitum_	0	0	0	0	0	0	0	0	0	0	0	0	0	0	0	0	0	0	0	0	0	0	0	0	0	0	0	0	0	0	0	0	0	0	0	0	0	0	0	0	0	0	0	0	0	0	0	0	ARO:1000001 ! process or component of antibiotic biology or chemistry|ARO:3000000 ! determinant of antibiotic resistance|ARO:3000104 ! aminoglycoside resistance gene|ARO:3000121 ! aminoglycoside acetyltransferase (AAC)|ARO:3000341 ! AAC(2')
gi|125634074|ARO_3001918|CTX-M-56__Escherichia_coli_	0	0	0	0	0	0	0	0	0	0	0	0	0	0	0	0	0	0	0	0	0	0	0	0	0	0	0	0	0	0	0	0	0	0	0	0	0	0	0	0	0	0	0	0	0	0	0	0	ARO:1000001 ! process or component of antibiotic biology or chemistry|ARO:3000000 ! determinant of antibiotic resistance|ARO:3000129 ! beta-lactam resistance gene|ARO:3000001 ! beta-lactamase|ARO:3000078 ! class A beta-lactamase|ARO:3000016 ! CTX-M beta-lactamase
gi|12659044|ARO_3002819|msrC__Enterococcus_faecium_	0	0	0	0	0	0	0	0	0	0	0	0	0	0	0	0	0	0	0	0	0	0	0	0	0	0	0	0	0	0	0	0	0	0	0	0	0	0	0	0	0	0	0	0	0	0	0	0	ARO:1000001 ! process or component of antibiotic biology or chemistry|ARO:3000000 ! determinant of antibiotic resistance|ARO:3000315 ! macrolide resistance gene|ARO:3000613 ! macrolide resistance efflux pump
gi|12751307|ARO_3000604|Erm(35)__Bacteroides_coprosuis_DSM_18011_	0	0	0	0	0	0	0	0	0	0	0	0	0	0	0	0	0	0	0	0	0	0	0	0	0	0	0	0	0	0	0	0	0	0	0	0	0	0	0	0	0	0	0	0	0	0	0	0	ARO:1000001 ! process or component of antibiotic biology or chemistry|ARO:3000000 ! determinant of antibiotic resistance|ARO:3000315 ! macrolide resistance gene|ARO:3000560 ! Erm 23S ribosomal RNA methyltransferase
gi|13274146|ARO_3000851|THIN-B_beta-lactamase__Janthinobacterium_lividum_	0	0	0	0	0	0	0	0	0	0	0	0	0	0	0	0	0	0	0	0	0	0	0	0	0	0	0	0	0	0	0	0	0	0	0	0	0	0	0	0	0	0	0	0	0	0	0	0	ARO:1000001 ! process or component of antibiotic biology or chemistry|ARO:3000000 ! determinant of antibiotic resistance|ARO:3000129 ! beta-lactam resistance gene|ARO:3000001 ! beta-lactamase|ARO:3000004 ! class B (metallo-) beta-lactamase|ARO:3000571 ! subclass B3 (metallo-) beta-lactamase
gi|13447419|ARO_3002583|AAC(6_)-29a__Pseudomonas_aeruginosa_	0	0	0	0	0	0	0	0	0	0	0	0	0	0	0	0	0	0	0	0	0	0	0	0	0	0	0	0	0	0	0	0	0	0	0	0	0	0	0	0	0	0	0	0	0	0	0	0	ARO:1000001 ! process or component of antibiotic biology or chemistry|ARO:3000000 ! determinant of antibiotic resistance|ARO:3000104 ! aminoglycoside resistance gene|ARO:3000121 ! aminoglycoside acetyltransferase (AAC)|ARO:3000345 ! AAC(6')
gi|13539601|ARO_3001424|OXA-29__Fluoribacter_gormanii_	0	0	0	0	0	0	0	0	0	0	0	0	0	0	0	0	0	0	0	0	0	0	0	0	0	0	0	0	0	0	0	0	0	0	0	0	0	0	0	0	0	0	0	0	0	0	0	0	ARO:1000001 ! process or component of antibiotic biology or chemistry|ARO:3000000 ! determinant of antibiotic resistance|ARO:3000129 ! beta-lactam resistance gene|ARO:3000001 ! beta-lactamase|ARO:3000075 ! class D beta-lactamase|ARO:3000017 ! OXA beta-lactamase
gi|13655509|ARO_3000481|tet35__Vibrio_harveyi_	0	0	0	0	0	0	0	0	0	0	0	0	0	0	0	0	0	0	0	0	0	0	0	0	0	0	0	0	0	0	0	0	0	0	0	0	0	0	0	0	0	0	0	0	0	0	0	0	ARO:1000001 ! process or component of antibiotic biology or chemistry|ARO:3000000 ! determinant of antibiotic resistance|ARO:3000472 ! tetracycline resistance gene|ARO:3000239 ! tetracycline resistance efflux pump
gi|1399757|ARO_3000800|mexC__Pseudomonas_aeruginosa_	0	0	0	0	0	0	0	0	0	0	0	0	0	0	0	0	0	0	0	0	0	0	0	0	0	0	0	0	0	0	0	0	0	0	0	0	0	0	0	0	0	0	0	0	0	0	0	0	ARO:1000001 ! process or component of antibiotic biology or chemistry|ARO:3000000 ! determinant of antibiotic resistance|ARO:3000159 ! efflux pump conferring antibiotic resistance|ARO:3000748 ! subunit of efflux pump conferring antibiotic resistance
gi|1399758|ARO_3000801|mexD__Pseudomonas_aeruginosa_	0	0	0	0	0	0	0	0	0	0	0	0	0	0	0	0	0	0	0	0	0	0	0	0	0	0	0	0	0	0	0	0	0	0	0	0	0	0	0	0	0	0	0	0	0	0	0	0	ARO:1000001 ! process or component of antibiotic biology or chemistry|ARO:3000000 ! determinant of antibiotic resistance|ARO:3000159 ! efflux pump conferring antibiotic resistance|ARO:3000748 ! subunit of efflux pump conferring antibiotic resistance
gi|1399759|ARO_3000802|oprJ__Pseudomonas_aeruginosa_	0	0	0	0	0	0	0	0	0	0	0	0	0	0	0	0	0	0	0	0	0	0	0	0	0	0	0	0	0	0	0	0	0	0	0	0	0	0	0	0	0	0	0	0	0	0	0	0	ARO:1000001 ! process or component of antibiotic biology or chemistry|ARO:3000000 ! determinant of antibiotic resistance|ARO:3000159 ! efflux pump conferring antibiotic resistance|ARO:3000748 ! subunit of efflux pump conferring antibiotic resistance
gi|14020999|ARO_3001209|mecC__Staphylococcus_aureus_	0	0	0	0	0	0	0	0	0	0	0	0	0	0	0	0	0	0	0	0	0	0	0	0	0	0	0	0	0	0	0	0	0	0	0	0	0	0	0	0	0	0	0	0	0	0	0	0	ARO:1000001 ! process or component of antibiotic biology or chemistry|ARO:3000000 ! determinant of antibiotic resistance|ARO:3000381 ! antibiotic target replacement protein|ARO:3003040 ! beta-lactam resistant penicillin-binding proteins|ARO:3001208 ! methicillin resistant PBP2
gi|142204|ARO_3000594|ErmR__Arthrobacter_sp__	0	0	0	0	0	0	0	0	0	0	0	0	0	0	0	0	0	0	0	0	0	0	0	0	0	0	0	0	0	0	0	0	0	0	0	0	0	0	0	0	0	0	0	0	0	0	0	0	ARO:1000001 ! process or component of antibiotic biology or chemistry|ARO:3000000 ! determinant of antibiotic resistance|ARO:3000315 ! macrolide resistance gene|ARO:3000560 ! Erm 23S ribosomal RNA methyltransferase
gi|142220|ARO_3002670|cat__Agrobacterium_tumefaciens_str__C58_	0	0	0	0	0	0	0	0	0	0	0	0	0	0	0	0	0	0	0	0	0	0	0	0	0	0	0	0	0	0	0	0	0	0	0	0	0	0	0	0	0	0	0	0	0	0	0	0	ARO:1000001 ! process or component of antibiotic biology or chemistry|ARO:3000000 ! determinant of antibiotic resistance|ARO:3000557 ! antibiotic inactivation enzyme|ARO:3000122 ! chloramphenicol acetyltransferase (CAT)
gi|142606|ARO_3003007|bmr__Bacillus_subtilis_	0	0	0	0	0	0	0	0	0	0	0	0	0	0	0	0	0	0	0	0	0	0	0	0	0	0	0	0	0	0	0	0	0	0	0	0	0	0	0	0	0	0	0	0	0	0	0	0	ARO:1000001 ! process or component of antibiotic biology or chemistry|ARO:3000000 ! determinant of antibiotic resistance|ARO:3000159 ! efflux pump conferring antibiotic resistance|ARO:0010002 ! major facilitator superfamily (MFS) antibiotic efflux pump
gi|142635|ARO_3002672|cat86__Bacillus_pumilus_	0	0	0	0	0	0	0	0	0	0	0	0	0	0	0	0	0	0	0	0	0	0	0	0	0	0	0	0	0	0	0	0	0	0	0	0	0	0	0	0	0	0	0	0	0	0	0	0	ARO:1000001 ! process or component of antibiotic biology or chemistry|ARO:3000000 ! determinant of antibiotic resistance|ARO:3000557 ! antibiotic inactivation enzyme|ARO:3000122 ! chloramphenicol acetyltransferase (CAT)
gi|14278993|ARO_3002870|tet34__Vibrio_sp__No_6_	0	0	0	0	0	0	0	0	0	0	0	0	0	0	0	0	0	0	0	0	0	0	0	0	0	0	0	0	0	0	0	0	0	0	0	0	0	0	0	0	0	0	0	0	0	0	0	0	ARO:1000001 ! process or component of antibiotic biology or chemistry|ARO:3000000 ! determinant of antibiotic resistance|ARO:3000012 ! gene conferring antibiotic resistance via molecular bypass
gi|142884|ARO_3000522|ErmG__Lysinibacillus_sphaericus_	0	0	0	0	0	0	0	0	0	0	0	0	0	0	0	0	0	0	0	0	0	0	0	0	0	0	0	0	0	0	0	0	0	0	0	0	0	0	0	0	0	0	0	0	0	0	0	0	ARO:1000001 ! process or component of antibiotic biology or chemistry|ARO:3000000 ! determinant of antibiotic resistance|ARO:3000315 ! macrolide resistance gene|ARO:3000560 ! Erm 23S ribosomal RNA methyltransferase
gi|143128|ARO_3002878|BcII__Bacillus_cereus_	0	0	0	0	0	0	0	0	0	0	0	0	0	0	0	0	0	0	0	0	0	0	0	0	0	0	0	0	0	0	0	0	0	0	0	0	0	0	0	0	0	0	0	0	0	0	0	0	ARO:1000001 ! process or component of antibiotic biology or chemistry|ARO:3000000 ! determinant of antibiotic resistance|ARO:3000129 ! beta-lactam resistance gene|ARO:3000001 ! beta-lactamase|ARO:3000004 ! class B (metallo-) beta-lactamase|ARO:3000568 ! subclass B1 (metallo-) beta-lactamase|ARO:3000577 ! Bc beta-lactamase
gi|143195|ARO_3000495|ErmD__Bacillus_licheniformis_	0	0	0	0	0	0	0	0	0	0	0	0	0	0	0	0	0	0	0	0	0	0	0	0	0	0	0	0	0	0	0	0	0	0	0	0	0	0	0	0	0	0	0	0	0	0	0	0	ARO:1000001 ! process or component of antibiotic biology or chemistry|ARO:3000000 ! determinant of antibiotic resistance|ARO:3000315 ! macrolide resistance gene|ARO:3000560 ! Erm 23S ribosomal RNA methyltransferase
gi|14326193|ARO_3003014|dfrA16__Escherichia_coli_	0	0	0	0	0	0	0	0	0	0	0	0	0	0	0	0	0	0	0	0	0	0	0	0	0	0	0	0	0	0	0	0	0	0	0	0	0.607412	0	0	0	0	0	0	0	0	0	0	0	ARO:1000001 ! process or component of antibiotic biology or chemistry|ARO:3000000 ! determinant of antibiotic resistance|ARO:3001217 ! trimethoprim resistance gene|ARO:3001218 ! trimethoprim resistant dihydrofolate reductase dfr
gi|143739|ARO_3000179|tetL__Geobacillus_stearothermophilus_	0	0	0	0	0	0	0	0	0	0	0	0	0	0	0	0	0	0	0	0	0	0	0	0	0	0	0	0	0	0	0	0	0	0	0	0	0	0	0	0	0	0	0	0	0	0	0	4.29077	ARO:1000001 ! process or component of antibiotic biology or chemistry|ARO:3000000 ! determinant of antibiotic resistance|ARO:3000472 ! tetracycline resistance gene|ARO:3000239 ! tetracycline resistance efflux pump
gi|143932|ARO_3000578|CcrA_beta-lactamase__Bacteroides_fragilis_	0	0	0	0	0	0	0	0	0	0	0	0	0	0	0	0	0	0	0	0	0	0	0	0	0	0	0	0	0	0	0	0	0	0	0	0	0	0	0	0	0	0	0	0	0	0	0	0	ARO:1000001 ! process or component of antibiotic biology or chemistry|ARO:3000000 ! determinant of antibiotic resistance|ARO:3000129 ! beta-lactam resistance gene|ARO:3000001 ! beta-lactamase|ARO:3000004 ! class B (metallo-) beta-lactamase|ARO:3000568 ! subclass B1 (metallo-) beta-lactamase
gi|144187|ARO_3002654|APH(3_)-VIIa__Campylobacter_jejuni_	0	0	0	0	0	0	0	0	0	0	0	0	0	0	0	0	0	0	0	0	0	0	0	0	0	0	0	0	0	0	0	0	0	0	0	0	0	0	0	0	0	0	0	0	0	0	0	0	ARO:1000001 ! process or component of antibiotic biology or chemistry|ARO:3000000 ! determinant of antibiotic resistance|ARO:3000557 ! antibiotic inactivation enzyme|ARO:3000114 ! aminoglycoside phosphotransferase (APH)|ARO:3000126 ! APH(3')
gi|144189|ARO_3002670|cat__Campylobacter_coli_	0	0	0	0	0	0	0	0	0	0	0	0	0	0	0	0	0	0	0	0	0	0	0	0	0	0	0	0	0	0	0	0	0	0	0	0	0	0	0	0	0	0	0	0	0	0	0	0	ARO:1000001 ! process or component of antibiotic biology or chemistry|ARO:3000000 ! determinant of antibiotic resistance|ARO:3000557 ! antibiotic inactivation enzyme|ARO:3000122 ! chloramphenicol acetyltransferase (CAT)
gi|144215|ARO_3000190|tetO__Campylobacter_jejuni_	0	0	0	0	0	0	0	0	0	0	0	0	2.32997	0	0	0	0	0	0	0	0	0	0	0	5.5097	0	0	0	0	0	0	0	0	0	0	0	0	0	2.07818	0	0	0	0	2.33652	0	0	0	0	ARO:1000001 ! process or component of antibiotic biology or chemistry|ARO:3000000 ! determinant of antibiotic resistance|ARO:3000185 ! antibiotic target protection protein|ARO:0000002 ! tetracycline resistance ribosomal protection protein
gi|14422287|ARO_3000196|tet32__Clostridiaceae_bacterium_K10_	0	0	0	0	0	0	0	0	0	1.32375	0	0	0	0	0	0	0	0	0	0	0	0	0	0	0	0	0	0	0	0	0	0	0	0	0	0	0	0	0	0	0	0	0	0	0	0	0	0	ARO:1000001 ! process or component of antibiotic biology or chemistry|ARO:3000000 ! determinant of antibiotic resistance|ARO:3000185 ! antibiotic target protection protein|ARO:0000002 ! tetracycline resistance ribosomal protection protein
gi|144744|ARO_3002687|catQ__Clostridium_perfringens_	0	0	0	0	0	0	0	0	0	0	0	0	0	0	0	0	0	0	0	0	0	0	0	0	0	0	0	0	0	0	0	0	0	0	0	0	0	0	0	0	0	0	0	0	0	0	0	0	ARO:1000001 ! process or component of antibiotic biology or chemistry|ARO:3000000 ! determinant of antibiotic resistance|ARO:3000557 ! antibiotic inactivation enzyme|ARO:3000122 ! chloramphenicol acetyltransferase (CAT)
gi|14485642|ARO_3002635|APH(2__)-IIa__Escherichia_coli_	0	0	0	0	0	0	0	0	0	0	0	0	0	0	0	0	0	0	0	0	0	0	0	0	0	0	0	0	0	0	0	0	0	0	0	0	0	0	0	0	0	0	0	0	0	0	0	0	ARO:1000001 ! process or component of antibiotic biology or chemistry|ARO:3000000 ! determinant of antibiotic resistance|ARO:3000557 ! antibiotic inactivation enzyme|ARO:3000114 ! aminoglycoside phosphotransferase (APH)|ARO:3000128 ! APH(2'')
gi|14485643|ARO_3002559|AAC(6_)-Ip__Escherichia_coli_	0	0	0	0	0	0	0	0	0	0	0	0	0	0	0	0	0	0	0	0	0	0	0	0	0	0	0	0	0	0	0	0	0	0	0	0	0	0	0	0	0	0	0	0	0	0	0	0	ARO:1000001 ! process or component of antibiotic biology or chemistry|ARO:3000000 ! determinant of antibiotic resistance|ARO:3000104 ! aminoglycoside resistance gene|ARO:3000121 ! aminoglycoside acetyltransferase (AAC)|ARO:3000345 ! AAC(6')
gi|14486653|ARO_3003561|Sed1_beta-lactamase__Citrobacter_sedlakii_	0	0	0	0	0	0	0	0	0	0	0	0	0	0	0	0	0	0	0	0	0	0	0	0	0	0	0	0	0	0	0	0	0	0	0	0	0	0	0	0	0	0	0	0	0	0	0	0	ARO:1000001 ! process or component of antibiotic biology or chemistry|ARO:3000000 ! determinant of antibiotic resistance|ARO:3000129 ! beta-lactam resistance gene|ARO:3000001 ! beta-lactamase|ARO:3000078 ! class A beta-lactamase
gi|148266477|ARO_3000215|mecR1__Staphylococcus_aureus_subsp__aureus_JH9_	0	0	0	0	0	0	0	0	0	0	0	0	0	0	0	0	0	0	0	0	0	0	0	0	0	0	0	0	0	0	0	0	0	0	0	0	0	0	0	0	0	0	0	0	0	0	0	0	ARO:1000001 ! process or component of antibiotic biology or chemistry|ARO:3000000 ! determinant of antibiotic resistance|ARO:3000100 ! gene modulating beta-lactam resistance
gi|148282726|ARO_3000822|pmrA_efflux_pump__Legionella_pneumophila_str__Corby_	0	0	0	0	0	0	0	0	0	0	0	0	0	0	0	0	0	0	0	0	0	0	0	0	0	0	0	0	0	0	0	0	0	0	0	0	0	0	0	0	0	0	0	0	0	0	0	0	ARO:1000001 ! process or component of antibiotic biology or chemistry|ARO:3000000 ! determinant of antibiotic resistance|ARO:3000159 ! efflux pump conferring antibiotic resistance|ARO:0010002 ! major facilitator superfamily (MFS) antibiotic efflux pump
gi|148325|ARO_3000368|vanC__Enterococcus_gallinarum_	0	0	0	0	0	0	0	0	0	0	0	0	0	0	0	0	0	0	0	0	0	0	0	0	0	0	0	0	0	0	0	0	0	0	0	0	0	0	0	0	0	0	0	0	0	0	0	0	ARO:1000001 ! process or component of antibiotic biology or chemistry|ARO:3000000 ! determinant of antibiotic resistance|ARO:3000012 ! gene conferring antibiotic resistance via molecular bypass|ARO:3002976 ! gene associated with a glycopeptide resistance cluster|ARO:3002906 ! van ligase|ARO:3002979 ! D-Ala-D-Ser ligase
gi|148728|ARO_3000595|ErmT__Plasmid_pGT633_	0	0	0	0	0	0	0	0	0	0	0	0	0	0	0	0	0	0	0	0	0	0	0	0	0	0	0	0	0	0	0	0	0	0	0	0	0	0	0	0	0	0	0	0	0	0	0	0	ARO:1000001 ! process or component of antibiotic biology or chemistry|ARO:3000000 ! determinant of antibiotic resistance|ARO:3000315 ! macrolide resistance gene|ARO:3000560 ! Erm 23S ribosomal RNA methyltransferase
gi|148767761|ARO_3002586|AAC(6_)-32__Pseudomonas_aeruginosa_	0	0	0	0	0	0	0	0	0	0	0	0	0	0	0	0	0	0	0	0	0	0	0	0	0	0	0	0	0	0	0	0	0	0	0	0	0	0	0	0	0	0	0	0	0	0	0	0	ARO:1000001 ! process or component of antibiotic biology or chemistry|ARO:3000000 ! determinant of antibiotic resistance|ARO:3000104 ! aminoglycoside resistance gene|ARO:3000121 ! aminoglycoside acetyltransferase (AAC)|ARO:3000345 ! AAC(6')
gi|148832231|ARO_3002838|lnuD__Streptococcus_uberis_	0	0	0	0	0	0	0	0	0	0	0	0	0	0	0	0	0	0	0	0	0	0	0	0	0	0	0	0	0	0	0	0	0	0	0	0	0	0	0	0	0	0	0	0	0	0	0	0	ARO:1000001 ! process or component of antibiotic biology or chemistry|ARO:3000000 ! determinant of antibiotic resistance|ARO:3000241 ! lincosamide resistance gene|ARO:3000221 ! lincosamide nucleotidyltransferase (LIN)
gi|149875|ARO_3002543|AAC(3)-IXa__Micromonospora_chalcea_	0	0	0	0	0	0	0	0	0	0	0	0	0	0	0	0	0	0	0	0	0	0	0	0	0	0	0	0	0	0	0	0	0	0	0	0	0	0	0	0	0	0	0	0	0	0	0	0	ARO:1000001 ! process or component of antibiotic biology or chemistry|ARO:3000000 ! determinant of antibiotic resistance|ARO:3000104 ! aminoglycoside resistance gene|ARO:3000121 ! aminoglycoside acetyltransferase (AAC)|ARO:3000322 ! AAC(3)
gi|150392517|ARO_3000347|ErmA__Staphylococcus_aureus_subsp__aureus_JH1_	0	0	0	0	0	0	0	0	0	0	0	0	0	0	0	0	0	0	0	0	0	0	0	0	0	0	0	0	0	0	0	0	0	0	0	0	0	0	0	0	0	0	0	0	0	0	0	0	ARO:1000001 ! process or component of antibiotic biology or chemistry|ARO:3000000 ! determinant of antibiotic resistance|ARO:3000315 ! macrolide resistance gene|ARO:3000560 ! Erm 23S ribosomal RNA methyltransferase
gi|150520|ARO_3003105|dfrA3__Plasmid_pAZ1_	0	0	0	0	0	0	0	0	0	0	0	0	0	0	0	0	0	0	0	0	0	0	0	0	0	0	0	0	0	0	0	0	0	0	0	0	0	0	0	0	0	0	0	0	0	0	0	0	ARO:1000001 ! process or component of antibiotic biology or chemistry|ARO:3000000 ! determinant of antibiotic resistance|ARO:3001217 ! trimethoprim resistance gene|ARO:3001218 ! trimethoprim resistant dihydrofolate reductase dfr
gi|150831|ARO_3000250|ErmC__Staphylococcus_epidermidis_	0	0	0	0	0	0	0	0.601988	0	0	0	0	0	0	0	1.1774	0	0	0	0	0	0	0	0	0	0	0	0	0	0	0.958458	0	0	0	0	0	0	2.71878	1.66255	2.8409	0	0	0	0	0	0	0	0	ARO:1000001 ! process or component of antibiotic biology or chemistry|ARO:3000000 ! determinant of antibiotic resistance|ARO:3000315 ! macrolide resistance gene|ARO:3000560 ! Erm 23S ribosomal RNA methyltransferase
gi|150872|ARO_3002545|AAC(6_)-Ia__Plasmid_R_	0	0	0	0	0	0	0	0	0	0	0	0	0	0	0	0	0	0	0	0	0	0	0	0	0	0	0	0	0	0	0	0	0	0	0	0	0	0	0	0	0	0	0	0	0	0	0	0	ARO:1000001 ! process or component of antibiotic biology or chemistry|ARO:3000000 ! determinant of antibiotic resistance|ARO:3000104 ! aminoglycoside resistance gene|ARO:3000121 ! aminoglycoside acetyltransferase (AAC)|ARO:3000345 ! AAC(6')
gi|150883|ARO_3002670|cat__Proteus_mirabilis_	0	0	0	0	0	0	0	0	0	0	0	0	0	0	0	0	0	0	0	0	0	0	0	0	0	0	0	0	0	0	0	0	0	0	0	0	0	0	0	0	0	0	0	0	0	0	0	0	ARO:1000001 ! process or component of antibiotic biology or chemistry|ARO:3000000 ! determinant of antibiotic resistance|ARO:3000557 ! antibiotic inactivation enzyme|ARO:3000122 ! chloramphenicol acetyltransferase (CAT)
gi|150951|ARO_3002595|AAC(6_)-IIb__Pseudomonas_fluorescens_	0	0	0	0	0	0	0	0	0	0	0	0	0	0	0	0	0	0	0	0	0	0	0	0	0	0	0	0	0	0	0	0	0	0	0	0	0	0	0	0	0	0	0	0	0	0	0	0	ARO:1000001 ! process or component of antibiotic biology or chemistry|ARO:3000000 ! determinant of antibiotic resistance|ARO:3000104 ! aminoglycoside resistance gene|ARO:3000121 ! aminoglycoside acetyltransferase (AAC)|ARO:3000345 ! AAC(6')
gi|150956|ARO_3002538|AAC(3)-IIIc__Pseudomonas_aeruginosa_	0	0	0	0	0	0	0	0	0	0	0	0	0	0	0	0	0	0	0	0	0	0	0	0	0	0	0	0	0	0	0	0	0	0	0	0	0	0	0	0	0	0	0	0	0	0	0	0	ARO:1000001 ! process or component of antibiotic biology or chemistry|ARO:3000000 ! determinant of antibiotic resistance|ARO:3000104 ! aminoglycoside resistance gene|ARO:3000121 ! aminoglycoside acetyltransferase (AAC)|ARO:3000322 ! AAC(3)
gi|151028|ARO_3002624|ANT(4_)-IIa__Pseudomonas_aeruginosa_	0	0	0	0	0	0	0	0	0	0	0	0	0	0	0	0	0	0	0	0	0	0	0	0	0	0	0	0	0	0	0	0	0	0	0	0	0	0	0	0	0	0	0	0	0	0	0	0	ARO:1000001 ! process or component of antibiotic biology or chemistry|ARO:3000000 ! determinant of antibiotic resistance|ARO:3000104 ! aminoglycoside resistance gene|ARO:3000218 ! aminoglycoside nucleotidyltransferase (ANT)|ARO:3000229 ! ANT(4')
gi|151221540|ARO_3000838|arlR__Staphylococcus_aureus_subsp__aureus_str__Newman_	0	0	0	0	0	0	0	0	0	0	0	0	0	0	0	0	0	0	0	0	0	0	0	0	0	0	0	0	0	0	0	0	0	0	0	0	0	0	0	0	0	0	0	0	0	0	0	0	ARO:1000001 ! process or component of antibiotic biology or chemistry|ARO:3000000 ! determinant of antibiotic resistance|ARO:3000451 ! gene modulating antibiotic efflux|ARO:3000750 ! subunit of gene modulating antibiotic efflux
gi|15127844|ARO_3002843|vatD__Enterococcus_faecium_	0	0	0	0	0	0	0	0	0	0	0	0	0	0	0	0	0	0	0	0	0	0	0	0	0	0	0	0	0	0	0	0	0	0	0	0	0	0	0	0	0	0	0	0	0	0	0	0	ARO:1000001 ! process or component of antibiotic biology or chemistry|ARO:3000000 ! determinant of antibiotic resistance|ARO:3000240 ! streptogramin resistance gene|ARO:3000233 ! streptogramin inactivation enzyme|ARO:3000453 ! vat acetyltransferase
gi|151803|ARO_3002690|cml__Plasmid_R26_	0	0	0	0	0	0	0	0	0	0	0	0	0	0	0	0	0	0	0	0	0	0	0	0	0	0	0	0	0	0	0	0	0	0	0	0	0	0	0	0	0	0	0	0	0	0	0	0	ARO:1000001 ! process or component of antibiotic biology or chemistry|ARO:3000000 ! determinant of antibiotic resistance|ARO:3000159 ! efflux pump conferring antibiotic resistance|ARO:0010002 ! major facilitator superfamily (MFS) antibiotic efflux pump|ARO:3001213 ! chloramphenicol resistance efflux pump
gi|152143853|ARO_3000841|CGB-1_beta-lactamase__Chryseobacterium_gleum_	0	0	0	0	0	0	0	0	0	0	0	0	0	0	0	0	0	0	0	0	0	0	0	0	0	0	0	0	0	0	0	0	0	0	0	0	0	0	0	0	0	0	0	0	0	0	0	0	ARO:1000001 ! process or component of antibiotic biology or chemistry|ARO:3000000 ! determinant of antibiotic resistance|ARO:3000129 ! beta-lactam resistance gene|ARO:3000001 ! beta-lactamase|ARO:3000004 ! class B (metallo-) beta-lactamase|ARO:3000568 ! subclass B1 (metallo-) beta-lactamase
gi|1524113|ARO_3002012|CMY-1__Klebsiella_pneumoniae_	0	0	0	0	0	0	0	0	0	0	0	0	0	0	0	0	0	0	0	0	0	0	0	0	0	0	0	0	0	0	0	0	0	0	0	0	0	0	0	0	0	0	0	0	0	0	0	0	ARO:1000001 ! process or component of antibiotic biology or chemistry|ARO:3000000 ! determinant of antibiotic resistance|ARO:3000129 ! beta-lactam resistance gene|ARO:3000001 ! beta-lactamase|ARO:3000076 ! class C beta-lactamase|ARO:3000085 ! CMY-LAT-MOX beta-lactamase|ARO:3000087 ! CMY-MOX beta-lactamase|ARO:3000069 ! CMY beta-lactamase
gi|152812|ARO_3002534|AAC(3)-IIb__Serratia_marcescens_	0	0	0	0	0	0	0	0	0	0	0	0	0	0	0	0	0	0	0	0	0	0	0	0	0	0	0	0	0	0	0	0	0	0	0	0	0	0	0	0	0	0	0	0	0	0	0	0	ARO:1000001 ! process or component of antibiotic biology or chemistry|ARO:3000000 ! determinant of antibiotic resistance|ARO:3000104 ! aminoglycoside resistance gene|ARO:3000121 ! aminoglycoside acetyltransferase (AAC)|ARO:3000322 ! AAC(3)
gi|152814|ARO_3002549|AAC(6_)-Ic__Serratia_marcescens_	0	0	0	0	0	0	0	0	0	0	0	0	5.17772	0	0	0	0	0	0	0	0	0	0	0	0	0	0	0	0	0	0	0	0	0	21.3562	0	0	0	0	0	0	0	0	0	0	0	0	0	ARO:1000001 ! process or component of antibiotic biology or chemistry|ARO:3000000 ! determinant of antibiotic resistance|ARO:3000104 ! aminoglycoside resistance gene|ARO:3000121 ! aminoglycoside acetyltransferase (AAC)|ARO:3000345 ! AAC(6')
gi|152938410|ARO_3000784|cmeB__Campylobacter_jejuni_subsp__doylei_269_97_	0	0	0	0	0	0	0	0	0	0	0	0	0	0	0	0	0	0	0	0	0	0	0	0	0	0	0	0	0	0	0	0	0	0	0	0	0	0	0	0	0	0	0	0	0	0	0	0	ARO:1000001 ! process or component of antibiotic biology or chemistry|ARO:3000000 ! determinant of antibiotic resistance|ARO:3000159 ! efflux pump conferring antibiotic resistance|ARO:3000748 ! subunit of efflux pump conferring antibiotic resistance
gi|152939160|ARO_3000783|cmeA__Campylobacter_jejuni_subsp__doylei_269_97_	0	0	0	0	0	0	0	0	0	0	0	0	0	0	0	0	0	0	0	0	0	0	0	0	0	0	0	0	0	0	0	0	0	0	0	0	0	0	0	0	0	0	0	0	0	0	0	0	ARO:1000001 ! process or component of antibiotic biology or chemistry|ARO:3000000 ! determinant of antibiotic resistance|ARO:3000159 ! efflux pump conferring antibiotic resistance|ARO:3000748 ! subunit of efflux pump conferring antibiotic resistance
gi|152982|ARO_3002670|cat__Staphylococcus_aureus_RN4220_	0	0	0	0	0	0	0	0	0	0	0	0	0	0	0	0	0	0	0	0	0	0	0	0	0	0	0	0	0	0	0	0	0	0	0	0	0	0	0	0	0	0	0	0	0	0	0	0	ARO:1000001 ! process or component of antibiotic biology or chemistry|ARO:3000000 ! determinant of antibiotic resistance|ARO:3000557 ! antibiotic inactivation enzyme|ARO:3000122 ! chloramphenicol acetyltransferase (CAT)
gi|153077|ARO_3001307|VgbA__Staphylococcus_aureus_	0	0	0	0	0	0	0	0	0	0	0	0	0	0	0	0	0	0	0	0	0	0	0	0	0	0	0	0	0	0	0	0	0	0	0	0	0	0	0	0	0	0	0	0	0	0	0	0	ARO:1000001 ! process or component of antibiotic biology or chemistry|ARO:3000000 ! determinant of antibiotic resistance|ARO:3000240 ! streptogramin resistance gene|ARO:3000233 ! streptogramin inactivation enzyme|ARO:3000376 ! streptogramin Vgb lyase
gi|153134|ARO_3002541|AAC(3)-VIIa__Streptomyces_rimosus_	0	0	0	0	0	0	0	0	0	0	0	0	0	0	0	0	0	0	0	0	0	0	0	0	0	0	0	0	0	0	0	0	0	0	0	0	0	0	0	0	0	0	0	0	0	0	0	0	ARO:1000001 ! process or component of antibiotic biology or chemistry|ARO:3000000 ! determinant of antibiotic resistance|ARO:3000104 ! aminoglycoside resistance gene|ARO:3000121 ! aminoglycoside acetyltransferase (AAC)|ARO:3000322 ! AAC(3)
gi|153161|ARO_3002649|APH(3_)-Va__Streptomyces_fradiae_	0	0	0	0	0	0	0	0	0	0	0	0	0	0	0	0	0	0	0	0	0	0	0	0	0	8.20744	0	0	0	0	0	0	0	0	0	0	0	0	0	0	0	0	0	0	0	0	0	0	ARO:1000001 ! process or component of antibiotic biology or chemistry|ARO:3000000 ! determinant of antibiotic resistance|ARO:3000557 ! antibiotic inactivation enzyme|ARO:3000114 ! aminoglycoside phosphotransferase (APH)|ARO:3000126 ! APH(3')
gi|153198|ARO_3002817|carA__Streptomyces_thermotolerans_	0	0	0	0	0	0	0	0	0	0	0	0	0	0	0	0	0	0	0	0	0	0	0	0	0	0	0	0	0	0	0	0	0	0	0	0	0	0	0	0	0	0	0	0	0	0	0	0	ARO:1000001 ! process or component of antibiotic biology or chemistry|ARO:3000000 ! determinant of antibiotic resistance|ARO:3000315 ! macrolide resistance gene|ARO:3000613 ! macrolide resistance efflux pump
gi|153200|ARO_3002823|ErmH__Streptomyces_thermotolerans_	0	0	0	0	0	0	0	0	0	0	0	0	0	0	0	0	0	0	0	0	0	0	0	0	0	0	0	0	0	0	0	0	0	0	0	0	0	0	0	0	0	0	0	0	0	0	0	0	ARO:1000001 ! process or component of antibiotic biology or chemistry|ARO:3000000 ! determinant of antibiotic resistance|ARO:3000315 ! macrolide resistance gene|ARO:3000560 ! Erm 23S ribosomal RNA methyltransferase
gi|153253|ARO_3001304|ErmS__Streptomyces_fradiae_	0	0	0	0	0	0	0	0	0	0	0	0	0	0	0	0	0	0	0	0	0	0	0	0	0	0	0	0	0	0	0	0	0	0	0	0	0	0	0	0	0	0	0	0	0	0	0	0	ARO:1000001 ! process or component of antibiotic biology or chemistry|ARO:3000000 ! determinant of antibiotic resistance|ARO:3000315 ! macrolide resistance gene|ARO:3000560 ! Erm 23S ribosomal RNA methyltransferase
gi|153339|ARO_3003564|EXO_beta-lactamase__Streptomyces_albus_	0	0	0	0	0	0	0	0	0	0	0	0	0	0	0	0	0	0	0	0	0	0	0	0	0	0	0	0	0	0	0	0	0	0	0	0	0	0	0	0	0	0	0	0	0	0	0	0	ARO:1000001 ! process or component of antibiotic biology or chemistry|ARO:3000000 ! determinant of antibiotic resistance|ARO:3000129 ! beta-lactam resistance gene|ARO:3000001 ! beta-lactamase|ARO:3000078 ! class A beta-lactamase
gi|153346|ARO_3001303|ErmO__Streptomyces_lividans_	0	0	0	0	0	0	0	0	0	0	0	0	0	0	0	0	0	0	0	0	0	0	0	0	0	0	0	0	0	0	0	0	0	0	0	0	0	0	0	0	0	0	0	0	0	0	0	0	ARO:1000001 ! process or component of antibiotic biology or chemistry|ARO:3000000 ! determinant of antibiotic resistance|ARO:3000315 ! macrolide resistance gene|ARO:3000560 ! Erm 23S ribosomal RNA methyltransferase
gi|153435|ARO_3002650|APH(3_)-Vb__Streptomyces_ribosidificus_	0	0	0	0	0	0	0	0	0	0	0	0	0	0	0	0	0	0	0	0	0	0	0	0	0	0	0	0	0	0	0	0	0	0	0	0	0	0	0	0	0	0	0	0	0	0	0	0	ARO:1000001 ! process or component of antibiotic biology or chemistry|ARO:3000000 ! determinant of antibiotic resistance|ARO:3000557 ! antibiotic inactivation enzyme|ARO:3000114 ! aminoglycoside phosphotransferase (APH)|ARO:3000126 ! APH(3')
gi|153490|ARO_3003554|tcmA__Streptomyces_glaucescens_	0	0	0	0	0	0	0	0	0	0	0	0	0	0	0	0	0	0	0	0	0	0	0	0	0	0	0	0	0	0	0	0	0	0	0	0	0	0	0	0	0	0	0	0	0	0	0	0	ARO:1000001 ! process or component of antibiotic biology or chemistry|ARO:3000000 ! determinant of antibiotic resistance|ARO:3000159 ! efflux pump conferring antibiotic resistance|ARO:0010002 ! major facilitator superfamily (MFS) antibiotic efflux pump
gi|153508|ARO_3002827|tlrC__Streptomyces_fradiae_	0	0	0	0	0	0	0	0	0	0	0	0	0	0	0	0	0	0	0	0	0	0	0	0	0	0	0	0	0	0	0	0	0	0	0	0	0	0	0	0	0	0	0	0	0	0	0	0	ARO:1000001 ! process or component of antibiotic biology or chemistry|ARO:3000000 ! determinant of antibiotic resistance|ARO:3000315 ! macrolide resistance gene|ARO:3000613 ! macrolide resistance efflux pump
gi|154685028|ARO_3002814|clbA__Bacillus_amyloliquefaciens_subsp__plantarum_str__FZB42_	0	0	0	0	0	0	0	0	0	0	0	0	0	0	0	0	0	0	0	0	0	0	0	0	0	0	0	0	0	0	0	0	0	0	0	0	0	0	0	0	0	0	0	0	0	0	0	0	ARO:1000001 ! process or component of antibiotic biology or chemistry|ARO:3000000 ! determinant of antibiotic resistance|ARO:3000052 ! phenicol resistance gene|ARO:3000202 ! Cfr 23S ribosomal RNA methyltransferase
gi|154893|ARO_3000498|ErmF__Bacteroides_fragilis_	0	0	0	0	0	0	0	0	0	0	0	0	0	0	0	0	0	0	0	0	0	0	0	0	0	0	0	0	0	0	0	0	0	0	0	0	0	0	0	0	0	0	0	0	0	0	0	0	ARO:1000001 ! process or component of antibiotic biology or chemistry|ARO:3000000 ! determinant of antibiotic resistance|ARO:3000315 ! macrolide resistance gene|ARO:3000560 ! Erm 23S ribosomal RNA methyltransferase
gi|155014|ARO_3001404|OXA-9__Klebsiella_pneumoniae_	0	0	0	0	0	0	0	0	0	0	0	0	0	0	0	0	0	0	0	0	0	0	0	0	0	0	0	0	0	0	0	0	0	0	0	0	0	0	0	0	0	0	0	0	0	0	0	0	ARO:1000001 ! process or component of antibiotic biology or chemistry|ARO:3000000 ! determinant of antibiotic resistance|ARO:3000129 ! beta-lactam resistance gene|ARO:3000001 ! beta-lactamase|ARO:3000075 ! class D beta-lactamase|ARO:3000017 ! OXA beta-lactamase
gi|155022|ARO_3000205|tetX__Bacteroides_fragilis_	0	0	0	0	0	0	0	0	0	0	0	0	0	0	0	0	0	0	0	0	0	0	0	0	0	0	0	0	0	0	11.0591	0	0	0	0	0	0	0	0	0	0	0	0	0	0	0	0	0	ARO:1000001 ! process or component of antibiotic biology or chemistry|ARO:3000000 ! determinant of antibiotic resistance|ARO:3000557 ! antibiotic inactivation enzyme|ARO:3000036 ! tetracycline inactivation enzyme
gi|155039|ARO_3002919|vanRA__Enterococcus_faecium_	0	0	0	0	0	0	0	0	0	0	0	0	0	0	0	0	0	0	0	0	0	0	0	0	0	0	0	0	0	0	0	0	0	0	0	0	0	0	0	0	0	0	0	0	0	0	0	0	ARO:1000001 ! process or component of antibiotic biology or chemistry|ARO:3000000 ! determinant of antibiotic resistance|ARO:3000012 ! gene conferring antibiotic resistance via molecular bypass|ARO:3002976 ! gene associated with a glycopeptide resistance cluster|ARO:3002905 ! VanS-VanR two-component regulatory system|ARO:3000574 ! vanR
gi|155041|ARO_3002942|vanHA__Enterococcus_faecium_	0	0	0	0	0	0	0	0	0	0	0	0	0	0	0	0	0	0	0	0	0	0	0	0	0	0	0	0	0	0	0	0	0	0	0	0	0	0	0	0	0	0	0	0	0	0	0	0	ARO:1000001 ! process or component of antibiotic biology or chemistry|ARO:3000000 ! determinant of antibiotic resistance|ARO:3000012 ! gene conferring antibiotic resistance via molecular bypass|ARO:3002976 ! gene associated with a glycopeptide resistance cluster|ARO:3000006 ! vanH
gi|155042|ARO_3000010|vanA__Enterococcus_faecium_	0	0	0	0	0	0	0	0	0	0	0	0	0	0	0	0	0	0	0	0	0	0	0	0	0	0	0	0	0	0	0	0	0	0	0	0	0	0	0	0	0	0	0	0	0	0	0	0	ARO:1000001 ! process or component of antibiotic biology or chemistry|ARO:3000000 ! determinant of antibiotic resistance|ARO:3000012 ! gene conferring antibiotic resistance via molecular bypass|ARO:3002976 ! gene associated with a glycopeptide resistance cluster|ARO:3002906 ! van ligase|ARO:3002978 ! D-Ala-D-Lac ligase
gi|155043|ARO_3002949|vanXA__Enterococcus_faecium_	0	0	0	0	0	0	0	0	0	0	0	0	0	0	0	0	0	0	0	0	0	0	0	0	0	0	0	0	0	0	0	0	0	0	0	0	0	0	0	0	0	0	0	0	0	0	0	0	ARO:1000001 ! process or component of antibiotic biology or chemistry|ARO:3000000 ! determinant of antibiotic resistance|ARO:3000012 ! gene conferring antibiotic resistance via molecular bypass|ARO:3002976 ! gene associated with a glycopeptide resistance cluster|ARO:3000011 ! vanX
gi|155044|ARO_3002955|vanYA__Enterococcus_faecium_	0	0	0	0	0	0	0	0	0	0	0	0	0	0	0	0	0	0	0	0	0	0	0	0	0	0	0	0	0	0	0	0	0	0	0	0	0	0	0	0	0	0	0	0	0	0	0	0	ARO:1000001 ! process or component of antibiotic biology or chemistry|ARO:3000000 ! determinant of antibiotic resistance|ARO:3000012 ! gene conferring antibiotic resistance via molecular bypass|ARO:3002976 ! gene associated with a glycopeptide resistance cluster|ARO:3000077 ! vanY
gi|155793484|ARO_3000160|blaI__Bacillus_clausii_	0	0	0	0	0	0	0	0	0	0	0	0	0	0	0	0	0	0	0	0	0	0	0	0	0	0	0	0	0	0	0	0	0	0	0	0	0	0	0	0	0	0	0	0	0	0	0	0	ARO:1000001 ! process or component of antibiotic biology or chemistry|ARO:3000000 ! determinant of antibiotic resistance|ARO:3000100 ! gene modulating beta-lactam resistance
gi|155793485|ARO_3000217|blaR1__Bacillus_clausii_	0	0	0	0	0	0	0	0	0	0	0	0	0	0	0	0	0	0	0	0	0	0	0	0	0	0	0	0	0	0	0	0	0	0	0	0	0	0	0	0	0	0	0	0	0	0	0	0	ARO:1000001 ! process or component of antibiotic biology or chemistry|ARO:3000000 ! determinant of antibiotic resistance|ARO:3000100 ! gene modulating beta-lactam resistance
gi|15595622|ARO_3000377|mexA__Pseudomonas_aeruginosa_PAO1_	0	0	0	0	0	0	0	0	0	0	0	0	0	0	0	0	0	0	0	0	0	0	0	0	0	0	0	0	0	0	0	0	0	0	0	0	0	0	0	0	0	0	0	0	0	0	0	0	ARO:1000001 ! process or component of antibiotic biology or chemistry|ARO:3000000 ! determinant of antibiotic resistance|ARO:3000159 ! efflux pump conferring antibiotic resistance|ARO:3000748 ! subunit of efflux pump conferring antibiotic resistance
gi|15595624|ARO_3000379|oprM__Pseudomonas_aeruginosa_PAO1_	0	0	0	0	0	0	0	0	0	0	0	0	0	0	0	0	0	0	0	0	0	0	0	0	0	0	0	0	0	0	0	0	0	0	0	0	0	0	0	0	0	0	0	0	0	0	0	0	ARO:1000001 ! process or component of antibiotic biology or chemistry|ARO:3000000 ! determinant of antibiotic resistance|ARO:3000159 ! efflux pump conferring antibiotic resistance|ARO:3000748 ! subunit of efflux pump conferring antibiotic resistance
gi|15595903|ARO_3002679|catB7__Pseudomonas_aeruginosa_PAO1_	0	0	0	0	0	0	0	0	0	0	0	0	0	0	0	0	0	0	0	0	0	0	0	0	0	0	0	0	0	0	0	0	0	0	0	0	0	0	0	0	0	0	0	0	0	0	0	0	ARO:1000001 ! process or component of antibiotic biology or chemistry|ARO:3000000 ! determinant of antibiotic resistance|ARO:3000557 ! antibiotic inactivation enzyme|ARO:3000122 ! chloramphenicol acetyltransferase (CAT)
gi|15597215|ARO_3002982|amrA__Pseudomonas_aeruginosa_PAO1_	0	0	0	0	0	0	0	1.20398	0	0	0	0	0	0.75886	0	0	0	0	0	0	0	0	1.32597	0	0	0	0	0	0	0	0	0	0	0	0	0	0	0	1.10836	0	0	0	0	0	0	0	0	0	ARO:1000001 ! process or component of antibiotic biology or chemistry|ARO:3000000 ! determinant of antibiotic resistance|ARO:3000159 ! efflux pump conferring antibiotic resistance|ARO:3000748 ! subunit of efflux pump conferring antibiotic resistance
gi|15597689|ARO_3000803|mexE__Pseudomonas_aeruginosa_PAO1_	0	0	0	0	0	0	0	0	0	0	0	0	0	0	0	0	0	0	0	0	0	0	0	0	0	0	0	0	0	0	0	0	0	0	0	0	0	0	0	0	0	0	0	0	0	0	0	0	ARO:1000001 ! process or component of antibiotic biology or chemistry|ARO:3000000 ! determinant of antibiotic resistance|ARO:3000159 ! efflux pump conferring antibiotic resistance|ARO:3000748 ! subunit of efflux pump conferring antibiotic resistance
gi|15597690|ARO_3000804|mexF__Pseudomonas_aeruginosa_PAO1_	0	0	0	0	0	0	0	0	0	0	0	0	0	0	0	0	0	0	0	0	0	0	0	0	0	0	0	0	0	0	0	0	0	0	0	0	0	0	0	0	0	0	0	0	0	0	0	0	ARO:1000001 ! process or component of antibiotic biology or chemistry|ARO:3000000 ! determinant of antibiotic resistance|ARO:3000159 ! efflux pump conferring antibiotic resistance|ARO:3000748 ! subunit of efflux pump conferring antibiotic resistance
gi|15597691|ARO_3000805|oprN__Pseudomonas_aeruginosa_PAO1_	0	0	0	0	0	0	0	0	0	0	0	0	0	0	0	0	0	0	0	0	0	0	0	0	0	0	0	0	0	0	0	0	0	0	0	0	0	0	0	0	0	0	0	0	0	0	0	0	ARO:1000001 ! process or component of antibiotic biology or chemistry|ARO:3000000 ! determinant of antibiotic resistance|ARO:3000159 ! efflux pump conferring antibiotic resistance|ARO:3000748 ! subunit of efflux pump conferring antibiotic resistance
gi|15598770|ARO_3000819|nalD__Pseudomonas_aeruginosa_PAO1_	0	0	0	0	0	0	0	0	0	0	0	0	0	0	0	0	0	0	0	0	0	0	0	0	0	0	0	0	0	0	0	0	0	0	0	0	0	0	0	0	0	0	0	0	0	0	0	0	ARO:1000001 ! process or component of antibiotic biology or chemistry|ARO:3000000 ! determinant of antibiotic resistance|ARO:3000451 ! gene modulating antibiotic efflux
gi|15598916|ARO_3000818|nalC__Pseudomonas_aeruginosa_PAO1_	0	0	0	0	0	0	0	0	0	0	0	0	0	0	0	0	0	0	0	0	0	0	0	0	0	0	0	0	0	0	0	0	0	0	0	0	0	0	0	0	0	0	0	0	0	0	0	0	ARO:1000001 ! process or component of antibiotic biology or chemistry|ARO:3000000 ! determinant of antibiotic resistance|ARO:3000451 ! gene modulating antibiotic efflux
gi|15599400|ARO_3000806|mexG__Pseudomonas_aeruginosa_PAO1_	0	0	0	0	0	0	0	0	0	0	0	0	0	0	0	0	0	0	0	0	0	0	0	0	0	0	0	0	0	0	0	0	0	0	0	0	0	0	0	0	0	0	0	0	0	0	0	0	ARO:1000001 ! process or component of antibiotic biology or chemistry|ARO:3000000 ! determinant of antibiotic resistance|ARO:3000159 ! efflux pump conferring antibiotic resistance|ARO:3000748 ! subunit of efflux pump conferring antibiotic resistance
gi|15599401|ARO_3000807|mexH__Pseudomonas_aeruginosa_PAO1_	0	0	0	0	0	0	0	0	0	0	0	0	0	0	0	0	0	0	0	0	0	0	0	0	0	0	0	0	0	0	0	0	0	0	0	0	0	0	0	0	0	0	0	0	0	0	0	0	ARO:1000001 ! process or component of antibiotic biology or chemistry|ARO:3000000 ! determinant of antibiotic resistance|ARO:3000159 ! efflux pump conferring antibiotic resistance|ARO:3000748 ! subunit of efflux pump conferring antibiotic resistance
gi|15599402|ARO_3000808|mexI__Pseudomonas_aeruginosa_PAO1_	0	0	0	0	0	0	0	0	0	0	0	0	0	0	0	0	0	0	0	0	0	0	0	0	0	0	0	0	0	0	0	0	0	0	0	0	0	0	0	0	0	0	0	0	0	0	0	0	ARO:1000001 ! process or component of antibiotic biology or chemistry|ARO:3000000 ! determinant of antibiotic resistance|ARO:3000159 ! efflux pump conferring antibiotic resistance|ARO:3000748 ! subunit of efflux pump conferring antibiotic resistance
gi|15599403|ARO_3000809|opmD__Pseudomonas_aeruginosa_PAO1_	0	0	0	0	0	0	0	0	0	0	0	0	0	0	0	0	0	0	0	0	0	0	0	0	0	0	0	0	0	0	0	0	0	0	0	0	0	0	0	0	0	0	0	0	0	0	0	0	ARO:1000001 ! process or component of antibiotic biology or chemistry|ARO:3000000 ! determinant of antibiotic resistance|ARO:3000159 ! efflux pump conferring antibiotic resistance|ARO:3000748 ! subunit of efflux pump conferring antibiotic resistance
gi|15599796|ARO_3000820|nfxB__Pseudomonas_aeruginosa_PAO1_	0	0	0	0	0	0	0	0	0	0	0	0	0	0	0	0	0	0	0	0	0	0	2.88254	0	0	0	0	0	0	0	0	0	0	0	0	0	0	0	0	0	0	0	0	0	0	0	0	0	ARO:1000001 ! process or component of antibiotic biology or chemistry|ARO:3000000 ! determinant of antibiotic resistance|ARO:3000451 ! gene modulating antibiotic efflux
gi|15606853|ARO_3003098|cphA1__Aquifex_aeolicus_VF5_	0	0	0	0	0	0	0	0	0	0	0	0	0	0	0	0	0	0	0	0	0	0	0	0	0	0	0	0	0	0	0	0	0	0	0	0	0	0	0	0	0	0	0	0	0	0	0	0	ARO:1000001 ! process or component of antibiotic biology or chemistry|ARO:3000000 ! determinant of antibiotic resistance|ARO:3000129 ! beta-lactam resistance gene|ARO:3000001 ! beta-lactamase|ARO:3000004 ! class B (metallo-) beta-lactamase|ARO:3000570 ! subclass B2 (metallo-) beta-lactamase|ARO:3000581 ! CphA beta-lactamase
gi|15677562|ARO_3000811|mtrD__Neisseria_meningitidis_MC58_	0	0	0	0	0	0	0	0	0	0	0	0	0	0	0	0	0	0	0	0	0	0	0	0	0	0	0	0	0	0	0	0	0	0	0	0	0	0	0	0	0	0	0	0	0	0	0	0	ARO:1000001 ! process or component of antibiotic biology or chemistry|ARO:3000000 ! determinant of antibiotic resistance|ARO:3000159 ! efflux pump conferring antibiotic resistance|ARO:3000748 ! subunit of efflux pump conferring antibiotic resistance
gi|15677563|ARO_3000810|mtrC__Neisseria_meningitidis_MC58_	0	0	0	0	0	0	0	0	0	0	0	0	0	0	0	0	0	0	0	0	0	0	0	0	0	0	0	0	0	0	0	0	0	0	0	0	0	0	0	0	0	0	0	0	0	0	0	0	ARO:1000001 ! process or component of antibiotic biology or chemistry|ARO:3000000 ! determinant of antibiotic resistance|ARO:3000159 ! efflux pump conferring antibiotic resistance|ARO:3000748 ! subunit of efflux pump conferring antibiotic resistance
gi|156978661|ARO_3000746|mepR__Staphylococcus_aureus_subsp__aureus_Mu3_	2.30608	0	0	0	0	0	0	0	0	0	0	0	0	0	0	0	0	0	0	0	0	0	0	0	0	0	0	0	0	0	0	0	0	0	0	0	0	0	0	0	0	0	0	0	0	0	0	0	ARO:1000001 ! process or component of antibiotic biology or chemistry|ARO:3000000 ! determinant of antibiotic resistance|ARO:3000451 ! gene modulating antibiotic efflux
gi|157272130|ARO_3002676|catB3__Pseudomonas_aeruginosa_	0	0	0	0	0	0	0	0	0	0	0	0	0	0	0	0	0	0	0	0	0	0	0	0	0	0	0	0	0	0	0	0	0	0	0	0	0	0	0	0	0	0	0	0	0	0	0	0	ARO:1000001 ! process or component of antibiotic biology or chemistry|ARO:3000000 ! determinant of antibiotic resistance|ARO:3000557 ! antibiotic inactivation enzyme|ARO:3000122 ! chloramphenicol acetyltransferase (CAT)
gi|157272131|ARO_3002849|arr-4__Pseudomonas_aeruginosa_	0	0	0	0	0	0	0	0	0	0	0	0	0	0	0	0	0	0	0	0	0	0	0	0	0	0	0	0	0	0	0	0	0	0	0	0	0	0	0	0	0	0	0	0	0	0	0	0	ARO:1000001 ! process or component of antibiotic biology or chemistry|ARO:3000000 ! determinant of antibiotic resistance|ARO:3000383 ! rifampin resistance gene|ARO:3000576 ! rifampin inactivation enzyme|ARO:3000390 ! rifampin ADP-ribosyltransferase (Arr)
gi|157272134|ARO_3002850|arr-5__Klebsiella_pneumoniae_	0	0	0	0	0	0	0	0	0	0	0	0	0	0	0	0	0	0	0	0	0	0	0	0	0	0	0	0	0	0	0	0	0	0	0	0	0	0	0	0	0	0	0	0	0	0	0	0	ARO:1000001 ! process or component of antibiotic biology or chemistry|ARO:3000000 ! determinant of antibiotic resistance|ARO:3000383 ! rifampin resistance gene|ARO:3000576 ! rifampin inactivation enzyme|ARO:3000390 ! rifampin ADP-ribosyltransferase (Arr)
gi|157412102|ARO_3002540|AAC(3)-VIa__Escherichia_coli_APEC_O1_	0	0	0	0	0	0	0	0	0	0	0	0	0	0	0	0	0	0	0	0	0	0	0	0	0	0	0	0	0	0	0	0	0	0	0	0	0	0	0	0	0	0	0	0	0	0	0	0	ARO:1000001 ! process or component of antibiotic biology or chemistry|ARO:3000000 ! determinant of antibiotic resistance|ARO:3000104 ! aminoglycoside resistance gene|ARO:3000121 ! aminoglycoside acetyltransferase (AAC)|ARO:3000322 ! AAC(3)
gi|1575682|ARO_3002663|APH(9)-Ib__Streptomyces_netropsis_	0	0	0	0	0	0	0	0	0	0	0	0	0	0	0	0	0	0	0	0	0	0	0	0	0	0	0	0	0	0	0	0	0	0	0	0	0	0	0	0	0	0	0	0	0	0	0	0	ARO:1000001 ! process or component of antibiotic biology or chemistry|ARO:3000000 ! determinant of antibiotic resistance|ARO:3000557 ! antibiotic inactivation enzyme|ARO:3000114 ! aminoglycoside phosphotransferase (APH)|ARO:3000153 ! APH(9)
gi|157734594|ARO_3002665|npmA__Escherichia_coli_	0	0	0	0	0	0	0	0	0	0	0	0	0	0	0	0	0	0	0	0	0	0	0	0	0	0	0	0	0	0	0	0	0	0	0	0	0	0	0	0	0	0	0	0	0	0	0	0	ARO:1000001 ! process or component of antibiotic biology or chemistry|ARO:3000000 ! determinant of antibiotic resistance|ARO:3000519 ! antibiotic target modifying enzyme|ARO:3000164 ! rRNA methyltransferase conferring antibiotic resistance|ARO:3000857 ! 16S ribosomal RNA methyltransferase
gi|157965686|ARO_3000603|Erm(41)__Mycobacterium_abscessus_	0	0	0	0	0	0	0	0	0	0	0	0	0	0	0	0	0	0	0	0	0	0	0	0	0	0	0	0	0	0	0	0	0	0	0	0	0	0	0	0	0	0	0	0	0	0	0	0	ARO:1000001 ! process or component of antibiotic biology or chemistry|ARO:3000000 ! determinant of antibiotic resistance|ARO:3000315 ! macrolide resistance gene|ARO:3000560 ! Erm 23S ribosomal RNA methyltransferase
gi|15830993|ARO_3000676|H-NS__Escherichia_coli_O157_H7_str__Sakai_	0	0	0	0	0	0	0	0	0	0	0	0	0	0	0	0	0	0	11.5992	0	0	0	0	8.9238	0	0	0	0	0	0	0	0	0	0	0	0	0	0	0	0	0	0	0	0	0	0	0	0	ARO:1000001 ! process or component of antibiotic biology or chemistry|ARO:3000000 ! determinant of antibiotic resistance|ARO:3000451 ! gene modulating antibiotic efflux
gi|15832502|ARO_3000832|evgA__Escherichia_coli_O157_H7_str__Sakai_	0	0	0	0	0	0	0	0	0	0	0	0	0	0	0	0	0	0	0	0	0	0	0	0	0	0	0	0	0	0	0	0	0	0	0	0	0	0	0	0	0	0	0	0	3.55846	0	0	0	ARO:1000001 ! process or component of antibiotic biology or chemistry|ARO:3000000 ! determinant of antibiotic resistance|ARO:3000451 ! gene modulating antibiotic efflux|ARO:3000750 ! subunit of gene modulating antibiotic efflux
gi|15834091|ARO_3000830|cpxA__Escherichia_coli_O157_H7_str__Sakai_	0	0	0	0	0	0	0	0	0	0	0	0	0	0	0	0	26.6813	0	0	0	0	0	0	4.4619	0	0	0	0	0	0	0	0	0	0	0	0	0	0	0	0	0	0	0	0	10.9491	0	0	0	ARO:1000001 ! process or component of antibiotic biology or chemistry|ARO:3000000 ! determinant of antibiotic resistance|ARO:3000451 ! gene modulating antibiotic efflux|ARO:3000750 ! subunit of gene modulating antibiotic efflux
gi|15834092|ARO_3000831|cpxR__Escherichia_coli_O157_H7_str__Sakai_	0	0	0	0	0	0	0	0	0	0	0	0	0	0	0	0	0	0	0	0	0	0	0	0	0	0	0	0	0	0	0	0	0	0	0	0	0	0	0	0	0	0	0	0	0	0	0	0	ARO:1000001 ! process or component of antibiotic biology or chemistry|ARO:3000000 ! determinant of antibiotic resistance|ARO:3000451 ! gene modulating antibiotic efflux|ARO:3000750 ! subunit of gene modulating antibiotic efflux
gi|158392670|ARO_3000847|KHM-1_beta-lactamase__Citrobacter_freundii_	0	0	0	0	0	0	0	0	0	0	0	0	0	0	0	0	0	0	0	0	0	0	0	0	0	0	0	0	0	0	0	0	0	0	0	0	0	0	0	0	0	0	0	0	0	0	0	0	ARO:1000001 ! process or component of antibiotic biology or chemistry|ARO:3000000 ! determinant of antibiotic resistance|ARO:3000129 ! beta-lactam resistance gene|ARO:3000001 ! beta-lactamase|ARO:3000004 ! class B (metallo-) beta-lactamase|ARO:3000568 ! subclass B1 (metallo-) beta-lactamase
gi|158634584|ARO_3001767|OXA-137__Brachyspira_pilosicoli_	0	0	0	0	0	0	0	0	0	0	0	0	0	0	0	0	0	0	0	0	0	0	0	0	0	0	0	0	0	0	0	0	0	0	0	0	0	0	0	0	0	0	0	0	0	0	0	0	ARO:1000001 ! process or component of antibiotic biology or chemistry|ARO:3000000 ! determinant of antibiotic resistance|ARO:3000129 ! beta-lactam resistance gene|ARO:3000001 ! beta-lactamase|ARO:3000075 ! class D beta-lactamase|ARO:3000017 ! OXA beta-lactamase
gi|15903015|ARO_3000614|mefE__Streptococcus_pneumoniae_R6_	0	0	0	0	0	0	0	0	0	0	0	0	0	0	0	0	0	0	0	0	0	0	0	0	0	0	0	0	0	0	0	0	0	0	0	0	0	0	0	0	0	0	0	0	0	0	0	0	ARO:1000001 ! process or component of antibiotic biology or chemistry|ARO:3000000 ! determinant of antibiotic resistance|ARO:3000159 ! efflux pump conferring antibiotic resistance|ARO:0010002 ! major facilitator superfamily (MFS) antibiotic efflux pump|ARO:3000747 ! mef
gi|15903950|ARO_3003044|PBP1b__Streptococcus_pneumoniae_R6_	0	0	0	0	0	0	0	0	0	0	0	0	0	0	0	0	0	0	0	0	0	0	0	0	0	0	0	0	0	0	0	0	0	0	0	0	0	0	0	0	0	0	0	0	0	0	0	0	ARO:1000001 ! process or component of antibiotic biology or chemistry|ARO:3000000 ! determinant of antibiotic resistance|ARO:3000381 ! antibiotic target replacement protein|ARO:3003040 ! beta-lactam resistant penicillin-binding proteins
gi|15925747|ARO_3000124|mecI__Staphylococcus_aureus_subsp__aureus_N315_	0	0	0	0	0	0	0	0.940607	0	0	0	0	0	0	0	0	0	0	0	0	0	0	0	0	0	0	0	0	0	0	0	0	0	0	0	0	0	0	0	0	0	0	0	0	0	0	0	0	ARO:1000001 ! process or component of antibiotic biology or chemistry|ARO:3000000 ! determinant of antibiotic resistance|ARO:3000100 ! gene modulating beta-lactam resistance
gi|160947040|ARO_3002910|vanL__Enterococcus_faecalis_	0	0	0	0	0	0	0	0	0	0	0	0	0	0	0	0	0	0	0	0	0	0	0	0	0	0	0	0	0	0	0	0	0	0	0	0	0	0	0	0	0	0	0	0	0	0	0	0	ARO:1000001 ! process or component of antibiotic biology or chemistry|ARO:3000000 ! determinant of antibiotic resistance|ARO:3000012 ! gene conferring antibiotic resistance via molecular bypass|ARO:3002976 ! gene associated with a glycopeptide resistance cluster|ARO:3002906 ! van ligase|ARO:3002979 ! D-Ala-D-Ser ligase
gi|160947041|ARO_3002968|vanXYL__Enterococcus_faecalis_	0	0	0	0	0	0	0	0	0	0	0	0	0	0	0	0	0	0	0	0	0	0	0	0	0	0	0	0	0	0	0	0	0	0	0	0	0	0	0	0	0	0	0	0	0	0	0	0	ARO:1000001 ! process or component of antibiotic biology or chemistry|ARO:3000000 ! determinant of antibiotic resistance|ARO:3000012 ! gene conferring antibiotic resistance via molecular bypass|ARO:3002976 ! gene associated with a glycopeptide resistance cluster|ARO:3000496 ! vanXY
gi|160947042|ARO_3002973|vanTmL__Enterococcus_faecalis_	0	0	0	0	0	0	0	0	0	0	0	0	0	0	0	0	0	0	0	0	0	0	0	0	0	0	0	0	0	0	0	0	0	0	0	0	0	0	0	0	0	0	0	0	0	0	0	0	ARO:1000001 ! process or component of antibiotic biology or chemistry|ARO:3000000 ! determinant of antibiotic resistance|ARO:3000012 ! gene conferring antibiotic resistance via molecular bypass|ARO:3002976 ! gene associated with a glycopeptide resistance cluster|ARO:3000372 ! vanT
gi|160947043|ARO_3002974|vanTrL__Enterococcus_faecalis_	0	0	0	0	0	0	0	0	0	0	0	0	0	0	0	0	0	0	0	0	0	0	0	0	0	0	0	0	0	0	0	0	0	0	0	0	0	0	0	0	0	0	0	0	0	0	0	0	ARO:1000001 ! process or component of antibiotic biology or chemistry|ARO:3000000 ! determinant of antibiotic resistance|ARO:3000012 ! gene conferring antibiotic resistance via molecular bypass|ARO:3002976 ! gene associated with a glycopeptide resistance cluster|ARO:3000372 ! vanT
gi|160947044|ARO_3002927|vanRL__Enterococcus_faecalis_	0	0	0	0	0	0	0	0	0	0	0	0	0	0	0	0	0	0	0	0	0	0	0	0	0	0	0	0	0	0	0	0	0	0	0	0	0	0	0	0	0	0	0	0	0	0	0	0	ARO:1000001 ! process or component of antibiotic biology or chemistry|ARO:3000000 ! determinant of antibiotic resistance|ARO:3000012 ! gene conferring antibiotic resistance via molecular bypass|ARO:3002976 ! gene associated with a glycopeptide resistance cluster|ARO:3002905 ! VanS-VanR two-component regulatory system|ARO:3000574 ! vanR
gi|160947045|ARO_3002938|vanSL__Enterococcus_faecalis_	0	0	0	0	0	0	0	0	0	0	0	0	0	0	0	0	0	0	0	0	0	0	0	0	0	0	0	0	0	0	0	0	0	0	0	0	0	0	0	0	0	0	0	0	0	0	0	0	ARO:1000001 ! process or component of antibiotic biology or chemistry|ARO:3000000 ! determinant of antibiotic resistance|ARO:3000012 ! gene conferring antibiotic resistance via molecular bypass|ARO:3002976 ! gene associated with a glycopeptide resistance cluster|ARO:3002905 ! VanS-VanR two-component regulatory system|ARO:3000071 ! vanS
gi|161508254|ARO_3000621|PC1_beta-lactamase_(blaZ)__Staphylococcus_aureus_subsp__aureus_USA300_TCH959_	0	0	0	0	0	0	0	0	0	0	3.72713	0	0	3.03544	0	0	0	0	0	0	0	0	0	0	0	0	0	0	0	0	0	1.34775	0	0	0	1.58172	0	0	1.10836	0	0	0	0	0	0	3.36423	0	0	ARO:1000001 ! process or component of antibiotic biology or chemistry|ARO:3000000 ! determinant of antibiotic resistance|ARO:3000129 ! beta-lactam resistance gene|ARO:3000001 ! beta-lactamase|ARO:3000078 ! class A beta-lactamase
gi|16151348|ARO_3000476|tet31__Aeromonas_salmonicida_subsp__salmonicida_	0	0	0	0	0	0	0	0	0	0	0	0	0	0	0	0	0	0	0	0	0	0	0	0	0	0	0	0	0	0	0	0	0	0	0	0	0	0	0	0	0	0	0	0	0	0	0	0	ARO:1000001 ! process or component of antibiotic biology or chemistry|ARO:3000000 ! determinant of antibiotic resistance|ARO:3000159 ! efflux pump conferring antibiotic resistance|ARO:0010002 ! major facilitator superfamily (MFS) antibiotic efflux pump
gi|164633076|ARO_3002667|rmtD__Klebsiella_pneumoniae_	0	0	0	0	0	0	0	0	0	0	0	0	0	0	0	0	0	0	0	0	0	0	0	0	0	0	0	0	0	0	0	0	0	0	0	0	0	0	0	0	0	0	0	0	0	0	0	0	ARO:1000001 ! process or component of antibiotic biology or chemistry|ARO:3000000 ! determinant of antibiotic resistance|ARO:3000519 ! antibiotic target modifying enzyme|ARO:3000164 ! rRNA methyltransferase conferring antibiotic resistance|ARO:3000857 ! 16S ribosomal RNA methyltransferase
gi|1651558|ARO_3000834|phoP__Escherichia_coli_str__K-12_substr__W3110_	0	0	0	0	0	0	0	0	0	0	0	0	0	0	0	0	0	0	0	0	0	0	0	0	0	0	0	0	0	0	0	0	0	0	0	0	0	0	0	0	0	0	0	0	0	0	0	0	ARO:1000001 ! process or component of antibiotic biology or chemistry|ARO:3000000 ! determinant of antibiotic resistance|ARO:3000451 ! gene modulating antibiotic efflux|ARO:3000750 ! subunit of gene modulating antibiotic efflux
gi|16612079|ARO_3002907|vanE__Enterococcus_faecalis_	0	0	0	0	0	0	0	0	0	0	0	0	0	0	0	0	0	0	0	0	0	0	0	0	0	0	0	0	0	0	0	0	0	0	0	0	0	0	0	0	0	0	0	0	0	0	0	0	ARO:1000001 ! process or component of antibiotic biology or chemistry|ARO:3000000 ! determinant of antibiotic resistance|ARO:3000012 ! gene conferring antibiotic resistance via molecular bypass|ARO:3002976 ! gene associated with a glycopeptide resistance cluster|ARO:3002906 ! van ligase|ARO:3002979 ! D-Ala-D-Ser ligase
gi|16612080|ARO_3002967|vanXYE__Enterococcus_faecalis_	0	0	0	0	0	0	0	0	0	0	0	0	0	0	0	0	0	0	0	0	0	0	0	0	0	0	0	0	0	0	0	0	0	0	0	0	0	0	0	0	0	0	0	0	0	0	0	0	ARO:1000001 ! process or component of antibiotic biology or chemistry|ARO:3000000 ! determinant of antibiotic resistance|ARO:3000012 ! gene conferring antibiotic resistance via molecular bypass|ARO:3002976 ! gene associated with a glycopeptide resistance cluster|ARO:3000496 ! vanXY
gi|16612081|ARO_3002971|vanTE__Enterococcus_faecalis_	0	0	0	0	0	0	0	0	0	0	0	0	0	0	0	0	0	0	0	0	0	0	0	0	0	0	0	0	0	0	0	0	0	0	0	0	0	0	0	0	0	0	0	0	0	0	0	0	ARO:1000001 ! process or component of antibiotic biology or chemistry|ARO:3000000 ! determinant of antibiotic resistance|ARO:3000012 ! gene conferring antibiotic resistance via molecular bypass|ARO:3002976 ! gene associated with a glycopeptide resistance cluster|ARO:3000372 ! vanT
gi|16612082|ARO_3002924|vanRE__Enterococcus_faecalis_	0	0	0	0	0	0	0	0	0	0	0	0	0	0	0	0	0	0	0	0	0	0	0	0	0	0	0	0	0	0	0	0	0	0	0	0	0	0	0	0	0	0	0	0	0	0	0	0	ARO:1000001 ! process or component of antibiotic biology or chemistry|ARO:3000000 ! determinant of antibiotic resistance|ARO:3000012 ! gene conferring antibiotic resistance via molecular bypass|ARO:3002976 ! gene associated with a glycopeptide resistance cluster|ARO:3002905 ! VanS-VanR two-component regulatory system|ARO:3000574 ! vanR
gi|16612083|ARO_3002935|vanSE__Enterococcus_faecalis_	0	0	0	0	0	0	0	0	0	0	0	0	0	0	0	0	0	0	0	0	0	0	0	0	0	0	0	0	0	0	0	0	0	0	0	0	0	0	0	0	0	0	0	0	0	0	0	0	ARO:1000001 ! process or component of antibiotic biology or chemistry|ARO:3000000 ! determinant of antibiotic resistance|ARO:3000012 ! gene conferring antibiotic resistance via molecular bypass|ARO:3002976 ! gene associated with a glycopeptide resistance cluster|ARO:3002905 ! VanS-VanR two-component regulatory system|ARO:3000071 ! vanS
gi|1667472|ARO_3002671|cat-TC__Lactobacillus_reuteri_	0	0	0	0	0	0	0	0	0	0	0	0	0	0	0	0	0	0	0	0	0	0	0	0	0	0	0	0	0	0	0	0	0	0	0	0	0	0	0	0	0	0	0	0	0	0	0	0	ARO:1000001 ! process or component of antibiotic biology or chemistry|ARO:3000000 ! determinant of antibiotic resistance|ARO:3000557 ! antibiotic inactivation enzyme|ARO:3000122 ! chloramphenicol acetyltransferase (CAT)
gi|16763731|ARO_3000790|mdsB__Salmonella_enterica_subsp__enterica_serovar_Typhimurium_str__LT2_	0	0	0	0	0	0	0	0	0	0	0	0	0	0	0	0	0	0	0	0	0	0	0	0	0	0	0	0	0	0	0	0	0	0	0	0	0	0	0	0	0	0	0	0	0	0	0	0	ARO:1000001 ! process or component of antibiotic biology or chemistry|ARO:3000000 ! determinant of antibiotic resistance|ARO:3000159 ! efflux pump conferring antibiotic resistance|ARO:3000748 ! subunit of efflux pump conferring antibiotic resistance
gi|16763734|ARO_3000504|golS__Salmonella_enterica_subsp__enterica_serovar_Typhimurium_str__LT2_	0	0	0	0	0	0	0	0	0	0	0	0	0	0	0	0	0	0	0	0	0	0	0	0	0	0	0	0	0	0	0	0	0	0	0	0	0	0	0	0	0	0	0	0	0	0	0	0	ARO:1000001 ! process or component of antibiotic biology or chemistry|ARO:3000000 ! determinant of antibiotic resistance|ARO:3000451 ! gene modulating antibiotic efflux
gi|16765288|ARO_3000826|sdiA__Salmonella_enterica_subsp__enterica_serovar_Typhimurium_str__LT2_	0	0	0	0	0	0	0	0	0	0	0	0	0	0	0	0	0	0	0	0	0	0	0	0	0	0	0	0	0	0	0	0	0	0	0	0	0	0	0	0	0	0	0	0	0	0	0	0	ARO:1000001 ! process or component of antibiotic biology or chemistry|ARO:3000000 ! determinant of antibiotic resistance|ARO:3000451 ! gene modulating antibiotic efflux
gi|168259002|ARO_3000194|tetW__Bifidobacterium_longum_	0	0	0	0	0	0	0	0	0	0	0	0	0	0	0	0	0	0	0	0	0	0	0	0	33.0582	0	0	0	0	0	0	0	0	0	0	0	0	0	0	0	0	0	0	0	0	12.6159	0	0	ARO:1000001 ! process or component of antibiotic biology or chemistry|ARO:3000000 ! determinant of antibiotic resistance|ARO:3000185 ! antibiotic target protection protein|ARO:0000002 ! tetracycline resistance ribosomal protection protein
gi|1685112|ARO_3003042|PBP2b__Streptococcus_thermophilus_	0	0	0	0	0	0	0	0	0	0	0	0	0	0	0	0	0	0	2.09431	0	0	0	0	0	0	0	0	0	0	0	0	0	0	0	0	0	0	0	0	0	0	0	0	0	0	0	0	0	ARO:1000001 ! process or component of antibiotic biology or chemistry|ARO:3000000 ! determinant of antibiotic resistance|ARO:3000381 ! antibiotic target replacement protein|ARO:3003040 ! beta-lactam resistant penicillin-binding proteins
gi|1695688|ARO_3000318|mphB__Escherichia_coli_	0	0	0	0	0	0	0	0	0	0	0	0	0	0	0	0	0	0	0	0	0	0	0	0	0	0	0	0	0	0	0	0	0	0	0	0	0	0	0	0	0	0	0	0	0	0	0	0	ARO:1000001 ! process or component of antibiotic biology or chemistry|ARO:3000000 ! determinant of antibiotic resistance|ARO:3000557 ! antibiotic inactivation enzyme|ARO:3000201 ! macrolide inactivation enzyme|ARO:3000333 ! macrolide phosphotransferase (MPH)
gi|169633157|ARO_3000778|adeG__Acinetobacter_baumannii_SDF_	0	0	0	0	0	0	0	0	0	0	0	0	0	0	0	0	0	0	0	0	0	0	0	0	0	0	0	0	0	0	0	0	0	0	0	0	0	0	0	0	0	0	0	0	0	0	0	0	ARO:1000001 ! process or component of antibiotic biology or chemistry|ARO:3000000 ! determinant of antibiotic resistance|ARO:3000159 ! efflux pump conferring antibiotic resistance|ARO:3000748 ! subunit of efflux pump conferring antibiotic resistance
gi|169633158|ARO_3000777|adeF__Acinetobacter_baumannii_SDF_	0	0	0	0	0	0	0	0	0	0	0	0	0	0	0	0	0	0	0	0	0	0	0	0	0	0	0	0	0	0	0	0	0	0	0	0	0	0	0	5.91854	0	0	0	0	0	0	0	0	ARO:1000001 ! process or component of antibiotic biology or chemistry|ARO:3000000 ! determinant of antibiotic resistance|ARO:3000159 ! efflux pump conferring antibiotic resistance|ARO:3000748 ! subunit of efflux pump conferring antibiotic resistance
gi|169633903|ARO_3000814|mexT__Acinetobacter_baumannii_SDF_	0	0	0	0	0	0	0	0	0	0	0	0	0	0	0	0	0	0	22.3393	0	0	0	14.733	0	8.16252	0	0	0	0	0	0	0	0	15.3324	0	0	5.39922	0	0	0	0	0	0	0	0	0	0	0	ARO:1000001 ! process or component of antibiotic biology or chemistry|ARO:3000000 ! determinant of antibiotic resistance|ARO:3000451 ! gene modulating antibiotic efflux
gi|169795308|ARO_3000779|adeH__Acinetobacter_baumannii_AYE_	0	0	0	0	0	0	0	0	0	0	0	0	0	0	0	0	0	0	0	0	0	0	0	0	0	0	0	0	0	0	0	0	0	0	0	0	0	0	0	0	0	0	0	0	0	0	0	0	ARO:1000001 ! process or component of antibiotic biology or chemistry|ARO:3000000 ! determinant of antibiotic resistance|ARO:3000159 ! efflux pump conferring antibiotic resistance|ARO:3000748 ! subunit of efflux pump conferring antibiotic resistance
gi|169797580|ARO_3002854|dfrA1__Acinetobacter_baumannii_AYE_	0	0	0	0	0	0	0	0	0	0	0	0	0	0	0	0	0	0	0	0	0	0	0	0	0	0	0	0	0	0	0	0	0	0	0	0	0	0	0	0	0	0	0	0	0	0	0	0	ARO:1000001 ! process or component of antibiotic biology or chemistry|ARO:3000000 ! determinant of antibiotic resistance|ARO:3001217 ! trimethoprim resistance gene|ARO:3001218 ! trimethoprim resistant dihydrofolate reductase dfr
gi|17026026|ARO_3002202|IMP-11__Acinetobacter_baumannii_	0	0	0	0	0	0	0	0	0	0	0	0	0	0	0	0	0	0	0	0	0	0	0	0	0	0	0	0	0	0	0	0	0	0	0	0	0	0	0	0	0	0	0	0	0	0	0	0	ARO:1000001 ! process or component of antibiotic biology or chemistry|ARO:3000000 ! determinant of antibiotic resistance|ARO:3000129 ! beta-lactam resistance gene|ARO:3000001 ! beta-lactamase|ARO:3000004 ! class B (metallo-) beta-lactamase|ARO:3000568 ! subclass B1 (metallo-) beta-lactamase|ARO:3000020 ! IMP beta-lactamase
gi|17059619|ARO_3000478|tet33__Corynebacterium_glutamicum_	0	0	0	0	0	0	0	0	0	0	0	0	0	0	0	0	0	0	0	0	0	0	0	0	0	0	0	0	0	0	0	0	0	0	0	0	0	0	0	0	0	0	0	0	0	0	0	0	ARO:1000001 ! process or component of antibiotic biology or chemistry|ARO:3000000 ! determinant of antibiotic resistance|ARO:3000159 ! efflux pump conferring antibiotic resistance|ARO:0010002 ! major facilitator superfamily (MFS) antibiotic efflux pump
gi|1736787|ARO_3000829|baeS__Escherichia_coli_str__K-12_substr__W3110_	0	0	0	0	0	0	0	0	0	0	0	0	0	0	0	0	0	0	0	0	0	0	0	0	0	0	0	0	0	0	0	0	0	0	0	0	0	0	0	0	0	0	0	0	0	0	0	0	ARO:1000001 ! process or component of antibiotic biology or chemistry|ARO:3000000 ! determinant of antibiotic resistance|ARO:3000451 ! gene modulating antibiotic efflux|ARO:3000750 ! subunit of gene modulating antibiotic efflux
gi|17384002|ARO_3003015|dfrA19__Salmonella_enterica_subsp__enterica_serovar_Typhimurium_	0	0	0	0	0	0	0	0	0	0	0	0	0	0	0	0	0	0	0	0	0	0	0	0	0	0	0	0	0	0	0	0	0	0	0	0	0	0	0	0	0	0	0	0	0	0	0	0	ARO:1000001 ! process or component of antibiotic biology or chemistry|ARO:3000000 ! determinant of antibiotic resistance|ARO:3001217 ! trimethoprim resistance gene|ARO:3001218 ! trimethoprim resistant dihydrofolate reductase dfr
gi|1781318|ARO_3000592|ErmN__Streptomyces_fradiae_	0	0	0	0	0	0	0	0	0	0	0	0	0	0	0	0	0	0	0	0	0	0	0	0	0	0	0	0	0	0	0	0	0	0	0	0	0	0	0	0	0	0	0	0	0	0	0	0	ARO:1000001 ! process or component of antibiotic biology or chemistry|ARO:3000000 ! determinant of antibiotic resistance|ARO:3000315 ! macrolide resistance gene|ARO:3000560 ! Erm 23S ribosomal RNA methyltransferase
gi|1785985|ARO_3002884|iri__Rhodococcus_equi_	0	0	0	0	0	0	0	0	0	0	0	0	0	0	0	0	0	0	0	0	0	0	0	0	0	0	0	0	0	0	0	0	0	0	0	0	0	0	0	0	0	0	0	0	0	0	0	0	ARO:1000001 ! process or component of antibiotic biology or chemistry|ARO:3000000 ! determinant of antibiotic resistance|ARO:3000383 ! rifampin resistance gene|ARO:3000576 ! rifampin inactivation enzyme|ARO:3000445 ! rifampin monooxygenase
gi|1787374|ARO_3000835|phoQ__Escherichia_coli_str__K-12_substr__MG1655_	0	0	0	0	0	0	0	0	0	0	0	0	0	0	0	0	0	0	0	0	0	0	0	0	0	0	0	0	0	0	0	0	0	0	0	0	0	0	0	0	0	0	0	0	0	0	0	0	ARO:1000001 ! process or component of antibiotic biology or chemistry|ARO:3000000 ! determinant of antibiotic resistance|ARO:3000451 ! gene modulating antibiotic efflux|ARO:3000750 ! subunit of gene modulating antibiotic efflux
gi|1788340|ARO_3003577|PmrE__Escherichia_coli_str__K-12_substr__MG1655_	0	0	0	0	0	0	0	0	0	0	0	0	0	0	0	0	0	0	0	0	0	0	0	0	0	0	0	0	0	0	0	0	0	0	0	0	0	0	0	0	0	0	0	0	0	0	0	0	ARO:1000001 ! process or component of antibiotic biology or chemistry|ARO:3000000 ! determinant of antibiotic resistance|ARO:3003580 ! gene altering cell wall charge conferring antibiotic resistance
gi|1788390|ARO_3000793|mdtB__Escherichia_coli_str__K-12_substr__MG1655_	0	0	0	0	0	0	0	0	0	0	0	0	0	0	0	0	0	0	0	0	0	0	0	0	0	0	0	0	0	0	0	0	0	0	0	0	0	0	0	0	0	0	0	0	0	0	0	0	ARO:1000001 ! process or component of antibiotic biology or chemistry|ARO:3000000 ! determinant of antibiotic resistance|ARO:3000159 ! efflux pump conferring antibiotic resistance|ARO:3000748 ! subunit of efflux pump conferring antibiotic resistance
gi|1788391|ARO_3000794|mdtC__Escherichia_coli_str__K-12_substr__MG1655_	0	0	0	0	0	0	0	0	0	0	0	0	0	0	0	0	0	0	0	0	0	0	0	0	0	0	0	0	0	0	0	0	0	0	0	0	0	0	0	0	0	0	0	0	0	0	0	0	ARO:1000001 ! process or component of antibiotic biology or chemistry|ARO:3000000 ! determinant of antibiotic resistance|ARO:3000159 ! efflux pump conferring antibiotic resistance|ARO:3000748 ! subunit of efflux pump conferring antibiotic resistance
gi|1788392|ARO_3001330|mdtD__Escherichia_coli_str__K-12_substr__MG1655_	0	0	0	0	0	0	0	0	0	0	0	0	0	0	0	0	0	0	0	0	0	0	0	0	0	0	0	0	0	0	0	0	0	0	0	0	0	0	0	0	0	0	0	0	0	0	0	0	ARO:1000001 ! process or component of antibiotic biology or chemistry|ARO:3000000 ! determinant of antibiotic resistance|ARO:3000159 ! efflux pump conferring antibiotic resistance|ARO:0010002 ! major facilitator superfamily (MFS) antibiotic efflux pump
gi|1788588|ARO_3003578|PmrF__Escherichia_coli_str__K-12_substr__MG1655_	0	0	0	0	0	0	0	0	0	0	0	0	0	0	0	0	0	0	0	0	0	0	0	0	0	0	0	0	0	0	0	0	0	0	0	0	0	0	0	0	0	0	7.61395	0	0	0	0	0	ARO:1000001 ! process or component of antibiotic biology or chemistry|ARO:3000000 ! determinant of antibiotic resistance|ARO:3003580 ! gene altering cell wall charge conferring antibiotic resistance
gi|1788589|ARO_3002985|arnA__Escherichia_coli_str__K-12_substr__MG1655_	0	0	0	0	0	0	0	0	0	0	0	0	0	0	0	0	0	0	0	0	0	0	0	0	0	0	0	0	0	0	0	0	0	0	0	0	0	0	0	0	0	0	0	0	0	0	0	0	ARO:1000001 ! process or component of antibiotic biology or chemistry|ARO:3000000 ! determinant of antibiotic resistance|ARO:3002984 ! polymyxin resistance gene
gi|1788713|ARO_3000833|evgS__Escherichia_coli_str__K-12_substr__MG1655_	0	0	0	0	0	0	0	0	0	0	0	0	0	0	0	0	0	0	0	0	0	0	0	0	0	0	0	0	0	0	0	0	0	0	0	0	0	0	0	0	0	0	0	0	0	0	0	0	ARO:1000001 ! process or component of antibiotic biology or chemistry|ARO:3000000 ! determinant of antibiotic resistance|ARO:3000451 ! gene modulating antibiotic efflux|ARO:3000750 ! subunit of gene modulating antibiotic efflux
gi|1789042|ARO_3000074|emrB__Escherichia_coli_str__K-12_substr__MG1655_	0	0	0	0	0	0	0	0	0	0	0	0	0	0	0	0	0	0	0	0	0	0	0	0	0	0	0	0	0	0	0	0	0	0	0	0	0	0	0	0	0	0	0	0	0	0	0	0	ARO:1000001 ! process or component of antibiotic biology or chemistry|ARO:3000000 ! determinant of antibiotic resistance|ARO:3000159 ! efflux pump conferring antibiotic resistance|ARO:3000748 ! subunit of efflux pump conferring antibiotic resistance
gi|1789437|ARO_3002986|bacA__Escherichia_coli_str__K-12_substr__MG1655_	0	0	0	0	0	0	0	0	0	0	0	0	0	0	0	0	0	0	0	0	0	0	0	0	0	0	0	0	0	0	0	0	0	0	0	0	0	0	0	0	0	0	0	0	0	0	0	0	ARO:1000001 ! process or component of antibiotic biology or chemistry|ARO:3000000 ! determinant of antibiotic resistance|ARO:3000751 ! peptide antibiotic resistance gene|ARO:3003252 ! bacitracin resistance gene|ARO:3003398 ! undecaprenyl pyrophosphate related proteins conferring resistance to bacitracin
gi|1789664|ARO_3000656|acrS__Escherichia_coli_str__K-12_substr__MG1655_	0	0	0	0	0	0	0	0	0	0	0	0	0	0	0	0	0	0	0	0	0	0	0	0	0	0	0	0	0	0	0	0	0	0	0	0	0	0	0	0	0	0	0	0	0	0	0	0	ARO:1000001 ! process or component of antibiotic biology or chemistry|ARO:3000000 ! determinant of antibiotic resistance|ARO:3000451 ! gene modulating antibiotic efflux
gi|1789665|ARO_3000499|acrE__Escherichia_coli_str__K-12_substr__MG1655_	0	0	0	0	0	0	0	0	0	0	0	0	0	0	0	0	0	0	0	0	0	0	0	0	0	0	0	0	0	0	0	0	0	0	0	0	0	0	0	0	0	0	0	0	0	0	0	0	ARO:1000001 ! process or component of antibiotic biology or chemistry|ARO:3000000 ! determinant of antibiotic resistance|ARO:3000159 ! efflux pump conferring antibiotic resistance|ARO:3000748 ! subunit of efflux pump conferring antibiotic resistance
gi|1789666|ARO_3000502|acrF__Escherichia_coli_str__K-12_substr__MG1655_	0	0	0	0	0	0	0	0	0	0	0	0	0	0	0	0	0	0	0	0	0	0	0	0	0	0	0	0	0	0	0	0	0	0	0	0	0	0	0	0	0	0	0	0	0	0	0	0	ARO:1000001 ! process or component of antibiotic biology or chemistry|ARO:3000000 ! determinant of antibiotic resistance|ARO:3000159 ! efflux pump conferring antibiotic resistance|ARO:3000748 ! subunit of efflux pump conferring antibiotic resistance
gi|1789930|ARO_3000796|mdtF__Escherichia_coli_str__K-12_substr__MG1655_	0	0	0	0	0	0	0	0	0	0	0	0	0	0	0	0	0	0	0	0	0	0	0	0	0	0	0	0	0	0	0	0	0	0	0	0	0	0	0	0	0	0	0	0	0	0	0	0	ARO:1000001 ! process or component of antibiotic biology or chemistry|ARO:3000000 ! determinant of antibiotic resistance|ARO:3000159 ! efflux pump conferring antibiotic resistance|ARO:3000748 ! subunit of efflux pump conferring antibiotic resistance
gi|1790146|ARO_3001215|mdtL__Escherichia_coli_str__K-12_substr__MG1655_	0	0	0	0	0	0	0	0	0	0	0	0	0	0	0	0	0	0	0	0	0	0	0	0	0	0	0	0	0	0	0	0	0	0	0	0	0	0	0	0	0	0	0	0	10.5436	0	0	0	ARO:1000001 ! process or component of antibiotic biology or chemistry|ARO:3000000 ! determinant of antibiotic resistance|ARO:3000159 ! efflux pump conferring antibiotic resistance|ARO:0010002 ! major facilitator superfamily (MFS) antibiotic efflux pump
gi|1790794|ARO_3001214|mdtM__Escherichia_coli_str__K-12_substr__MG1655_	0	0	0	0	0	0	0	0	0	0	0	0	0	0	0	0	0	0	0	0	0	0	0	0	0	0	0	0	0	0	0	0	0	0	0	0	0	0	0	0	0	0	0	0	0	0	0	0	ARO:1000001 ! process or component of antibiotic biology or chemistry|ARO:3000000 ! determinant of antibiotic resistance|ARO:3000159 ! efflux pump conferring antibiotic resistance|ARO:0010002 ! major facilitator superfamily (MFS) antibiotic efflux pump
gi|1800070|ARO_3000027|emrA__Escherichia_coli_str__K-12_substr__W3110_	0	0	0	0	0	0	0	0	0	0	0	0	0	0	0	0	0	0	0	0	0	0	0	0	0	0	0	0	0	0	0	0	0	0	0	0	0	0	0	0	0	0	0	0	0	0	0	0	ARO:1000001 ! process or component of antibiotic biology or chemistry|ARO:3000000 ! determinant of antibiotic resistance|ARO:3000159 ! efflux pump conferring antibiotic resistance|ARO:3000748 ! subunit of efflux pump conferring antibiotic resistance
gi|1813571|ARO_3002526|AAC(2_)-Id__Mycobacterium_smegmatis_str__MC2_155_	0	0	0	0	0	0	0	0	0	0	0	0	0	0	0	0	0	0	0	0	0	0	0	0	0	0	0	0	0	0	0	0	0	0	0	0	0	0	0	0	0	0	0	0	0	0	0	0	ARO:1000001 ! process or component of antibiotic biology or chemistry|ARO:3000000 ! determinant of antibiotic resistance|ARO:3000104 ! aminoglycoside resistance gene|ARO:3000121 ! aminoglycoside acetyltransferase (AAC)|ARO:3000341 ! AAC(2')
gi|1835597|ARO_3002701|cmr__Corynebacterium_glutamicum_	0	0	0	0	0.272298	0	0	0	0.408905	0	0	0	0	0.170658	0	0	0	0	0.226072	0	0	0	0	0.347854	0.330417	0	0	0	0.354241	0	0.43109	0	0	1.86196	0	0	0	0.292972	0.498515	0	0	0	0	0	0	0	0	0.385976	ARO:1000001 ! process or component of antibiotic biology or chemistry|ARO:3000000 ! determinant of antibiotic resistance|ARO:3000159 ! efflux pump conferring antibiotic resistance|ARO:0010002 ! major facilitator superfamily (MFS) antibiotic efflux pump|ARO:3001213 ! chloramphenicol resistance efflux pump
gi|18378615|ARO_3002681|catB9__Vibrio_cholerae_	0	0	0	0	0	0	0	0	0	0	0	0	0	0	0	0	0	0	0	0	0	0	0	0	0	0	0	0	0	0	0	0	0	0	0	0	0	0	0	0	0	0	0	0	0	0	0	0	ARO:1000001 ! process or component of antibiotic biology or chemistry|ARO:3000000 ! determinant of antibiotic resistance|ARO:3000557 ! antibiotic inactivation enzyme|ARO:3000122 ! chloramphenicol acetyltransferase (CAT)
gi|18390036|ARO_3000605|Erm(36)__Micrococcus_luteus_	0	0	0	0	0	0	0	0	0	0	0	0	0	0	0	0	0	0	2.30374	0	0	0	0	0	4.59142	0	0	0	0	0	0	0	0	0	0	0	0	0	0	0	0	0	0	0	0	0	0	0	ARO:1000001 ! process or component of antibiotic biology or chemistry|ARO:3000000 ! determinant of antibiotic resistance|ARO:3000315 ! macrolide resistance gene|ARO:3000560 ! Erm 23S ribosomal RNA methyltransferase
gi|1841438|ARO_3002157|FOX-3__Klebsiella_oxytoca_	0	0	0	0	0	0	0	0	0	0	0	0	0	0	0	0	0	0	0	0	0	0	0	0	0	0	0	0	0	0	0	0	0	0	0	0	0	0	0	0	0	0	0	0	0	0	0	0	ARO:1000001 ! process or component of antibiotic biology or chemistry|ARO:3000000 ! determinant of antibiotic resistance|ARO:3000129 ! beta-lactam resistance gene|ARO:3000001 ! beta-lactamase|ARO:3000076 ! class C beta-lactamase|ARO:3000067 ! FOX beta-lactamase
gi|1854639|ARO_3002636|APH(2__)-IIIa__Enterococcus_gallinarum_	0	0	0	0	0	0	0	0	0	0	0	0	0	0	0	0	0	0	0	0	0	0	0	0	0	0	0	0	0	0	0	0	0	0	0	0	0	0	0	0	0	0	0	0	0	0	0	0	ARO:1000001 ! process or component of antibiotic biology or chemistry|ARO:3000000 ! determinant of antibiotic resistance|ARO:3000557 ! antibiotic inactivation enzyme|ARO:3000114 ! aminoglycoside phosphotransferase (APH)|ARO:3000128 ! APH(2'')
gi|186470129|ARO_3002804|FosA2__Enterobacter_cloacae_	0	0	0	0	0	0	0	0	0	0	0	0	0	0	0	0	0	0	0	0	0	0	0	0	0	0	0	0	0	0	0	0	0	0	0	0	0	0	0	0	0	0	0	0	0	0	0	0	ARO:1000001 ! process or component of antibiotic biology or chemistry|ARO:3000000 ! determinant of antibiotic resistance|ARO:3000271 ! fosfomycin resistance gene|ARO:3000342 ! fosfomycin inactivation enzyme|ARO:3000133 ! fosfomycin thiol transferase
gi|187763217|ARO_3000572|tet42__Micrococcus_sp__SMCC_G887_	0	0	0	0	0	0	0	0	0	0	0	0	0	0	0	0	0	0	0	0	0	0	0	0	0	0	0	0	0	0	0	0	0	0	0	0	0	0	0	0	0	0	0	0	0	0	0	0	ARO:1000001 ! process or component of antibiotic biology or chemistry|ARO:3000000 ! determinant of antibiotic resistance|ARO:3000472 ! tetracycline resistance gene|ARO:3000239 ! tetracycline resistance efflux pump
gi|188504041|ARO_3002848|arr-3__Escherichia_coli_	0	0	0	0	0	0	0	0	0	0	0	0	0	0	0	0	0	0	0	0	0	0	0	0	0	0	0	0	0	0	0	0	0	0	0	0	0	0	0	0	0	0	0	0	0	0	0	0	ARO:1000001 ! process or component of antibiotic biology or chemistry|ARO:3000000 ! determinant of antibiotic resistance|ARO:3000383 ! rifampin resistance gene|ARO:3000576 ! rifampin inactivation enzyme|ARO:3000390 ! rifampin ADP-ribosyltransferase (Arr)
gi|18958401|ARO_3002600|AAC(3)-Ib_AAC(6_)-Ib____Pseudomonas_aeruginosa_	0	0	0	0	0	0	0	0	0	0	0	0	0	0	0	0	0	0	0	0	0	0	0	0	0	0	0	0	0	0	0	0	0	0	0	0	0	0	0	0	0	0	0	0	0	0	0	0	ARO:1000001 ! process or component of antibiotic biology or chemistry|ARO:3000000 ! determinant of antibiotic resistance|ARO:3000104 ! aminoglycoside resistance gene|ARO:3000121 ! aminoglycoside acetyltransferase (AAC)|ARO:3000322 ! AAC(3)|ARO:3002530 ! AAC(3)-Ib
gi|190364829|ARO_3002366|PER-4__Proteus_vulgaris_	0	0	0	0	0	0	0	0	0	0	0	0	0	0	0	0	0	0	0	0	0	0	0	0	0	0	0	0	0	0	0	0	0	0	0	0	0	0	0	0	0	0	0	0	0	0	0	0	ARO:1000001 ! process or component of antibiotic biology or chemistry|ARO:3000000 ! determinant of antibiotic resistance|ARO:3000129 ! beta-lactam resistance gene|ARO:3000001 ! beta-lactamase|ARO:3000078 ! class A beta-lactamase|ARO:3000056 ! PER beta-lactamase
gi|1927195|ARO_3002824|ErmV__Streptomyces_viridochromogenes_	0	0	0	0	0	0	0	0	0	0	0	0	0	0	0	0	0	0	0	0	0	0	0	0	0	0	0	0	0	0	0	0	0	0	0	0	0	0	0	0	0	0	0	0	0	0	0	0	ARO:1000001 ! process or component of antibiotic biology or chemistry|ARO:3000000 ! determinant of antibiotic resistance|ARO:3000315 ! macrolide resistance gene|ARO:3000560 ! Erm 23S ribosomal RNA methyltransferase
gi|193409925|ARO_3002616|aadA16__Escherichia_coli_	0	0	0	0	0	0	0	0	0	0	0	0	0	0	0	0	0	0	0	0	0	0	0	0	0	0	0	0	0	0	0	0	0	0	0	0	0	0	0	0	0	0	0	0	0	0	0	0	ARO:1000001 ! process or component of antibiotic biology or chemistry|ARO:3000000 ! determinant of antibiotic resistance|ARO:3000104 ! aminoglycoside resistance gene|ARO:3000218 ! aminoglycoside nucleotidyltransferase (ANT)|ARO:3000232 ! ANT(3'')-Ia
gi|194099140|ARO_3000817|mtrR__Neisseria_gonorrhoeae_NCCP11945_	0	0	0	0	0	0	0	0	0	0	0	0	0	0	0	0	0	0	0	0	0	0	0	0	0	0	0	0	0	0	0	0	0	0	0	0	0	0	0	0	0	0	0	0	0	0	0	0	ARO:1000001 ! process or component of antibiotic biology or chemistry|ARO:3000000 ! determinant of antibiotic resistance|ARO:3000451 ! gene modulating antibiotic efflux
gi|197296820|ARO_3002482|LRA-1__uncultured_bacterium_BLR1_	0	0	0	0	0	0	0	0	0	0	0	0	0	0	0	0	0	0.771197	0	0	0	0	0	0	0	0	0	0	0	0	0	1.23993	0	0	0	0	0	0	0	0	0	0	0	0	0	0	0	0	ARO:1000001 ! process or component of antibiotic biology or chemistry|ARO:3000000 ! determinant of antibiotic resistance|ARO:3000129 ! beta-lactam resistance gene|ARO:3000001 ! beta-lactamase|ARO:3000004 ! class B (metallo-) beta-lactamase|ARO:3000571 ! subclass B3 (metallo-) beta-lactamase|ARO:3000852 ! LRA beta-lactamase
gi|197296825|ARO_3002485|LRA-2__uncultured_bacterium_BLR2_	0	0	0	0	0	0	0	0	0	0	0	0	0	0	0	0	0	0	0	0	0	0	0	0	0	0	0	0	0	0	0	0	0	0	0	0	0	0	0	0	0	0	0	0	0	0	0	0	ARO:1000001 ! process or component of antibiotic biology or chemistry|ARO:3000000 ! determinant of antibiotic resistance|ARO:3000129 ! beta-lactam resistance gene|ARO:3000001 ! beta-lactamase|ARO:3000004 ! class B (metallo-) beta-lactamase|ARO:3000571 ! subclass B3 (metallo-) beta-lactamase|ARO:3000852 ! LRA beta-lactamase
gi|197296827|ARO_3002510|LRA-3__uncultured_bacterium_BLR3_	0	0	0	0	0	0	0	0	0	0	0	0	0	0	0	0	0	0	0	0	0	0	0	0	0	0	0	0	0	0	0	0	0	0	0	0	0	0	0	0	0	0	0	0	0	0	0	0	ARO:1000001 ! process or component of antibiotic biology or chemistry|ARO:3000000 ! determinant of antibiotic resistance|ARO:3000129 ! beta-lactam resistance gene|ARO:3000001 ! beta-lactamase|ARO:3000004 ! class B (metallo-) beta-lactamase|ARO:3000571 ! subclass B3 (metallo-) beta-lactamase|ARO:3000852 ! LRA beta-lactamase
gi|197296828|ARO_3002487|LRA-8__uncultured_bacterium_BLR8_	0	0	0	0	0	0	0	0	0	0	0	0	0	0	0	0	0	0	0	0	0	0	0	0	0	0	0	0	0	0	0	0	0	0	0	0	0	0	0	0	0	0	0	0	0	0	0	0	ARO:1000001 ! process or component of antibiotic biology or chemistry|ARO:3000000 ! determinant of antibiotic resistance|ARO:3000129 ! beta-lactam resistance gene|ARO:3000001 ! beta-lactamase|ARO:3000004 ! class B (metallo-) beta-lactamase|ARO:3000571 ! subclass B3 (metallo-) beta-lactamase|ARO:3000852 ! LRA beta-lactamase
gi|197296829|ARO_3002488|LRA-9__uncultured_bacterium_BLR9_	0	0	0	0	0	0	0	0	0	0	0	0	0	0	0	0	0	0	0	0	0	0	0	0	0	0	0	0	0	0	0	0	0	0	0	0	0	0	0	0	0	0	0	0	0	0	0	0	ARO:1000001 ! process or component of antibiotic biology or chemistry|ARO:3000000 ! determinant of antibiotic resistance|ARO:3000129 ! beta-lactam resistance gene|ARO:3000001 ! beta-lactamase|ARO:3000004 ! class B (metallo-) beta-lactamase|ARO:3000571 ! subclass B3 (metallo-) beta-lactamase|ARO:3000852 ! LRA beta-lactamase
gi|197296830|ARO_3002511|LRA-12__uncultured_bacterium_BLR12_	0	0	0	0	0	0	0	0	0	0	0	0	0	0	0	0	0	0	0	0	0	0	0	0	0	0	0	0	0	0	0	0	0	0	0	0	0	0	0	0	0	0	0	0	0	0	0	0	ARO:1000001 ! process or component of antibiotic biology or chemistry|ARO:3000000 ! determinant of antibiotic resistance|ARO:3000129 ! beta-lactam resistance gene|ARO:3000001 ! beta-lactamase|ARO:3000004 ! class B (metallo-) beta-lactamase|ARO:3000571 ! subclass B3 (metallo-) beta-lactamase|ARO:3000852 ! LRA beta-lactamase
gi|197296831|ARO_3002484|LRA-13__uncultured_bacterium_BLR13_	0	0	0	0	0	0	0	0	0	0	0	0	0	0	0	0	0	0	0	0	0	0	0	0	0	0	0	0	0	0	0	0	0	0	0	0	0	0	0	0	0	0	0	0	0	0	0	0	ARO:1000001 ! process or component of antibiotic biology or chemistry|ARO:3000000 ! determinant of antibiotic resistance|ARO:3000129 ! beta-lactam resistance gene|ARO:3000001 ! beta-lactamase|ARO:3000004 ! class B (metallo-) beta-lactamase|ARO:3000571 ! subclass B3 (metallo-) beta-lactamase|ARO:3000852 ! LRA beta-lactamase
gi|197296834|ARO_3002512|LRA-17__uncultured_bacterium_BLR17_	0	0	0	0	0	0	0	0	0	0	0	0	0	0	0	0	0	0	0	0	0	0	0	0	0	0	0	0	0	0	0	0	0	0	0	0	0	0	0	0	0	0	0	0	0	0	0	0	ARO:1000001 ! process or component of antibiotic biology or chemistry|ARO:3000000 ! determinant of antibiotic resistance|ARO:3000129 ! beta-lactam resistance gene|ARO:3000001 ! beta-lactamase|ARO:3000004 ! class B (metallo-) beta-lactamase|ARO:3000571 ! subclass B3 (metallo-) beta-lactamase|ARO:3000852 ! LRA beta-lactamase
gi|197296837|ARO_3002492|LRA-18__uncultured_bacterium_BLR18_	0	0	0	0	0	0	0	0	0	0	0	0	0	0	0	0	0	0	0	0	0	0	0	0	0	0	0	0	0	0	0	0	0	0	0	0	0	0	0	0	0	0	0	0	0	0	0	0	ARO:1000001 ! process or component of antibiotic biology or chemistry|ARO:3000000 ! determinant of antibiotic resistance|ARO:3000129 ! beta-lactam resistance gene|ARO:3000001 ! beta-lactamase|ARO:3000004 ! class B (metallo-) beta-lactamase|ARO:3000571 ! subclass B3 (metallo-) beta-lactamase|ARO:3000852 ! LRA beta-lactamase
gi|197296842|ARO_3002483|LRA-5__uncultured_bacterium_BLR5_	0	0	0	0	0	0	0	0	0	0	0	0	0	0	0	0	0	0	0	0	0	0	0	0	0	0	0	0	0	0	0	0	0	0	0	0	0	0	0	0	0	0	0	0	0	0	0	0	ARO:1000001 ! process or component of antibiotic biology or chemistry|ARO:3000000 ! determinant of antibiotic resistance|ARO:3000129 ! beta-lactam resistance gene|ARO:3000001 ! beta-lactamase|ARO:3000004 ! class B (metallo-) beta-lactamase|ARO:3000571 ! subclass B3 (metallo-) beta-lactamase|ARO:3000852 ! LRA beta-lactamase
gi|197296845|ARO_3002513|LRA-19__uncultured_bacterium_BLR19_	0	0	0	0	0	0	0	0	0	0	0	0	0	0	0	0	0	0	0	0	0	0	0	0	0	0	0	0	0	0	0	0	0	0	0	0	0	0	0	0	0	0	0	0	0	0	0	0	ARO:1000001 ! process or component of antibiotic biology or chemistry|ARO:3000000 ! determinant of antibiotic resistance|ARO:3000129 ! beta-lactam resistance gene|ARO:3000001 ! beta-lactamase|ARO:3000004 ! class B (metallo-) beta-lactamase|ARO:3000571 ! subclass B3 (metallo-) beta-lactamase|ARO:3000852 ! LRA beta-lactamase
gi|197724705|ARO_3002429|OKP-A-12__Klebsiella_pneumoniae_	0	0	0	0	0	0	0	0	0	0	0	0	0	0	0	0	0	0	0	0	0	0	0	0	3.06095	0	0	0	0	0	0	0	0	0	0	0	0	0	0	0	0	0	0	0	0	0	0	0	ARO:1000001 ! process or component of antibiotic biology or chemistry|ARO:3000000 ! determinant of antibiotic resistance|ARO:3000129 ! beta-lactam resistance gene|ARO:3000001 ! beta-lactamase|ARO:3000078 ! class A beta-lactamase|ARO:3002417 ! OKP beta-lactamase
gi|19773454|ARO_3002670|cat__Photobacterium_damselae_subsp__piscicida_	0	0	0	0	0	0	0	0	0	0	0	0	0	0	0	0	0	0	0	0	0	0	0	0	0	0	0	0	0	0	0	0	0	0	0	0	0	0	0	0	0	0	0	0	0	0	0	0	ARO:1000001 ! process or component of antibiotic biology or chemistry|ARO:3000000 ! determinant of antibiotic resistance|ARO:3000557 ! antibiotic inactivation enzyme|ARO:3000122 ! chloramphenicol acetyltransferase (CAT)
gi|198447194|ARO_3000853|AIM-1__Pseudomonas_aeruginosa_	0	0	0	0	0	0	0	0	0	0	0	0	0	0	0	0	0	0	0	0	0	0	0	0	0	0	0	0	0	0	0	0	0	0	0	0	0	0	0	0	0	0	0	0	0	0	0	0	ARO:1000001 ! process or component of antibiotic biology or chemistry|ARO:3000000 ! determinant of antibiotic resistance|ARO:3000129 ! beta-lactam resistance gene|ARO:3000001 ! beta-lactamase|ARO:3000004 ! class B (metallo-) beta-lactamase|ARO:3000571 ! subclass B3 (metallo-) beta-lactamase
gi|19879250|ARO_3000840|JOHN-1_beta-lactamase__Flavobacterium_johnsoniae_UW101_	0	0	0	0	0	0	0	0	0	0	0	0	0	0	0	0	0	0	0	0	0	0	0	0	0	0	0	0	0	0	0	0	0	0	0	0	0	0	0	0	0	0	0	0	0	0	0	0	ARO:1000001 ! process or component of antibiotic biology or chemistry|ARO:3000000 ! determinant of antibiotic resistance|ARO:3000129 ! beta-lactam resistance gene|ARO:3000001 ! beta-lactamase|ARO:3000004 ! class B (metallo-) beta-lactamase|ARO:3000568 ! subclass B1 (metallo-) beta-lactamase
gi|2065035|ARO_3000579|BlaB_beta-lactamase__Elizabethkingia_meningoseptica_	0	0	0	0	0	0	0	0	0	0	0	0	0	0	0	0	0	0	0	0	0	0	0	0	0	0	0	0	0	0	0	0	0	0	0	0	0	0	0	0	0	0	0	0	0	0	0	0	ARO:1000001 ! process or component of antibiotic biology or chemistry|ARO:3000000 ! determinant of antibiotic resistance|ARO:3000129 ! beta-lactam resistance gene|ARO:3000001 ! beta-lactamase|ARO:3000004 ! class B (metallo-) beta-lactamase|ARO:3000568 ! subclass B1 (metallo-) beta-lactamase
gi|208436667|ARO_3002575|AAC(6_)-Iai__Pseudomonas_aeruginosa_	0	0	0	0	0	0	0	0	0	0	0	0	0	0	0	0	0	0	0	0	0	0	0	0	0	0	0	0	0	0	0	0	0	0	0	0	0	0	0	0	0	0	0	0	0	0	0	0	ARO:1000001 ! process or component of antibiotic biology or chemistry|ARO:3000000 ! determinant of antibiotic resistance|ARO:3000104 ! aminoglycoside resistance gene|ARO:3000121 ! aminoglycoside acetyltransferase (AAC)|ARO:3000345 ! AAC(6')
gi|208972755|ARO_3002859|dfrA14__Escherichia_coli_	0	0	0	0	0	0	0	0	0	0	0	0	0	0	0	0	0	0	0	0	0	0	0	0	0	0	0	0	0	0	0	0	0	2.75984	0	0	0	0	0	0	0	0	0	0	0	0	0	0	ARO:1000001 ! process or component of antibiotic biology or chemistry|ARO:3000000 ! determinant of antibiotic resistance|ARO:3001217 ! trimethoprim resistance gene|ARO:3001218 ! trimethoprim resistant dihydrofolate reductase dfr
gi|2109270|ARO_3003009|ceoA__Burkholderia_cepacia_	0	0	0	0	0	0	0	0	0	0	0	0	0	0	0	0	0	0	0	0	0	0	0	0	0	0	0	0	0	0	0	0	0	0	0	0	0	0	0	0	0	0	0	0	0	0	0	0	ARO:1000001 ! process or component of antibiotic biology or chemistry|ARO:3000000 ! determinant of antibiotic resistance|ARO:3000159 ! efflux pump conferring antibiotic resistance|ARO:3000748 ! subunit of efflux pump conferring antibiotic resistance
gi|2109271|ARO_3003010|ceoB__Burkholderia_cepacia_	0	0	0	0	0	0	0	0	0	0	0	0	0	0	0	0	0	0	0	0	0	0	0	0	0	0	0	0	0	0	0	0	0	0	0	0	0	0	0	0	0	0	0	0	0	0	0	0	ARO:1000001 ! process or component of antibiotic biology or chemistry|ARO:3000000 ! determinant of antibiotic resistance|ARO:3000159 ! efflux pump conferring antibiotic resistance|ARO:3000748 ! subunit of efflux pump conferring antibiotic resistance
gi|21262148|ARO_3001770|OXA-43__Burkholderia_pseudomallei_	0	0	0	0	0	0	0	0	0	0	0	0	0	0	0	0	0	0	0	0	0	0	0	0	0	0	0	0	0	0	0	0	0	0	0	0	0	0	0	0	0	0	0	0	0	0	0	0	ARO:1000001 ! process or component of antibiotic biology or chemistry|ARO:3000000 ! determinant of antibiotic resistance|ARO:3000129 ! beta-lactam resistance gene|ARO:3000001 ! beta-lactamase|ARO:3000075 ! class D beta-lactamase|ARO:3000017 ! OXA beta-lactamase
gi|213157677|ARO_3000780|adeI__Acinetobacter_baumannii_AB0057_	0	0	0	0	0	0	0	0	0	0	0	0	0	0	0	0	0	0	0	0	0	0	0	0	0	0	0	0	0	0	0	0	0	0	0	0	0	0	0	0	0	0	0	0	0	0	0	0	ARO:1000001 ! process or component of antibiotic biology or chemistry|ARO:3000000 ! determinant of antibiotic resistance|ARO:3000159 ! efflux pump conferring antibiotic resistance|ARO:3000748 ! subunit of efflux pump conferring antibiotic resistance
gi|214027186|ARO_3000413|sul3__Escherichia_coli_	0	0	0	0	0	0	0	0	0	0	0	0	0	0	0	0	0	0	0	0	0	0	0	0	0	0	0	0	0	0	0	0	0	0	0	0	0	0	0	0	0	0	0	0	0	0	0	0	ARO:1000001 ! process or component of antibiotic biology or chemistry|ARO:3000000 ! determinant of antibiotic resistance|ARO:3000381 ! antibiotic target replacement protein
gi|214027188|ARO_3003107|mefB__Escherichia_coli_	0	0	0	0	0	0	0	0	0	0	0	0	0	0	0	0	0	0	0	0	0	0	0	0	0	0	0	0	0	0	0	0	0	0	0	0	0	0	0	0	0	0	0	0	0	0	0	0	ARO:1000001 ! process or component of antibiotic biology or chemistry|ARO:3000000 ! determinant of antibiotic resistance|ARO:3000159 ! efflux pump conferring antibiotic resistance|ARO:0010002 ! major facilitator superfamily (MFS) antibiotic efflux pump|ARO:3000747 ! mef
gi|21425614|ARO_3000855|CAU-1_beta-lactamase__Caulobacter_vibrioides_	0	0	0	0	0	0	0	0	0	0	0	0	0	0	0	0	0	0	0	0	0	0	0	0	0	0	0	0	0	0	0	0	0	0	0	0	0	0	0	0	0	0	0	0	0	0	0	0	ARO:1000001 ! process or component of antibiotic biology or chemistry|ARO:3000000 ! determinant of antibiotic resistance|ARO:3000129 ! beta-lactam resistance gene|ARO:3000001 ! beta-lactamase|ARO:3000004 ! class B (metallo-) beta-lactamase|ARO:3000571 ! subclass B3 (metallo-) beta-lactamase
gi|2145190|ARO_3002662|APH(9)-Ia__Legionella_pneumophila_130b_	0	0	0	0	0	0	0	0	0	0	0	0	0	0	0	0	0	0	0	0	0	0	0	0	0	0	0	0	0	0	0	0	0	0	0	0	0	0	0	0	0	0	0	0	0	0	0	0	ARO:1000001 ! process or component of antibiotic biology or chemistry|ARO:3000000 ! determinant of antibiotic resistance|ARO:3000557 ! antibiotic inactivation enzyme|ARO:3000114 ! aminoglycoside phosphotransferase (APH)|ARO:3000153 ! APH(9)
gi|2149411|ARO_3001413|OXA-18__Pseudomonas_aeruginosa_	0	0	0	0	0	0	0	0	0	0	0	0	0	0	0	0	0	0	0	0	0	0	0	0	0	0	0	0	0	0	0	0	0	0	0	0	0	0	0	0	0	0	0	0	0	0	0	0	ARO:1000001 ! process or component of antibiotic biology or chemistry|ARO:3000000 ! determinant of antibiotic resistance|ARO:3000129 ! beta-lactam resistance gene|ARO:3000001 ! beta-lactamase|ARO:3000075 ! class D beta-lactamase|ARO:3000017 ! OXA beta-lactamase
gi|215482849|ARO_3000768|abeS__Acinetobacter_baumannii_AB307-0294_	0	0	0	0	0	0	0	0	0	0	0	0	0	0	0	0	0	0	0	0	0	0	0	0	0	0	0	0	0	0	0	0	0	0	0	0	0	0	0	0	0	0	0	0	0	0	0	0	ARO:1000001 ! process or component of antibiotic biology or chemistry|ARO:3000000 ! determinant of antibiotic resistance|ARO:3000159 ! efflux pump conferring antibiotic resistance|ARO:0010003 ! small multidrug resistance (SMR) antibiotic efflux pump
gi|215483397|ARO_3000774|adeA__Acinetobacter_baumannii_AB307-0294_	0	0	0	0	0	0	0	0	0	0	0	0	0	0	0	0	0	0	0	0	0	0	0	0	0	0	0	0	0	0	0	0	0	0	0	0	0	0	0	0	0	0	0	0	0	0	0	0	ARO:1000001 ! process or component of antibiotic biology or chemistry|ARO:3000000 ! determinant of antibiotic resistance|ARO:3000159 ! efflux pump conferring antibiotic resistance|ARO:3000748 ! subunit of efflux pump conferring antibiotic resistance
gi|215483398|ARO_3000775|adeB__Acinetobacter_baumannii_AB307-0294_	0	0	0	0	0	0	0	0	0	0	0	0	0	0	0	0	0	0	0	0	0	0	0	0	0	0	0	0	0	0	0	0	0	0	0	0	0	0	0	0	0	0	0	0	0	0	0	0	ARO:1000001 ! process or component of antibiotic biology or chemistry|ARO:3000000 ! determinant of antibiotic resistance|ARO:3000159 ! efflux pump conferring antibiotic resistance|ARO:3000748 ! subunit of efflux pump conferring antibiotic resistance
gi|216881|ARO_3003552|fusB__Burkholderia_cepacia_	0	0	0	0	0	0	0	0	0	0	0	0	0	0	0	0	0	0	0	0	0	0	0	0	0	0	0	0	0	0	0	0	0	0	0	0	0	0	0	0	0	0	0	0	0	0	0	0	ARO:1000001 ! process or component of antibiotic biology or chemistry|ARO:3000000 ! determinant of antibiotic resistance|ARO:3003024 ! fusidic acid resistance gene|ARO:3003025 ! fusidic acid inactivation enzyme
gi|218202688|ARO_3002787|QnrC__Proteus_mirabilis_	0	0	0	0	0	0	0	0	0	0	0	0	0	0	0	0	0	0	0	0	0	0	0	0	0	0	0	0	0	0	0	0	0	0	0	0	0	0	0	0	0	0	0	0	0	0	0	0	ARO:1000001 ! process or component of antibiotic biology or chemistry|ARO:3000000 ! determinant of antibiotic resistance|ARO:3000102 ! fluoroquinolone resistance gene|ARO:3000419 ! fluoroquinolone resistance protein
gi|218562026|ARO_3000526|cmeR__Campylobacter_jejuni_subsp__jejuni_NCTC_11168_	0	0	0	0	0	0	0	0	0	0	0	0	0	0	0	0	0	0	0	0	0	0	0	0	0	0	0	0	0	0	0	0	0	0	0	0	0	0	0	0	0	0	0	0	0	0	0	0	ARO:1000001 ! process or component of antibiotic biology or chemistry|ARO:3000000 ! determinant of antibiotic resistance|ARO:3000451 ! gene modulating antibiotic efflux
gi|21885347|ARO_3000412|sul2__Vibrio_cholerae_	0	0	0	0	0	0	0	0	0	0	0	0	0	0	0	0	0	0	0	0	0	0	0	0	0	0	0	0	0	0	0	0	0	0	0	0	0	0	0	0	0	0	0	0	0	0	0	0	ARO:1000001 ! process or component of antibiotic biology or chemistry|ARO:3000000 ! determinant of antibiotic resistance|ARO:3000381 ! antibiotic target replacement protein
gi|21898663|ARO_3002695|cmlA5__uncultured_bacterium_	0	0	0	0	0	0	0	0	0	0	0	0	0	0	0	0	0	0	0	0	0	0	0	0	0	0	0	0	0	0	0	0	0	0	0	0	0	0	0	0	0	0	0	0	0	0	0	0	ARO:1000001 ! process or component of antibiotic biology or chemistry|ARO:3000000 ! determinant of antibiotic resistance|ARO:3000159 ! efflux pump conferring antibiotic resistance|ARO:0010002 ! major facilitator superfamily (MFS) antibiotic efflux pump|ARO:3001213 ! chloramphenicol resistance efflux pump
gi|220901854|ARO_3002928|vanRM__Enterococcus_faecium_	0	0	0	0	0	0	0	0	0	0	0	0	0	0	0	0	0	0	0	0	0	0	0	0	0	0	0	0	0	0	0	0	0	0	0	0	0	0	0	0	0	0	0	0	0	0	0	0	ARO:1000001 ! process or component of antibiotic biology or chemistry|ARO:3000000 ! determinant of antibiotic resistance|ARO:3000012 ! gene conferring antibiotic resistance via molecular bypass|ARO:3002976 ! gene associated with a glycopeptide resistance cluster|ARO:3002905 ! VanS-VanR two-component regulatory system|ARO:3000574 ! vanR
gi|220901855|ARO_3002939|vanSM__Enterococcus_faecium_	0	0	0	0	0	0	0	0	0	0	0	0	0	0	0	0	0	0	0	0	0	0	0	0	0	0	0	0	0	0	0	0	0	0	0	0	0	0	0	0	0	0	0	0	0	0	0	0	ARO:1000001 ! process or component of antibiotic biology or chemistry|ARO:3000000 ! determinant of antibiotic resistance|ARO:3000012 ! gene conferring antibiotic resistance via molecular bypass|ARO:3002976 ! gene associated with a glycopeptide resistance cluster|ARO:3002905 ! VanS-VanR two-component regulatory system|ARO:3000071 ! vanS
gi|220901856|ARO_3002961|vanYM__Enterococcus_faecium_	0	0	0	0	0	0	0	0	0	0	0	0	0	0	0	0	0	0	0	0	0	0	0	0	0	0	0	0	0	0	0	0	0	0	0	0	0	0	0	0	0	0	0	0	0	0	0	0	ARO:1000001 ! process or component of antibiotic biology or chemistry|ARO:3000000 ! determinant of antibiotic resistance|ARO:3000012 ! gene conferring antibiotic resistance via molecular bypass|ARO:3002976 ! gene associated with a glycopeptide resistance cluster|ARO:3000077 ! vanY
gi|220901857|ARO_3002947|vanHM__Enterococcus_faecium_	0	0	0	0	0	0	0	0	0	0	0	0	0	0	0	0	0	0	0	0	0	0	0	0	0	0	0	0	0	0	0	0	0	0	0	0	0	0	0	0	0	0	0	0	0	0	0	0	ARO:1000001 ! process or component of antibiotic biology or chemistry|ARO:3000000 ! determinant of antibiotic resistance|ARO:3000012 ! gene conferring antibiotic resistance via molecular bypass|ARO:3002976 ! gene associated with a glycopeptide resistance cluster|ARO:3000006 ! vanH
gi|220901858|ARO_3002911|vanM__Enterococcus_faecium_	0	0	0	0	0	0	0	0	0	0	0	0	0	0	0	0	3.08317	0	0	0	4.59449	0	0	0	0	0	0	0	0	0	0	0	0	0	0	0	0	0	0	0	0	0	0	0	0	0	0	0	ARO:1000001 ! process or component of antibiotic biology or chemistry|ARO:3000000 ! determinant of antibiotic resistance|ARO:3000012 ! gene conferring antibiotic resistance via molecular bypass|ARO:3002976 ! gene associated with a glycopeptide resistance cluster|ARO:3002906 ! van ligase|ARO:3002978 ! D-Ala-D-Lac ligase
gi|220901859|ARO_3002953|vanXM__Enterococcus_faecium_	0	0	0	0	0	0	0	0	0	0	0	0	0	0	0	0	0	0	0	0	0	0	0	0	0	0	0	0	0	0	0	0	0	0	0	0	0	0	0	0	0	0	0	0	0	0	0	0	ARO:1000001 ! process or component of antibiotic biology or chemistry|ARO:3000000 ! determinant of antibiotic resistance|ARO:3000012 ! gene conferring antibiotic resistance via molecular bypass|ARO:3002976 ! gene associated with a glycopeptide resistance cluster|ARO:3000011 ! vanX
gi|22203990|ARO_3002594|AAC(6_)-IIa__Salmonella_enterica_subsp__enterica_serovar_Typhi_	0	0	0	0	0	0	0	0	0	0	0	0	0	0	0	0	0	0	0	0	0	0	0	0	0	0	0	0	0	0	0	0	0	0	0	0	0	0	0	0	0	0	0	0	0	0	0	0	ARO:1000001 ! process or component of antibiotic biology or chemistry|ARO:3000000 ! determinant of antibiotic resistance|ARO:3000104 ! aminoglycoside resistance gene|ARO:3000121 ! aminoglycoside acetyltransferase (AAC)|ARO:3000345 ! AAC(6')
gi|222820565|ARO_3001800|OXA-226__Pseudomonas_aeruginosa_	0	0	0	0	0	0	0	0	0	0	0	0	0	0	0	0	0	0	0	0	0	0	0	0	0	0	0	0	0	0	0	0	0	0	0	0	0	0	0	0	0	0	0	0	0	0	0	0	ARO:1000001 ! process or component of antibiotic biology or chemistry|ARO:3000000 ! determinant of antibiotic resistance|ARO:3000129 ! beta-lactam resistance gene|ARO:3000001 ! beta-lactamase|ARO:3000075 ! class D beta-lactamase|ARO:3000017 ! OXA beta-lactamase
gi|223635895|ARO_3001338|SHV-100__Klebsiella_pneumoniae_	0	0	0	0	0	0	0	0	0	0	0	0	0	0	0	0	0	0	0	0	0	0	0	0	0	0	0	0	0	0	0	0	0	0	0	0	0	0	0	0	0	0	0	0	0	0	0	0	ARO:1000001 ! process or component of antibiotic biology or chemistry|ARO:3000000 ! determinant of antibiotic resistance|ARO:3000129 ! beta-lactam resistance gene|ARO:3000001 ! beta-lactamase|ARO:3000078 ! class A beta-lactamase|ARO:3000096 ! SHV-LEN beta-lactamase|ARO:3000015 ! SHV beta-lactamase
gi|224015932|ARO_3000237|tolC__Escherichia_coli_	0	0	0	0	0	0	0	0	0	0	0	0	0	0	0	0	0	0	0	0	0	0	0	0	0	0	0	0	0	0	0	0	0	0	0	0	0	0	0	0	0	0	0	0	0	0	0	0	ARO:1000001 ! process or component of antibiotic biology or chemistry|ARO:3000000 ! determinant of antibiotic resistance|ARO:3000159 ! efflux pump conferring antibiotic resistance|ARO:3000748 ! subunit of efflux pump conferring antibiotic resistance
gi|224815203|ARO_3000309|emrD__Klebsiella_pneumoniae_	0	0	0	0	0	0	0	0	0	0	0	0	0	0	0	0	0	0	0	0	0	0	0	0	0	0	0	0	0	0	0	0	0	0	0	0	0	0	0	0	0	0	0	0	0	0	0	0	ARO:1000001 ! process or component of antibiotic biology or chemistry|ARO:3000000 ! determinant of antibiotic resistance|ARO:3000159 ! efflux pump conferring antibiotic resistance|ARO:0010002 ! major facilitator superfamily (MFS) antibiotic efflux pump
gi|225184717|ARO_3003059|tmrB__Bacillus_subtilis_subsp__subtilis_str__168_	0	0	0	0	0	0	0	0	0	0	0	0	0	0	0	0	0	0	0	0	0	0	0	0	0	0	0	0	0	0	0	0	0	0	0	0	0	0	0	0	0	0	0	0	0	0	0	0	ARO:1000001 ! process or component of antibiotic biology or chemistry|ARO:3000000 ! determinant of antibiotic resistance|ARO:3003058 ! tunicamycin resistance gene
gi|225184821|ARO_3000863|mprF__Bacillus_subtilis_subsp__subtilis_str__168_	0	0	0	0	0	0	0	0	0	0	0	0	0	0	0	0	0	0	0	0	0	0	0	0	0	0	0	0	0	0	0	0	0	0	0	0	0	0	0	0	0	0	0	0	0	0	0	0	ARO:1000001 ! process or component of antibiotic biology or chemistry|ARO:3000000 ! determinant of antibiotic resistance|ARO:3000751 ! peptide antibiotic resistance gene
gi|225861764|ARO_3000616|mel__Streptococcus_pneumoniae_Taiwan19F-14_	0	0	0	0	0	0	0	0	0	0	0	0	14.3383	0	0	0	0	0	0	0	0	0	0	0	0	0	0	0	0	0	0	0	0	0	0	0	0	0	12.7888	0	0	0	0	0	0	0	0	0	ARO:1000001 ! process or component of antibiotic biology or chemistry|ARO:3000000 ! determinant of antibiotic resistance|ARO:3000240 ! streptogramin resistance gene|ARO:3000131 ! streptogramin resistance efflux pump
gi|226314089|ARO_3002815|clbB__Brevibacillus_brevis_NBRC_100599_	0	0	0	0	0	0	0	0	0	0	0	0	0	0	0	0	0	0	0	0	0	0	0	0	0	0	0	0	0	0	0	0	0	0	0	0	0	0	0	0	0	0	0	0	0	0	0	0	ARO:1000001 ! process or component of antibiotic biology or chemistry|ARO:3000000 ! determinant of antibiotic resistance|ARO:3000052 ! phenicol resistance gene|ARO:3000202 ! Cfr 23S ribosomal RNA methyltransferase
gi|22775587|ARO_3003551|emeA__Enterococcus_faecalis_ATCC_29212_	0	0	0	0	0	0	0	0	0	0	0	0	0	0	0	0	0	0	0	0	0	0	0	0	0	0	0	0	0	0	0	0	0	0	0	0	0	0	0	0	0	0	0	0	0	0	0	0	ARO:1000001 ! process or component of antibiotic biology or chemistry|ARO:3000000 ! determinant of antibiotic resistance|ARO:3000159 ! efflux pump conferring antibiotic resistance|ARO:3000112 ! multidrug and toxic compound extrusion (MATE) transporter
gi|228687116|ARO_3003072|Bacillus_intrinsic_mph__Bacillus_cereus_Rock3-29_	0	0	0	0	0	0	0	0	0	0	0	0	0	0	0	0	0	0	0	0	0	0	0	0	0	0	0	0	0	0	0	0	0	0	0	0	0	0	0	0	0	0	0	0	0	0	0	0	ARO:1000001 ! process or component of antibiotic biology or chemistry|ARO:3000000 ! determinant of antibiotic resistance|ARO:3000557 ! antibiotic inactivation enzyme|ARO:3000201 ! macrolide inactivation enzyme|ARO:3000333 ! macrolide phosphotransferase (MPH)
gi|2292739|ARO_3003095|imiS__Aeromonas_veronii_	0	0	0	0	0	0	0	0	0	0	0	0	0	0	0	0	0	0	0	0	0	0	0	0	0	0	0	0	0	0	0	0	0	0	0	0	0	0	0	0	0	0	0	0	0	0	0	0	ARO:1000001 ! process or component of antibiotic biology or chemistry|ARO:3000000 ! determinant of antibiotic resistance|ARO:3000129 ! beta-lactam resistance gene|ARO:3000001 ! beta-lactamase|ARO:3000004 ! class B (metallo-) beta-lactamase|ARO:3000570 ! subclass B2 (metallo-) beta-lactamase|ARO:3000581 ! CphA beta-lactamase
gi|2292925|ARO_3000343|tap__Mycobacterium_fortuitum_	0	0	0	0	0	0	0	0	0	0	0	0	0	0	0	0	0	0	0	0	0	0	0	0	0	0	0	0	0	0	0	0	0	0	0	0	0	0	0	0	0	0	0	0	0	0	0	0	ARO:1000001 ! process or component of antibiotic biology or chemistry|ARO:3000000 ! determinant of antibiotic resistance|ARO:3000159 ! efflux pump conferring antibiotic resistance|ARO:0010002 ! major facilitator superfamily (MFS) antibiotic efflux pump
gi|229597532|ARO_3002507|PDC-8__Pseudomonas_aeruginosa_	0	0	0	0	0	0	0	0	0	0	0	0	0	0	0	0	0	0	0	0	0	0	0	0	0	0	0	0	0	0	0	0	0	0	0	0	0	0	0	0	0	0	0	0	0	0	0	0	ARO:1000001 ! process or component of antibiotic biology or chemistry|ARO:3000000 ! determinant of antibiotic resistance|ARO:3000129 ! beta-lactam resistance gene|ARO:3000001 ! beta-lactamase|ARO:3000076 ! class C beta-lactamase|ARO:3000098 ! PDC beta-lactamase
gi|23345285|ARO_3002871|tet37__uncultured_bacterium_	0	0	0	0	0	0	0	0	0	0	0	0	0	0	0	0	0	0	0	0	0	0	0	0	0	0	0	0	0	0	0	0	0	0	0	0	0	0	0	0	0	0	0	0	0	0	0	0	ARO:1000001 ! process or component of antibiotic biology or chemistry|ARO:3000000 ! determinant of antibiotic resistance|ARO:3000557 ! antibiotic inactivation enzyme|ARO:3000036 ! tetracycline inactivation enzyme
gi|23451048|ARO_3000842|EBR-1_beta-lactamase__Empedobacter_brevis_	0	0	0	0	0	0	0	0	0	0	0	0	0	0	0	0	0	0	0	0	0	0	0	0	0	0	0	0	0	0	0	0	0	0	0	0	0	0	0	0	0	0	0	0	0	0	0	0	ARO:1000001 ! process or component of antibiotic biology or chemistry|ARO:3000000 ! determinant of antibiotic resistance|ARO:3000129 ! beta-lactam resistance gene|ARO:3000001 ! beta-lactamase|ARO:3000004 ! class B (metallo-) beta-lactamase|ARO:3000568 ! subclass B1 (metallo-) beta-lactamase
gi|23574689|ARO_3000859|rmtA__Pseudomonas_aeruginosa_	0	0	0	0	0	0	0	0	0	0	0	0	0	0	0	0	0	0	0	0	0	0	0	0	0	0	0	0	0	0	0	0	0	0	0	0	0	0	0	0	0	0	0	0	0	0	0	0	ARO:1000001 ! process or component of antibiotic biology or chemistry|ARO:3000000 ! determinant of antibiotic resistance|ARO:3000519 ! antibiotic target modifying enzyme|ARO:3000164 ! rRNA methyltransferase conferring antibiotic resistance|ARO:3000857 ! 16S ribosomal RNA methyltransferase
gi|238773821|ARO_3002574|AAC(6_)-Iaf__Pseudomonas_aeruginosa_	0	0	0	0	0	0	0	0	0	0	0	0	0	0	0	0	0	0	0	0	0	0	0	0	0	0	0	0	0	0	0	0	0	0	0	0	0	0	0	0	0	0	0	0	0	0	0	0	ARO:1000001 ! process or component of antibiotic biology or chemistry|ARO:3000000 ! determinant of antibiotic resistance|ARO:3000104 ! aminoglycoside resistance gene|ARO:3000121 ! aminoglycoside acetyltransferase (AAC)|ARO:3000345 ! AAC(6')
gi|238820137|ARO_3003022|dfrB3__Klebsiella_oxytoca_	0	0	0	0	0	0	0	0	0	0	0	0	0	0	0	0	0	0	0	0	0	0	0	0	0	0	0	0	0	0	0	0	0	0	0	0	0	0	0	0	0	0	0	0	0	0	0	0	ARO:1000001 ! process or component of antibiotic biology or chemistry|ARO:3000000 ! determinant of antibiotic resistance|ARO:3001217 ! trimethoprim resistance gene|ARO:3001218 ! trimethoprim resistant dihydrofolate reductase dfr
gi|239796048|ARO_3000198|FosX__Desulfovibrio_magneticus_RS-1_	0	0	2.50606	0	0	0	0	0	0	0	0.931781	0	0	0	0	0	0	0	0	2.13981	1.14862	0	0	0	0	0	0	0	1.57519	0	0.958458	1.23993	1.40293	0	0	3.16344	0	2.6055	1.66255	0	0	0	0	0	0	0	2.1353	0	ARO:1000001 ! process or component of antibiotic biology or chemistry|ARO:3000000 ! determinant of antibiotic resistance|ARO:3000271 ! fosfomycin resistance gene|ARO:3000342 ! fosfomycin inactivation enzyme|ARO:3000133 ! fosfomycin thiol transferase
gi|239925271|ARO_3002320|KPC-10__Acinetobacter_baumannii_	0	0	0	0	0	0	0	0	0	0	0	0	0	0	0	0	0.770792	0	0	0	0	0	0	0	0	0	0	0	0	0	0	0.619964	0	0	0	0	0	0	0	0	0	0	0	0	0	0	0	0	ARO:1000001 ! process or component of antibiotic biology or chemistry|ARO:3000000 ! determinant of antibiotic resistance|ARO:3000129 ! beta-lactam resistance gene|ARO:3000001 ! beta-lactamase|ARO:3000078 ! class A beta-lactamase|ARO:3000059 ! KPC beta-lactamase
gi|240129546|ARO_3002188|MOX-5__Aeromonas_caviae_	0	0	0	0	0	0	0	0	0	0	0	0	0	0	0	0	0	0	0	0	0	0	0	0	0	0	0	0	0	0	0	0	0	0	0	0	0	0	0	0	0	0	0	0	0	0	0	0	ARO:1000001 ! process or component of antibiotic biology or chemistry|ARO:3000000 ! determinant of antibiotic resistance|ARO:3000129 ! beta-lactam resistance gene|ARO:3000001 ! beta-lactamase|ARO:3000076 ! class C beta-lactamase|ARO:3000085 ! CMY-LAT-MOX beta-lactamase|ARO:3000087 ! CMY-MOX beta-lactamase|ARO:3000083 ! MOX beta-lactamase
gi|24209733|ARO_3002864|dfrB1__uncultured_bacterium_	0	0	0	0	0	0	0	0	0	0	0	0	0	0	0	0	0	0	0	0	0	0	0	0	0	0	0	0	0	0	0	0	0	0	0	0	0	0	0	0	0	0	0	0	0	0	0	0	ARO:1000001 ! process or component of antibiotic biology or chemistry|ARO:3000000 ! determinant of antibiotic resistance|ARO:3001217 ! trimethoprim resistance gene|ARO:3001218 ! trimethoprim resistant dihydrofolate reductase dfr
gi|242129310|ARO_3000573|tet43__uncultured_bacterium_AOTet43_	0	0	0	0	0	0	0	0	0	0	0	0	0	0	0	0	0	0	0	0	0	0	0	0	0	0	0	0	0	0	0	0	0	0	0	0	0	0	0	0	0	0	0	0	0	0	0	0	ARO:1000001 ! process or component of antibiotic biology or chemistry|ARO:3000000 ! determinant of antibiotic resistance|ARO:3000159 ! efflux pump conferring antibiotic resistance|ARO:0010002 ! major facilitator superfamily (MFS) antibiotic efflux pump
gi|244649|ARO_3002651|APH(3_)-Vc__Micromonospora_chalcea_	0	0	0	0	0	0	0	0	0	0	0	0	0	0	0	0	0	0	0	0	0	0	0	0	0	0	0	0	0	0	0	0	0	0	0	0	0	0	0	0	0	0	0	0	0	0	0	0	ARO:1000001 ! process or component of antibiotic biology or chemistry|ARO:3000000 ! determinant of antibiotic resistance|ARO:3000557 ! antibiotic inactivation enzyme|ARO:3000114 ! aminoglycoside phosphotransferase (APH)|ARO:3000126 ! APH(3')
gi|24637303|ARO_3000843|MUS-1_beta-lactamase__Myroides_odoratimimus_	0	0	0	0	0	0	0	0	0	0	0	0	0	0	0	0	0	0	0	0	0	0	0	0	0	0	0	0	0	0	0	0	0	0	0	0	0	0	0	0	0	0	0	0	0	0	0	0	ARO:1000001 ! process or component of antibiotic biology or chemistry|ARO:3000000 ! determinant of antibiotic resistance|ARO:3000129 ! beta-lactam resistance gene|ARO:3000001 ! beta-lactamase|ARO:3000004 ! class B (metallo-) beta-lactamase|ARO:3000568 ! subclass B1 (metallo-) beta-lactamase
gi|24637305|ARO_3000844|TUS-1_beta-lactamase__Myroides_odoratus_DSM_2801_	0	0	0	0	0	0	0	0	0	0	0	0	0	0	0	0	0	0	0	0	0	0	0	0	0	0	0	0	0	0	0	0	0	0	0	0	0	0	0	0	0	0	0	0	0	0	0	0	ARO:1000001 ! process or component of antibiotic biology or chemistry|ARO:3000000 ! determinant of antibiotic resistance|ARO:3000129 ! beta-lactam resistance gene|ARO:3000001 ! beta-lactamase|ARO:3000004 ! class B (metallo-) beta-lactamase|ARO:3000568 ! subclass B1 (metallo-) beta-lactamase
gi|25044851|ARO_3002604|aadA4__Acinetobacter_baumannii_	0	0	0	0	0	0	0	0	0	0	0	0	0	0	0	0	0	0	0	0	0	0	0	0	0	0	0	0	0	0	0	0	0	0	0	0	0	0	0	0	0	0	0	0	0	0	0	0	ARO:1000001 ! process or component of antibiotic biology or chemistry|ARO:3000000 ! determinant of antibiotic resistance|ARO:3000104 ! aminoglycoside resistance gene|ARO:3000218 ! aminoglycoside nucleotidyltransferase (ANT)|ARO:3000232 ! ANT(3'')-Ia
gi|25278056|ARO_3002203|IMP-12__Pseudomonas_putida_	0	0	0	0	0	0	0	0	0	0	0	0	0	0	0	0	0	0	0	0	0	0	0	0	0	0	0	0	0	0	0	0	0	0	0	0	0	0	0	0	0	0	0	0	0	0	2.1353	0	ARO:1000001 ! process or component of antibiotic biology or chemistry|ARO:3000000 ! determinant of antibiotic resistance|ARO:3000129 ! beta-lactam resistance gene|ARO:3000001 ! beta-lactamase|ARO:3000004 ! class B (metallo-) beta-lactamase|ARO:3000568 ! subclass B1 (metallo-) beta-lactamase|ARO:3000020 ! IMP beta-lactamase
gi|254547274|ARO_3000846|SIM-1_beta-lactamase__Acinetobacter_bereziniae_	0	0	0	0	0	0	0	0	0	0	0	0	0	0	0	0	0	0	0	0	0	0	0	0	0	0	0	0	0	0	0	0	0	0	0	0	0	0	0	0	0	0	0	0	0	0	0	0	ARO:1000001 ! process or component of antibiotic biology or chemistry|ARO:3000000 ! determinant of antibiotic resistance|ARO:3000129 ! beta-lactam resistance gene|ARO:3000001 ! beta-lactamase|ARO:3000004 ! class B (metallo-) beta-lactamase|ARO:3000568 ! subclass B1 (metallo-) beta-lactamase
gi|254966746|ARO_3003097|CfxA6__uncultured_organism_	0	0	0	0	0	0	0	0	0	0	0.465891	0	0	0	0	0	0	0	0	0	0	0	0	0	0	0	0	0	0	0	0	0	0	0	0	0	0	0	0.602372	0	0	0	0	0	0	0	0	0	ARO:1000001 ! process or component of antibiotic biology or chemistry|ARO:3000000 ! determinant of antibiotic resistance|ARO:3000129 ! beta-lactam resistance gene|ARO:3000001 ! beta-lactamase|ARO:3000078 ! class A beta-lactamase|ARO:3003000 ! CfxA beta-lactamase
gi|254966813|ARO_3002999|CblA-1__mixed_culture_bacterium_AX_gF3SD01_15_	0	0	0	0	0	0	0	0	0	0	0	0	0	0	0	0	0	0	0	0	0	0	0	0	0	0	0	0	0	0	0	0	0	0	0	0	0	0	0	0	0	0	0	0	0	0	0	0	ARO:1000001 ! process or component of antibiotic biology or chemistry|ARO:3000000 ! determinant of antibiotic resistance|ARO:3000129 ! beta-lactam resistance gene|ARO:3000001 ! beta-lactamase|ARO:3000078 ! class A beta-lactamase|ARO:3002998 ! CblA beta-lactamase
gi|257403|ARO_3002670|cat__Vibrio_anguillarum_	0	0	0	0	0	0	0	0	0	0	0	0	0	0	0	0	0	0	0	0	0	0	0	0	0	0	0	0	0	0	0	0	0	0	0	0	0	0	0	0	0	0	0	0	0	0	0	0	ARO:1000001 ! process or component of antibiotic biology or chemistry|ARO:3000000 ! determinant of antibiotic resistance|ARO:3000557 ! antibiotic inactivation enzyme|ARO:3000122 ! chloramphenicol acetyltransferase (CAT)
gi|2575872|ARO_3002493|SRT-1__Serratia_marcescens_	0	0	0	0	0	0	0	0	0	0	0	0	7.23704	0	0	0	0	0	0	0	0	0	0	0	0	0	0	0	0	0	0	0	0	0	32.3329	0	0	0	0	0	0	0	0	0	0	0	0	0	ARO:1000001 ! process or component of antibiotic biology or chemistry|ARO:3000000 ! determinant of antibiotic resistance|ARO:3000129 ! beta-lactam resistance gene|ARO:3000001 ! beta-lactamase|ARO:3000076 ! class C beta-lactamase|ARO:3000095 ! SRT beta-lactamase
gi|260217226|ARO_3000149|FosA__Cronobacter_turicensis_z3032_	0	0	0	0	0	0	0	0	0	0	0	0	0	0	0	0	0	0	0	0	0	0	0	0	0	0	0	0	0	0	0	0	0	0	0	0	0	0	0	0	0	0	0	0	0	0	0	0	ARO:1000001 ! process or component of antibiotic biology or chemistry|ARO:3000000 ! determinant of antibiotic resistance|ARO:3000271 ! fosfomycin resistance gene|ARO:3000342 ! fosfomycin inactivation enzyme|ARO:3000133 ! fosfomycin thiol transferase
gi|2613096|ARO_3000181|tetV__Mycobacterium_smegmatis_str__MC2_155_	0	0	0	0	0	0	0	0	0	0	0	0	0	0	0	0	0	0	0	0	0	0	0	0	0	0	0	0	0	0	0	0	0	0	0	0	0	0	0	0	0	0	0	0	0	0	0	0	ARO:1000001 ! process or component of antibiotic biology or chemistry|ARO:3000000 ! determinant of antibiotic resistance|ARO:3000159 ! efflux pump conferring antibiotic resistance|ARO:0010002 ! major facilitator superfamily (MFS) antibiotic efflux pump
gi|261348124|ARO_3001654|OXA-143__Acinetobacter_baumannii_	0	0	0	0	0	0	0	0	0	0	0	0	0	0	0	0	0	0	0	0	0	0	0	0	0	0	0	0	0	0	0	0	0	0	0	0	0	0	0	0	0	0	0	0	0	0	0	0	ARO:1000001 ! process or component of antibiotic biology or chemistry|ARO:3000000 ! determinant of antibiotic resistance|ARO:3000129 ! beta-lactam resistance gene|ARO:3000001 ! beta-lactamase|ARO:3000075 ! class D beta-lactamase|ARO:3000017 ! OXA beta-lactamase
gi|261607834|ARO_3002845|vatH__Enterococcus_faecium_	0	0	0	0	0	0	0	0	0	0	0	0	0	0	0	0	0	0	0	0	0	0	0	0	0	0	0	0	0	0	0	0	0	0	0	0	0	0	0	0	0	0	0	0	0	0	0	0	ARO:1000001 ! process or component of antibiotic biology or chemistry|ARO:3000000 ! determinant of antibiotic resistance|ARO:3000240 ! streptogramin resistance gene|ARO:3000233 ! streptogramin inactivation enzyme|ARO:3000453 ! vat acetyltransferase
gi|262225770|ARO_3000178|tetK__Staphylococcus_aureus_subsp__aureus_ED98_	1.30343	0	0	0	0	0	0	1.40682	0	0	1.10926	0	0	0	0	0	0	0	0	0	0	0	0	0	0	0	0	0	0	0	3.22462	0	0	0	0	0	0	0	1.35247	0	0	0	0	0	0	0	0	0	ARO:1000001 ! process or component of antibiotic biology or chemistry|ARO:3000000 ! determinant of antibiotic resistance|ARO:3000472 ! tetracycline resistance gene|ARO:3000239 ! tetracycline resistance efflux pump
gi|262340499|ARO_3002832|vgaD__Enterococcus_faecium_	0	0	0	0	0	0	0	0	0	0	0	0	0	0	0	0	0	0	0	0	0	0	0	0	0	0	0	0	0	0	0	0	0	0	0	0	0	0	0	0	0	0	0	0	0	0	0	0	ARO:1000001 ! process or component of antibiotic biology or chemistry|ARO:3000000 ! determinant of antibiotic resistance|ARO:3000240 ! streptogramin resistance gene|ARO:3000131 ! streptogramin resistance efflux pump|ARO:3000113 ! vga
gi|2633663|ARO_3003063|ykkC__Bacillus_subtilis_subsp__subtilis_str__168_	0	0	0	0	0	0	0	0	0	0	0	0	0	0	0	0	0	0	0	0	0	0	0	0	0	0	0	0	0	0	0	0	0	0	0	0	0	0	0	0	0	0	0	0	0	0	0	0	ARO:1000001 ! process or component of antibiotic biology or chemistry|ARO:3000000 ! determinant of antibiotic resistance|ARO:3000159 ! efflux pump conferring antibiotic resistance|ARO:3000748 ! subunit of efflux pump conferring antibiotic resistance
gi|2633664|ARO_3003064|ykkD__Bacillus_subtilis_subsp__subtilis_str__168_	0	0	0	0	0	0	0	0	0	0	0	0	0	0	0	0	0	0	0	0	0	0	0	0	0	0	0	0	0	0	0	0	0	0	0	0	0	0	0	0	0	0	0	0	0	0	0	0	ARO:1000001 ! process or component of antibiotic biology or chemistry|ARO:3000000 ! determinant of antibiotic resistance|ARO:3000159 ! efflux pump conferring antibiotic resistance|ARO:3000748 ! subunit of efflux pump conferring antibiotic resistance
gi|2635124|ARO_3002627|aadK__Bacillus_subtilis_subsp__subtilis_str__168_	0	0	0	0	0	0	0	0	0	0	0	0	0	0	0	0	0	0	0	0	0	0	0	0	0	0	0	0	0	0	0	0	0	0	0	0	0	0	0	0	0	0	0	0	0	0	0	0	ARO:1000001 ! process or component of antibiotic biology or chemistry|ARO:3000000 ! determinant of antibiotic resistance|ARO:3000104 ! aminoglycoside resistance gene|ARO:3000218 ! aminoglycoside nucleotidyltransferase (ANT)|ARO:3000225 ! ANT(6)
gi|269202307|ARO_3000815|mgrA__Staphylococcus_aureus_subsp__aureus_ED98_	0	0	0	0	0	0	1.92524	1.67219	0	0	1.29414	0	0	0	0	0	0	0	0	0	0	0	0	0	0	0	0	0	0	0	0	0	0	0	0	4.16242	0	3.42829	0	0	0	0	0	1.73076	0	0	0	0	ARO:1000001 ! process or component of antibiotic biology or chemistry|ARO:3000000 ! determinant of antibiotic resistance|ARO:3000451 ! gene modulating antibiotic efflux
gi|27315582|ARO_3002865|dfrC__Staphylococcus_epidermidis_ATCC_12228_	0	0	0	0	0	0	0	6.94602	0	0	5.37566	0	0	8.75608	0	0	0	0	0	0	0	0	0	0	0	0	0	0	0	0	0	0	0	0	0	0	0	0	0	16.3898	0	0	0	0	0	0	0	0	ARO:1000001 ! process or component of antibiotic biology or chemistry|ARO:3000000 ! determinant of antibiotic resistance|ARO:3001217 ! trimethoprim resistance gene|ARO:3001218 ! trimethoprim resistant dihydrofolate reductase dfr
gi|27436728|ARO_3000601|Erm(38)__Mycobacterium_smegmatis_	0	0	0	0	0	0	0	0	0	0	0	0	0	0	0	0	0	0	0	0	0	0	0	0	0	0	0	0	0	0	0	0	0	0	0	0	0	0	0	0	0	0	0	0	0	0	0	0	ARO:1000001 ! process or component of antibiotic biology or chemistry|ARO:3000000 ! determinant of antibiotic resistance|ARO:3000315 ! macrolide resistance gene|ARO:3000560 ! Erm 23S ribosomal RNA methyltransferase
gi|27461217|ARO_3000005|vanD__Enterococcus_faecium_	0	0	0	0	0	0	0	0	0	0	0	0	0	0	0	0	0	0	0	0	0	0	0	0	0	0	0	0	0	0	0	0	0	0	0	0	0	0	0	0	0	0	0	0	0	0	0	0	ARO:1000001 ! process or component of antibiotic biology or chemistry|ARO:3000000 ! determinant of antibiotic resistance|ARO:3000012 ! gene conferring antibiotic resistance via molecular bypass|ARO:3002976 ! gene associated with a glycopeptide resistance cluster|ARO:3002906 ! van ligase|ARO:3002978 ! D-Ala-D-Lac ligase
gi|27461218|ARO_3002944|vanHD__Enterococcus_faecium_	0	0	0	0	0	0	0	0	0	0	0	0	0	0	0	0	0	0	0	0	0	0	0	0	0	0	0	0	0	0	0	0	0	0	0	0	0	0	0	0	0	0	0	0	0	0	0	0	ARO:1000001 ! process or component of antibiotic biology or chemistry|ARO:3000000 ! determinant of antibiotic resistance|ARO:3000012 ! gene conferring antibiotic resistance via molecular bypass|ARO:3002976 ! gene associated with a glycopeptide resistance cluster|ARO:3000006 ! vanH
gi|27461219|ARO_3002923|vanRD__Enterococcus_faecium_	0	0	0	0	0	0	0	0	0	0	0	0	0	0	0	0	0	0	0	0	0	0	0	0	0	0	0	0	0	0	0	0	0	0	0	0	0	0	0	0	0	0	0	0	0	0	0	0	ARO:1000001 ! process or component of antibiotic biology or chemistry|ARO:3000000 ! determinant of antibiotic resistance|ARO:3000012 ! gene conferring antibiotic resistance via molecular bypass|ARO:3002976 ! gene associated with a glycopeptide resistance cluster|ARO:3002905 ! VanS-VanR two-component regulatory system|ARO:3000574 ! vanR
gi|27461220|ARO_3003070|vanXD__Enterococcus_faecium_	0	0	0	0	0	0	0	0	0	0	0	0	0	0	0	0	0	0	0	0	0	0	0	0	0	0	0	0	0	0	0	0	0	0	0	0	0	0	0	0	0	0	0	0	0	0	0	0	ARO:1000001 ! process or component of antibiotic biology or chemistry|ARO:3000000 ! determinant of antibiotic resistance|ARO:3000012 ! gene conferring antibiotic resistance via molecular bypass|ARO:3002976 ! gene associated with a glycopeptide resistance cluster|ARO:3000011 ! vanX
gi|27461221|ARO_3002957|vanYD__Enterococcus_faecium_	0	0	0	0	0	0	0	0	0	0	0	0	0	0	0	0	0	0	0	0	0	0	0	0	0	0	0	0	0	0	0	0	0	0	0	0	0	0	0	0	0	0	0	0	0	0	0	0	ARO:1000001 ! process or component of antibiotic biology or chemistry|ARO:3000000 ! determinant of antibiotic resistance|ARO:3000012 ! gene conferring antibiotic resistance via molecular bypass|ARO:3002976 ! gene associated with a glycopeptide resistance cluster|ARO:3000077 ! vanY
gi|27543326|ARO_3000167|tetC__uncultured_bacterium_	0	0	0	0	0	0	0	0	0	0	0	0	0	0	0	0	0	0	0	0	0	0	0	0	0	0	0	0	0	0	0	0	0	0	0	0	0	0	0	0	0	0	0	0	0	0	0	0	ARO:1000001 ! process or component of antibiotic biology or chemistry|ARO:3000000 ! determinant of antibiotic resistance|ARO:3000472 ! tetracycline resistance gene|ARO:3000239 ! tetracycline resistance efflux pump
gi|2769708|ARO_3000118|vgaB__Staphylococcus_aureus_	0	0	0	0	0	0	0	0	0	0	0	0	0	0	0	0	0	0	0	0	0	0	0	0	0	0	0	0	0	0	0	0	0	0	0	0	0	0	0	0	0	0	0	0	0	0	0	0	ARO:1000001 ! process or component of antibiotic biology or chemistry|ARO:3000000 ! determinant of antibiotic resistance|ARO:3000240 ! streptogramin resistance gene|ARO:3000131 ! streptogramin resistance efflux pump|ARO:3000113 ! vga
gi|286054|ARO_3001306|ErmW__Micromonospora_griseorubida_	0	0	0	0	0	0	0	0	0	0	0	0	0	0	0	0	0	0	0	0	0	0	0	0	0	0	0	0	0	0	0	0	0	0	0	0	0	0	0	0	0	0	0	0	0	0	0	0	ARO:1000001 ! process or component of antibiotic biology or chemistry|ARO:3000000 ! determinant of antibiotic resistance|ARO:3000315 ! macrolide resistance gene|ARO:3000560 ! Erm 23S ribosomal RNA methyltransferase
gi|289918857|ARO_3000861|rmtC__Salmonella_enterica_subsp__enterica_serovar_Virchow_	0	0	0	0	0	0	0	0	0	0	0	0	0	0	0	0	0	0	0	0	0	0	0	0	0	0	0	0	0	0	0	0	0	0	0	0	0	0	0	0	0	0	0	0	0	0	0	0	ARO:1000001 ! process or component of antibiotic biology or chemistry|ARO:3000000 ! determinant of antibiotic resistance|ARO:3000519 ! antibiotic target modifying enzyme|ARO:3000164 ! rRNA methyltransferase conferring antibiotic resistance|ARO:3000857 ! 16S ribosomal RNA methyltransferase
gi|290472|ARO_3000173|tetE__Escherichia_coli_	0	0	0	0	0	0	0	0	0	0	0	0	0	0	0	0	0	0	0	0	0	0	0	0	0	0	0	0	0	0	0	0	0	0	0	0	0	0	0	0	0	0	0	0	0	0	0	0	ARO:1000001 ! process or component of antibiotic biology or chemistry|ARO:3000000 ! determinant of antibiotic resistance|ARO:3000159 ! efflux pump conferring antibiotic resistance|ARO:0010002 ! major facilitator superfamily (MFS) antibiotic efflux pump
gi|2909805|ARO_3002561|AAC(6_)-Ir__Acinetobacter_genomosp__14_	0	0	0	0	0	0	0	0	0	0	0	0	0	0	0	0	0	0	0	0	0	0	0	0	0	0	0	0	0	0	0	0	0	0	0	0	0	0	0	0	0	0	0	0	0	0	0	0	ARO:1000001 ! process or component of antibiotic biology or chemistry|ARO:3000000 ! determinant of antibiotic resistance|ARO:3000104 ! aminoglycoside resistance gene|ARO:3000121 ! aminoglycoside acetyltransferase (AAC)|ARO:3000345 ! AAC(6')
gi|2909811|ARO_3002565|AAC(6_)-Iu__Acinetobacter_genomosp__17BJ_	0	0	0	0	0	0	0	0	0	0	0	0	0	0	0	0	0	0	0	0	0	0	0	0	0	0	0	0	0	0	0	0	0	0	0	0	0	0	0	0	0	0	0	0	0	0	0	0	ARO:1000001 ! process or component of antibiotic biology or chemistry|ARO:3000000 ! determinant of antibiotic resistance|ARO:3000104 ! aminoglycoside resistance gene|ARO:3000121 ! aminoglycoside acetyltransferase (AAC)|ARO:3000345 ! AAC(6')
gi|2909813|ARO_3002566|AAC(6_)-Iv__Acinetobacter_sp__631_	0	0	0	0	0	0	0	0	0	0	0	0	0	0	0	0	0	0	0	0	0	0	0	0	0	0	0	0	0	0	0	0	0	0	0	0	0	0	0	0	0	0	0	0	0	0	0	0	ARO:1000001 ! process or component of antibiotic biology or chemistry|ARO:3000000 ! determinant of antibiotic resistance|ARO:3000104 ! aminoglycoside resistance gene|ARO:3000121 ! aminoglycoside acetyltransferase (AAC)|ARO:3000345 ! AAC(6')
gi|291461505|ARO_3003440|mecB__Macrococcus_caseolyticus_	0	0	0	0	0	0	0	0	0	0	0	0	0	0	0	0	0	0	0	0	0	0	0	0	0	0	0	0	0	0	0	0	0	0	0	0	0	0	0	0	0	0	0	0	0	0	0	0	ARO:1000001 ! process or component of antibiotic biology or chemistry|ARO:3000000 ! determinant of antibiotic resistance|ARO:3000381 ! antibiotic target replacement protein|ARO:3003040 ! beta-lactam resistant penicillin-binding proteins|ARO:3001208 ! methicillin resistant PBP2
gi|29344260|ARO_3002916|vanV__Enterococcus_faecalis_V583_	0	0	0	0	0	0	0	0	0	0	0	0	0	0	0	0	0	0	0	0	0	0	0	0	0	0	0	0	0	0	0	0	0	0	0	0	0	0	0	0	0	0	0	0	0	0	0	0	ARO:1000001 ! process or component of antibiotic biology or chemistry|ARO:3000000 ! determinant of antibiotic resistance|ARO:3000012 ! gene conferring antibiotic resistance via molecular bypass|ARO:3002976 ! gene associated with a glycopeptide resistance cluster
gi|29378569|ARO_3002623|ANT(4_)-Ia__Bacillus_clausii_	0	0	0	0	0	0	0	0	0	0	0	0	0	0	0	0	0	0	0	0	0	0	0	0	0	0	0	0	0	0	0	0	0	0	0	0	0	0	0	0	0	0	0	0	0	0	0	0	ARO:1000001 ! process or component of antibiotic biology or chemistry|ARO:3000000 ! determinant of antibiotic resistance|ARO:3000104 ! aminoglycoside resistance gene|ARO:3000218 ! aminoglycoside nucleotidyltransferase (ANT)|ARO:3000229 ! ANT(4')
gi|29467397|ARO_3000166|tetB__Gram-negative_bacterium_TC71_	0	0	0	0	0	0	0	0	0	0	0	0	0	0	0	0	0	0	0	0	0	0	0	0	0	0	0	0	0	0	0	0	0	0	0	0	0	0	0	0	0	0	0	0	0	0	0	0	ARO:1000001 ! process or component of antibiotic biology or chemistry|ARO:3000000 ! determinant of antibiotic resistance|ARO:3000159 ! efflux pump conferring antibiotic resistance|ARO:0010002 ! major facilitator superfamily (MFS) antibiotic efflux pump
gi|294757|ARO_3002642|APH(3_)-Ib__Plasmid_RP4_	0	0	0	0	0	0	0	0	0	0	0	0	0	0	0	0	0	0	0	0	0	0	0	0	0	0	0	0	0	0	0	0	0	0	0	0	0	0	0	0	0	0	0	0	0	0	0	0	ARO:1000001 ! process or component of antibiotic biology or chemistry|ARO:3000000 ! determinant of antibiotic resistance|ARO:3000557 ! antibiotic inactivation enzyme|ARO:3000114 ! aminoglycoside phosphotransferase (APH)|ARO:3000126 ! APH(3')
gi|294997089|ARO_3002263|IND-7__Chryseobacterium_indologenes_	0	0	0	0	0	0	0	0	0	0	0	0	0	0	0	0	0	0	0	0	0	0	0	0	0	0	0	0	0	0	0	0	0	0	0	0	0	0	0	0	0	0	0	0	0	0	0	0	ARO:1000001 ! process or component of antibiotic biology or chemistry|ARO:3000000 ! determinant of antibiotic resistance|ARO:3000129 ! beta-lactam resistance gene|ARO:3000001 ! beta-lactamase|ARO:3000004 ! class B (metallo-) beta-lactamase|ARO:3000568 ! subclass B1 (metallo-) beta-lactamase|ARO:3000060 ! IND beta-lactamase
gi|295164|ARO_3002542|AAC(3)-VIIIa__Streptomyces_fradiae_	0	1.07798	8.77119	0	4.84327	0	9.70322	2.40795	1.81827	3.38881	0	0	0	0.75886	0	0	0.770792	6.16957	4.02107	2.13981	4.59449	0	0	2.32019	4.40776	1.02593	4.84283	4.26676	3.15039	0	1.91692	1.23993	4.20878	0	0	0	2.91558	2.6055	5.54182	0	0	0	4.75872	0	0	2.52318	0	6.86523	ARO:1000001 ! process or component of antibiotic biology or chemistry|ARO:3000000 ! determinant of antibiotic resistance|ARO:3000104 ! aminoglycoside resistance gene|ARO:3000121 ! aminoglycoside acetyltransferase (AAC)|ARO:3000322 ! AAC(3)
gi|295979338|ARO_3002799|QnrVC1__Vibrio_cholerae_	0	0	0	0	0	0	0	0	0	0	0	0	0	0	0	0	0	0	0	0	0	0	0	0	0	0	0	0	0	0	0	0	0	0	0	0	0	0	0	0	0	0	0	0	0	0	0	0	ARO:1000001 ! process or component of antibiotic biology or chemistry|ARO:3000000 ! determinant of antibiotic resistance|ARO:3000102 ! fluoroquinolone resistance gene|ARO:3000419 ! fluoroquinolone resistance protein
gi|2967656|ARO_3002846|arr-1__Mycobacterium_smegmatis_	0	0	0	0	0	0	0	0	0	0	0	0	0	0	0	0	0	0	0	0	0	0	0	0	0	0	0	0	0	0	0	0	0	0	0	0	0	0	0	0	0	0	0	0	0	0	0	0	ARO:1000001 ! process or component of antibiotic biology or chemistry|ARO:3000000 ! determinant of antibiotic resistance|ARO:3000383 ! rifampin resistance gene|ARO:3000576 ! rifampin inactivation enzyme|ARO:3000390 ! rifampin ADP-ribosyltransferase (Arr)
gi|298103888|ARO_3003046|qacA__Staphylococcus_aureus_	0	0	0	0	0	2.52641	0	2.57995	0	0	7.76484	0	0	0	0	0	0	0	0	0	0	0	0	0	0	0	0	0	0	0	4.79229	0	0	0	0	3.9543	1.61977	0	6.39441	0	0	0	0	1.73076	0	0	0	0	ARO:1000001 ! process or component of antibiotic biology or chemistry|ARO:3000000 ! determinant of antibiotic resistance|ARO:3000159 ! efflux pump conferring antibiotic resistance|ARO:3000748 ! subunit of efflux pump conferring antibiotic resistance
gi|298104546|ARO_3002801|QnrVC4__Aeromonas_caviae_	0	0	0	0	0	0	0	0	0	0	0	0	0	0	0	0	0	0	0	0	0	0	0	0	0	0	0	0	0	0	0	0	0	0	0	0	0	0	0	0	0	0	0	0	0	0	0	0	ARO:1000001 ! process or component of antibiotic biology or chemistry|ARO:3000000 ! determinant of antibiotic resistance|ARO:3000102 ! fluoroquinolone resistance gene|ARO:3000419 ! fluoroquinolone resistance protein
gi|2992469|ARO_3002481|AER-1__Aeromonas_hydrophila_	0	0	0	0	0	0	0	0	0	0	0	0	0	0	0	0	0	0	0	0	0	0	0	0	0	0	0	0	0	0	0	0	0	0	0	0	0	0	0	0	0	0	0	0	0	0	0	0	ARO:1000001 ! process or component of antibiotic biology or chemistry|ARO:3000000 ! determinant of antibiotic resistance|ARO:3000129 ! beta-lactam resistance gene|ARO:3000001 ! beta-lactamase|ARO:3000078 ! class A beta-lactamase|ARO:3000089 ! AER beta-lactamase
gi|299469423|ARO_3000556|tet44__Campylobacter_fetus_subsp__fetus_	0	0	0	0	0	0	0	0	0	0	0	0	0	0	0	0	0	0	0	0	0	0	0	0	0	0	0	0	0	0	0	0	0	0	0	0	0	0	0	0	0	0	0	0	0	0	0	0	ARO:1000001 ! process or component of antibiotic biology or chemistry|ARO:3000000 ! determinant of antibiotic resistance|ARO:3000185 ! antibiotic target protection protein|ARO:0000002 ! tetracycline resistance ribosomal protection protein
gi|299469424|ARO_3002629|ANT(6)-Ib__Campylobacter_fetus_subsp__fetus_	0	0	0	0	0	0	0	0	0	0	0	0	0	0	0	0	0	0	0	0	0	0	0	0	0	0	0	0	0	0	0	0	0	0	0	0	0	0	0	0	0	0	0	0	0	0	0	0	ARO:1000001 ! process or component of antibiotic biology or chemistry|ARO:3000000 ! determinant of antibiotic resistance|ARO:3000104 ! aminoglycoside resistance gene|ARO:3000218 ! aminoglycoside nucleotidyltransferase (ANT)|ARO:3000225 ! ANT(6)
gi|299782349|ARO_3002874|FosC2__Escherichia_coli_	0	0	0	0	0	0	0	0	0	0	0	0	0	0	0	0	0	0	0	0	0	0	0	0	0	0	0	0	0	0	0	0	0	0	0	0	0	0	0	0	0	0	0	0	0	0	0	0	ARO:1000001 ! process or component of antibiotic biology or chemistry|ARO:3000000 ! determinant of antibiotic resistance|ARO:3000271 ! fosfomycin resistance gene|ARO:3000342 ! fosfomycin inactivation enzyme|ARO:3000359 ! fosfomycin phosphotransferase
gi|300078713|ARO_3000863|mprF__Staphylococcus_aureus_	0	0	0	0	0	0	0	0	0	0	0	0	0	0	0	0	0	0	0	0	0	0	0	0	0	0	0	0	0	0	0	0	0	0	0	0	0	0	0	0	0	0	0	0	0	0	0	0	ARO:1000001 ! process or component of antibiotic biology or chemistry|ARO:3000000 ! determinant of antibiotic resistance|ARO:3000751 ! peptide antibiotic resistance gene
gi|30014072|ARO_3002277|VIM-7__Pseudomonas_aeruginosa_	0	0	0	0	0	0	0	0	0	0	0	0	0	0	0	0	0	0	0	0	0	0	0	0	0	0	0	0	0	0	0	0	0	0	0	0	0	0	0	0	0	0	0	0	0	0	0	0	ARO:1000001 ! process or component of antibiotic biology or chemistry|ARO:3000000 ! determinant of antibiotic resistance|ARO:3000129 ! beta-lactam resistance gene|ARO:3000001 ! beta-lactamase|ARO:3000004 ! class B (metallo-) beta-lactamase|ARO:3000568 ! subclass B1 (metallo-) beta-lactamase|ARO:3000021 ! VIM beta-lactamase
gi|300510840|ARO_3002267|IND-11__Chryseobacterium_indologenes_	0	0	0	0	0	0	0	0	0	0	0	0	0	0	0	0	0	0	0	0	0	0	0	0	0	0	0	0	0	0	0	0	0	0	0	0	0	0	0	0	0	0	0	0	0	0	0	0	ARO:1000001 ! process or component of antibiotic biology or chemistry|ARO:3000000 ! determinant of antibiotic resistance|ARO:3000129 ! beta-lactam resistance gene|ARO:3000001 ! beta-lactamase|ARO:3000004 ! class B (metallo-) beta-lactamase|ARO:3000568 ! subclass B1 (metallo-) beta-lactamase|ARO:3000060 ! IND beta-lactamase
gi|300791412|ARO_3001662|OXA-164__Acinetobacter_baumannii_	0	0	0	0	0	0	0	0	0	0	0	0	0	0	0	0	0	0	0	0	0	0	0	0	0	0	0	0	0	0	0	0	0	0	0	0	0	0	0	0	0	0	0	0	0	0	0	0	ARO:1000001 ! process or component of antibiotic biology or chemistry|ARO:3000000 ! determinant of antibiotic resistance|ARO:3000129 ! beta-lactam resistance gene|ARO:3000001 ! beta-lactamase|ARO:3000075 ! class D beta-lactamase|ARO:3000017 ! OXA beta-lactamase
gi|30141367|ARO_3002531|AAC(3)-Ic__Pseudomonas_aeruginosa_	0	0	0	0	0	0	0	0	0	0	0	0	0	0	0	0	0	0	0	0	0	0	0	0	0	0	0	0	0	0	0	0	0	0	0	0	0	0	0	0	0	0	0	0	0	0	0	0	ARO:1000001 ! process or component of antibiotic biology or chemistry|ARO:3000000 ! determinant of antibiotic resistance|ARO:3000104 ! aminoglycoside resistance gene|ARO:3000121 ! aminoglycoside acetyltransferase (AAC)|ARO:3000322 ! AAC(3)
gi|30171089|ARO_3002625|ANT(4_)-IIb__Pseudomonas_aeruginosa_	0	0	0	0	0	0	0	0	0	0	0	0	0	0	0	0	0	0	0	0	0	0	0	0	0	0	0	0	0	0	0	0	0	0	0	0	0	0	0	0	0	0	0	0	0	0	0	0	ARO:1000001 ! process or component of antibiotic biology or chemistry|ARO:3000000 ! determinant of antibiotic resistance|ARO:3000104 ! aminoglycoside resistance gene|ARO:3000218 ! aminoglycoside nucleotidyltransferase (ANT)|ARO:3000229 ! ANT(4')
gi|303645|ARO_3001300|myrA__Micromonospora_griseorubida_	0	0	0	0	0	0	0	0	0	0	0	0	0	0	0	0	0	0	0	0	0	0	0	0	0	0	0	0	0	0	0	0	0	0	0	0	0	0	0	0	0	0	0	0	0	0	0	0	ARO:1000001 ! process or component of antibiotic biology or chemistry|ARO:3000000 ! determinant of antibiotic resistance|ARO:3000519 ! antibiotic target modifying enzyme|ARO:3000164 ! rRNA methyltransferase conferring antibiotic resistance|ARO:3001298 ! non-erm 23S ribosomal RNA methyltransferase (G748)
gi|30387188|ARO_3002675|catB2__Pasteurella_multocida_	0	0	0	0	0	0	0	0	0	0	0	0	0	0	0	0	0	0	0	0	0	0	0	0	0	0	0	0	0	0	0	0	0	0	0	0	0	0	0	0	0	0	0	0	0	0	0	0	ARO:1000001 ! process or component of antibiotic biology or chemistry|ARO:3000000 ! determinant of antibiotic resistance|ARO:3000557 ! antibiotic inactivation enzyme|ARO:3000122 ! chloramphenicol acetyltransferase (CAT)
gi|306485917|ARO_3000553|adeR__Acinetobacter_baumannii_	0	0	0	0	0	0	0	0	0	0	0	0	0	0	0	0	0	0	0	0	0	0	0	0	0	0	0	0	0	0	0	0	0	0	0	0	0	0	0	0	0	0	0	0	0	0	0	0	ARO:1000001 ! process or component of antibiotic biology or chemistry|ARO:3000000 ! determinant of antibiotic resistance|ARO:3000451 ! gene modulating antibiotic efflux
gi|306485918|ARO_3000549|adeS__Acinetobacter_baumannii_	0	0	0	0	0	0	0	0	0	0	0	0	0	0	0	0	0	0	0	0	0	0	0	0	0	0	0	0	0	0	0	0	0	0	0	0	0	0	0	0	0	0	0	0	0	0	0	0	ARO:1000001 ! process or component of antibiotic biology or chemistry|ARO:3000000 ! determinant of antibiotic resistance|ARO:3000451 ! gene modulating antibiotic efflux
gi|306773838|ARO_3002069|CMY-59__Escherichia_coli_	0	0	0	0	0	0	0	0	0	0	0	0	0	0	0	0	0	0	0	0	0	0	0	0	0	0	0	0	0	0	0	0	0	0	0	0	0	0	0	0	0	0	0	0	0	0	0	0	ARO:1000001 ! process or component of antibiotic biology or chemistry|ARO:3000000 ! determinant of antibiotic resistance|ARO:3000129 ! beta-lactam resistance gene|ARO:3000001 ! beta-lactamase|ARO:3000076 ! class C beta-lactamase|ARO:3000085 ! CMY-LAT-MOX beta-lactamase|ARO:3000087 ! CMY-MOX beta-lactamase|ARO:3000069 ! CMY beta-lactamase
gi|30961998|ARO_3001671|OXA-49__Acinetobacter_baumannii_	0	0	0	0	0	0	0	0	0	0	0	0	0	0	0	0	0	0	0	0	0	0	0	0	0	0	0	0	0	0	0	0	0	0	0	0	0	0	0	0	0	0	0	0	0	0	0	0	ARO:1000001 ! process or component of antibiotic biology or chemistry|ARO:3000000 ! determinant of antibiotic resistance|ARO:3000129 ! beta-lactam resistance gene|ARO:3000001 ! beta-lactamase|ARO:3000075 ! class D beta-lactamase|ARO:3000017 ! OXA beta-lactamase
gi|310697969|ARO_3002598|ANT(3__)-Ii-AAC(6_)-IId_fusion_protein__Serratia_marcescens_	0	0	0	0	0	0	0	0	0	0	0	0	0	0	0	0	0	0	0	0	0	0	0	0	0	0	0	0	0	0	0	0	0	0	0	0	0	0	0	0	0	0	0	0	0	0	0	0	ARO:1000001 ! process or component of antibiotic biology or chemistry|ARO:3000000 ! determinant of antibiotic resistance|ARO:3000104 ! aminoglycoside resistance gene|ARO:3000218 ! aminoglycoside nucleotidyltransferase (ANT)
gi|312191071|ARO_3002646|APH(3_)-IIc__Stenotrophomonas_maltophilia_	0	0	0	0	0	0	0	0	0	0	0	0	0	0	0	0	0	0	0	0	0	0	0	0	0	0	0	0	0	0	0	0	0	0	0	0	0	0	0	0	0	0	0	0	0	0	0	0	ARO:1000001 ! process or component of antibiotic biology or chemistry|ARO:3000000 ! determinant of antibiotic resistance|ARO:3000557 ! antibiotic inactivation enzyme|ARO:3000114 ! aminoglycoside phosphotransferase (APH)|ARO:3000126 ! APH(3')
gi|313848515|ARO_3003106|Erm(42)__Pasteurella_multocida_	0	0	0	0	0	0	0	0	0	0	0	0	0	0	0	0	0	0	0	0	0	0	0	0	0	0	0	0	0	0	0	0	0	0	0	0	0	0	0	0	0	0	0	0	0	0	0	0	ARO:1000001 ! process or component of antibiotic biology or chemistry|ARO:3000000 ! determinant of antibiotic resistance|ARO:3000315 ! macrolide resistance gene|ARO:3000560 ! Erm 23S ribosomal RNA methyltransferase
gi|314912692|ARO_3000813|mexS__Pseudomonas_aeruginosa_PAK_	0	0	0	0	0	0	0	0	0	0	0	0	0	0	0	0	0	0	0	0	0	0	0	0	0	0	0	0	0	0	0	0	0	0	0	0	0	0	0	0	0	0	0	0	0	0	0	0	ARO:1000001 ! process or component of antibiotic biology or chemistry|ARO:3000000 ! determinant of antibiotic resistance|ARO:3000451 ! gene modulating antibiotic efflux
gi|315019228|ARO_3001805|OXA-198__Pseudomonas_aeruginosa_	0	0	0	0	0	0	0	0	0	0	0	0	0	0	0	0	0	0	0	0	0	0	0	0	0	0	0	0	0	0	0	0	0	0	0	0	0	0	0	0	0	0	0	0	0	0	0	0	ARO:1000001 ! process or component of antibiotic biology or chemistry|ARO:3000000 ! determinant of antibiotic resistance|ARO:3000129 ! beta-lactam resistance gene|ARO:3000001 ! beta-lactamase|ARO:3000075 ! class D beta-lactamase|ARO:3000017 ! OXA beta-lactamase
gi|319996806|ARO_3000245|RbpA__Mycobacterium_smegmatis_str__MC2_155_	0	0	0	0	0	0	0	0	0	0	0	0	0	0	0	0	0	0	0	0	0	0	0	0	0	0	0	0	0	0	0	0	0	0	0	0	0	0	0	0	0	0	0	0	0	0	0	0	ARO:1000001 ! process or component of antibiotic biology or chemistry|ARO:3000000 ! determinant of antibiotic resistance|ARO:3000383 ! rifampin resistance gene|ARO:3000507 ! rifampin resistance RNA polymerase-binding protein
gi|32329439|ARO_3001794|OXA-45__Pseudomonas_aeruginosa_	0	0	0	0	0	0	0	0	0	0	0	0	0	0	0	0	0	0	0	0	0	0	0	0	0	0	0	0	0	0	0	0	0	0	0	0	0	0	0	0	0	0	0	0	0	0	0	0	ARO:1000001 ! process or component of antibiotic biology or chemistry|ARO:3000000 ! determinant of antibiotic resistance|ARO:3000129 ! beta-lactam resistance gene|ARO:3000001 ! beta-lactamase|ARO:3000075 ! class D beta-lactamase|ARO:3000017 ! OXA beta-lactamase
gi|323541193|ARO_3002873|FosB3__Enterococcus_faecium_	0	0	0	0	0	0	0	0	0	0	0	0	0	0	0	0	0	0	0	0	0	0	0	0	0	0	0	0	0	0	0	0	0	0	0	0	0	0	1.15455	0	0	0	0	0	0	0	0	0	ARO:1000001 ! process or component of antibiotic biology or chemistry|ARO:3000000 ! determinant of antibiotic resistance|ARO:3000271 ! fosfomycin resistance gene|ARO:3000342 ! fosfomycin inactivation enzyme|ARO:3000133 ! fosfomycin thiol transferase
gi|32451212|ARO_3000197|tet36__Bacteroides_coprosuis_DSM_18011_	0	0	0	0	0	0	0	0	0	0	0	0	0	0	0	0	0	0	0	0	0	0	0	0	0	0	0	0	0	0	0	0	0	0	0	0	0	0	0	0	0	0	0	0	0	0	0	0	ARO:1000001 ! process or component of antibiotic biology or chemistry|ARO:3000000 ! determinant of antibiotic resistance|ARO:3000185 ! antibiotic target protection protein|ARO:0000002 ! tetracycline resistance ribosomal protection protein
gi|32470427|ARO_3002597|AAC(6_)-Ie-APH(2__)-Ia__Staphylococcus_aureus_	0	0	0	0	0	0	0	0	0	0	0	0	0	0	0	0	0	0	0	0	0	0	0	0	0	0	0	0	0	0	0	0	0	0	0	0	0	0	0	0	0	0	0	0	0	0	0	0	ARO:1000001 ! process or component of antibiotic biology or chemistry|ARO:3000000 ! determinant of antibiotic resistance|ARO:3000104 ! aminoglycoside resistance gene|ARO:3000121 ! aminoglycoside acetyltransferase (AAC)|ARO:3000345 ! AAC(6')
gi|327202838|ARO_3003112|lsaC__Streptococcus_agalactiae_	0	0	0	0	0	0	0	0	0	0	0	0	0	0	0	0	0	0	0	0	0	0	0	0	0	0	0	0	0	0	0	0	0	0	0	0	0	0	0	0	0	0	0	0	0	0	0	0	ARO:1000001 ! process or component of antibiotic biology or chemistry|ARO:3000000 ! determinant of antibiotic resistance|ARO:3000241 ! lincosamide resistance gene|ARO:3002880 ! lincosamide resistance efflux pump
gi|3294232|ARO_3000463|gimA_glycosyltransferase__Streptomyces_ambofaciens_	0	0	0	0	0	0	0	0	0	0	0	0	0	0	0	0	0	0	0	0	0	0	0	0	0	0	0	0	0	0	0	0	0	0	0	0	0	0	0	0	0	0	0	0	0	0	0	0	ARO:1000001 ! process or component of antibiotic biology or chemistry|ARO:3000000 ! determinant of antibiotic resistance|ARO:3000557 ! antibiotic inactivation enzyme|ARO:3000201 ! macrolide inactivation enzyme|ARO:3000458 ! macrolide glycosyltransferase
gi|33090253|ARO_3000569|tet41__Serratia_marcescens_	0	0	0	0	0	0	0	0	0	0	0	0	9.70822	0	0	0	0	0	0	0	0	0	0	0	0	0	0	0	0	0	0	0	0	0	19.7134	0	0	0	0	0	0	0	0	0	0	0	0	0	ARO:1000001 ! process or component of antibiotic biology or chemistry|ARO:3000000 ! determinant of antibiotic resistance|ARO:3000472 ! tetracycline resistance gene|ARO:3000239 ! tetracycline resistance efflux pump
gi|3309049|ARO_3000182|tetY__IncQ_plasmid_pIE1120_	0	0	0	0	0	0	0	0	0	0	0	0	0	0	0	0	0	0	0	0	0	0	0	0	0	0	0	0	0	0	0	0	0	0	0	0	0	0	0	0	0	0	0	0	0	0	0	0	ARO:1000001 ! process or component of antibiotic biology or chemistry|ARO:3000000 ! determinant of antibiotic resistance|ARO:3000472 ! tetracycline resistance gene|ARO:3000239 ! tetracycline resistance efflux pump
gi|33327079|ARO_3001808|OXA-60__Ralstonia_pickettii_	0	0	0	0	0	0	0	0	0	0	0	0	0	0	0	0	0	0	0	0	0	0	0	0	0	0	0	0	0	0	0	0	0	0	0	0	0	0	0	0	0	0	0	0	0	0	0	0	ARO:1000001 ! process or component of antibiotic biology or chemistry|ARO:3000000 ! determinant of antibiotic resistance|ARO:3000129 ! beta-lactam resistance gene|ARO:3000001 ! beta-lactamase|ARO:3000075 ! class D beta-lactamase|ARO:3000017 ! OXA beta-lactamase
gi|334261896|ARO_3002795|QnrS6__Aeromonas_hydrophila_	0	0	0	0	0	0	0	0	0	0	0	0	0	0	0	0	0	0	0	0	0	0	0	0	0	0	0	0	0	0	0	0	0	0	0	0	0	0	0	0	0	0	0	0	0	0	0	0	ARO:1000001 ! process or component of antibiotic biology or chemistry|ARO:3000000 ! determinant of antibiotic resistance|ARO:3000102 ! fluoroquinolone resistance gene|ARO:3000419 ! fluoroquinolone resistance protein
gi|334363452|ARO_3002872|FosA3__Escherichia_coli_	0	0	0	0	0	0	0	0	0	0	0	0	0	0	0	0	0	0	0	0	0	0	0	0	0	0	0	0	0	0	0	0	0	0	0	0	0	0	0	0	0	0	0	0	0	0	0	0	ARO:1000001 ! process or component of antibiotic biology or chemistry|ARO:3000000 ! determinant of antibiotic resistance|ARO:3000271 ! fosfomycin resistance gene|ARO:3000342 ! fosfomycin inactivation enzyme|ARO:3000133 ! fosfomycin thiol transferase
gi|335345651|ARO_3002218|IMP-27__Proteus_mirabilis_	0	0	0	0	0	0	0	0	0	0	0	0	0	0	0	0	0	0	0	0	0	0	0	0	0	0	0	0	0	0	0	0	0	0	0	0	0	0	0	0	0	0	0	0	0	0	0	0	ARO:1000001 ! process or component of antibiotic biology or chemistry|ARO:3000000 ! determinant of antibiotic resistance|ARO:3000129 ! beta-lactam resistance gene|ARO:3000001 ! beta-lactamase|ARO:3000004 ! class B (metallo-) beta-lactamase|ARO:3000568 ! subclass B1 (metallo-) beta-lactamase|ARO:3000020 ! IMP beta-lactamase
gi|339021682|ARO_3000410|sul1__Vibrio_fluvialis_	0	0	0	0	0	0	0	0	0	0	0	0	0	0	0	0	0	0	0	0	0	0	0	0	0	0	0	0	0	0	0	0	0	0	0	0	0	0	0	0	0	0	0	0	0	0	0	0	ARO:1000001 ! process or component of antibiotic biology or chemistry|ARO:3000000 ! determinant of antibiotic resistance|ARO:3000381 ! antibiotic target replacement protein
gi|342186827|ARO_3002833|vgaE__Staphylococcus_aureus_subsp__aureus_ST398_	0	0	0	0	0	0	0	0	0	0	0	0	0	0	0	0	0	0	0	0	0	0	0	0	0	0	0	0	0	0	0	0	0	0	0	0	0	0	0	0	0	0	0	0	0	0	0	0	ARO:1000001 ! process or component of antibiotic biology or chemistry|ARO:3000000 ! determinant of antibiotic resistance|ARO:3000240 ! streptogramin resistance gene|ARO:3000131 ! streptogramin resistance efflux pump|ARO:3000113 ! vga
gi|342674045|ARO_3002756|QnrB41__Citrobacter_freundii_	0	0	0	0	0	0	0	0	0	0	0	0	0	0	0	0	0	0	0	0	0	0	0	0	0	0	0	0	0	0	0	0	0	0	0	0	0	0	0	0	0	0	0	0	0	0	0	0	ARO:1000001 ! process or component of antibiotic biology or chemistry|ARO:3000000 ! determinant of antibiotic resistance|ARO:3000102 ! fluoroquinolone resistance gene|ARO:3000419 ! fluoroquinolone resistance protein
gi|34328030|ARO_3003111|lsaB__Staphylococcus_sciuri_	0	0	0	0	0	0	0	0	0	0	0	0	0	0	0	0	0	0	0	0	0	0	0	0	0	0	0	0	0	0	0.998393	0	0	0	0	0	0	0	0	0	0	0	0	0	0	0	0	0	ARO:1000001 ! process or component of antibiotic biology or chemistry|ARO:3000000 ! determinant of antibiotic resistance|ARO:3000241 ! lincosamide resistance gene|ARO:3002880 ! lincosamide resistance efflux pump
gi|34328031|ARO_3003441|cfrA__Staphylococcus_sciuri_	0	0	0	0	0	0	0	0	0	0	0	0	0	0	0	0	0	0	0	0	0	0	0	0	0	0	0	0	0	0	0	0	0	0	0	0	0	0	0	0	0	0	0	0	0	0	0	0	ARO:1000001 ! process or component of antibiotic biology or chemistry|ARO:3000000 ! determinant of antibiotic resistance|ARO:3000052 ! phenicol resistance gene|ARO:3000202 ! Cfr 23S ribosomal RNA methyltransferase
gi|34328034|ARO_3000599|Erm(33)__Staphylococcus_sciuri_	0	0	0	0	10.0901	0	0	0	0	0	0	0	0	0	0	6.54112	0	0	0	0	0	0	0	0	0	0	0	0	0	0	15.9743	0	0	0	0	4.39367	0	0	9.23637	15.7828	0	0	0	0	0	0	11.8628	0	ARO:1000001 ! process or component of antibiotic biology or chemistry|ARO:3000000 ! determinant of antibiotic resistance|ARO:3000315 ! macrolide resistance gene|ARO:3000560 ! Erm 23S ribosomal RNA methyltransferase
gi|34328603|ARO_3002670|cat__Bacillus_clausii_	0	0	0	0	0	0	0	0	0	0	0	0	0	0	0	0	0	0	0	0	0	0	0	0	0	0	0	0	0	0	0	0	0	0	0	0	0	0	0	0	0	0	0	0	0	0	0	0	ARO:1000001 ! process or component of antibiotic biology or chemistry|ARO:3000000 ! determinant of antibiotic resistance|ARO:3000557 ! antibiotic inactivation enzyme|ARO:3000122 ! chloramphenicol acetyltransferase (CAT)
gi|343480064|ARO_3001970|CTX-M-110__Shigella_sp__SH165_	0	0	0	0	0	0	0	0	0	0	0	0	0	0	0	0	0	0	0	0	0	0	0	0	0	0	0	0	0	0	0	0	0	0	0	0	0	0	0	0	0	0	0	0	0	0	0	0	ARO:1000001 ! process or component of antibiotic biology or chemistry|ARO:3000000 ! determinant of antibiotic resistance|ARO:3000129 ! beta-lactam resistance gene|ARO:3000001 ! beta-lactamase|ARO:3000078 ! class A beta-lactamase|ARO:3000016 ! CTX-M beta-lactamase
gi|343916462|ARO_3001809|OXA-209__Riemerella_anatipestifer_	0	0	0	0	0	0	0	0	0	0	0	0	0	0	0	0	0	0	0	0	0	0	0	0	0	0	0	0	0	0	0	0	0	0	0	0	0	0	0	0	0	0	0	0	0	0	0	0	ARO:1000001 ! process or component of antibiotic biology or chemistry|ARO:3000000 ! determinant of antibiotic resistance|ARO:3000129 ! beta-lactam resistance gene|ARO:3000001 ! beta-lactamase|ARO:3000075 ! class D beta-lactamase|ARO:3000017 ! OXA beta-lactamase
gi|3452580|ARO_3000423|FomA__Streptomyces_wedmorensis_	0	0	0	0	0	0	0	0	0	0	0	0	0	0	0	0	0	0	0	0	0	0	0	0	0	0	0	0	0	0	0	0	0	0	0	0	0	0	0	0	0	0	0	0	0	0	0	0	ARO:1000001 ! process or component of antibiotic biology or chemistry|ARO:3000000 ! determinant of antibiotic resistance|ARO:3000271 ! fosfomycin resistance gene|ARO:3000342 ! fosfomycin inactivation enzyme|ARO:3000359 ! fosfomycin phosphotransferase
gi|34591643|ARO_3001796|OXA-50__Pseudomonas_aeruginosa_	0	0	0	0	0	0	0	0	0	0	0	0	0	0	0	0	0	0	0	0	0	0	0	0	0	0	0	0	0	0	0	0	0	0	0	0	0	0	0	0	0	0	0	0	0	0	0	0	ARO:1000001 ! process or component of antibiotic biology or chemistry|ARO:3000000 ! determinant of antibiotic resistance|ARO:3000129 ! beta-lactam resistance gene|ARO:3000001 ! beta-lactamase|ARO:3000075 ! class D beta-lactamase|ARO:3000017 ! OXA beta-lactamase
gi|347990723|ARO_3002912|vanN__Enterococcus_faecium_	0	0	0	0	0	0	0	0	0	0	0	0	0	0	0	0	0	0	0	0	0	0	0	0	0	0	0	0	0	0	0	0	0	0	0	0	0	0	0	0	0	0	0	0	0	0	0	0	ARO:1000001 ! process or component of antibiotic biology or chemistry|ARO:3000000 ! determinant of antibiotic resistance|ARO:3000012 ! gene conferring antibiotic resistance via molecular bypass|ARO:3002976 ! gene associated with a glycopeptide resistance cluster|ARO:3002906 ! van ligase|ARO:3002979 ! D-Ala-D-Ser ligase
gi|347990724|ARO_3002969|vanXYN__Enterococcus_faecium_	0	0	0	0	0	0	0	0	0	0	0	0	0	0	0	0	0	0	0	0	0	0	0	0	0	0	0	0	0	0	0	0	0	0	0	0	0	0	0	0	0	0	0	0	0	0	0	0	ARO:1000001 ! process or component of antibiotic biology or chemistry|ARO:3000000 ! determinant of antibiotic resistance|ARO:3000012 ! gene conferring antibiotic resistance via molecular bypass|ARO:3002976 ! gene associated with a glycopeptide resistance cluster|ARO:3000496 ! vanXY
gi|347990726|ARO_3002929|vanRN__Enterococcus_faecium_	0	0	0	0	0	0	0	0	0	0	0	0	0	0	0	0	0	0	0	0	0	0	0	0	0	0	0	0	0	0	0	0	0	0	0	0	0	0	0	0	0	0	0	0	0	0	0	0	ARO:1000001 ! process or component of antibiotic biology or chemistry|ARO:3000000 ! determinant of antibiotic resistance|ARO:3000012 ! gene conferring antibiotic resistance via molecular bypass|ARO:3002976 ! gene associated with a glycopeptide resistance cluster|ARO:3002905 ! VanS-VanR two-component regulatory system|ARO:3000574 ! vanR
gi|347990727|ARO_3002940|vanSN__Enterococcus_faecium_	0	0	0	0	0	0	0	0	0	0	0	0	0	0	0	0	0	0	0	0	0	0	0	0	0	0	0	0	0	0	0	0	0	0	0	0	0	0	0	0	0	0	0	0	0	0	0	0	ARO:1000001 ! process or component of antibiotic biology or chemistry|ARO:3000000 ! determinant of antibiotic resistance|ARO:3000012 ! gene conferring antibiotic resistance via molecular bypass|ARO:3002976 ! gene associated with a glycopeptide resistance cluster|ARO:3002905 ! VanS-VanR two-component regulatory system|ARO:3000071 ! vanS
gi|351000054|ARO_3002660|APH(6)-Id__Escherichia_coli_	0	0	0	0	0	0	0	0	0	0	1.6639	0	0	0	0	0	0	0	0	0	0	0	0	0	0	0	0	0	0	0	0	0	0	0	0	0	0	0	0	0	0	0	0	0	0	0	0	0	ARO:1000001 ! process or component of antibiotic biology or chemistry|ARO:3000000 ! determinant of antibiotic resistance|ARO:3000557 ! antibiotic inactivation enzyme|ARO:3000114 ! aminoglycoside phosphotransferase (APH)|ARO:3000151 ! APH(6)
gi|356483107|ARO_3000854|SMB-1_beta-lactamase__Serratia_marcescens_	0	0	0	0	0	0	0	0	0	0	0	0	0	0	0	0	0	0	0	0	0	0	0	0	0	0	0	0	0	0	0	0	0	0	0	0	0	0	0	0	0	0	0	0	0	0	0	0	ARO:1000001 ! process or component of antibiotic biology or chemistry|ARO:3000000 ! determinant of antibiotic resistance|ARO:3000129 ! beta-lactam resistance gene|ARO:3000001 ! beta-lactamase|ARO:3000004 ! class B (metallo-) beta-lactamase|ARO:3000571 ! subclass B3 (metallo-) beta-lactamase
gi|356668591|ARO_3001777|OXA-347__uncultured_bacterium_	0	0	0	0	0	0	0	0	0	0	0	0	0	0	0	0	0	0	0	0	0	0	0	0	0	0	0	0	0	0	0	0	0	0	0	0	0	0	0	0	0	0	0	0	0	0	0	0	ARO:1000001 ! process or component of antibiotic biology or chemistry|ARO:3000000 ! determinant of antibiotic resistance|ARO:3000129 ! beta-lactam resistance gene|ARO:3000001 ! beta-lactamase|ARO:3000075 ! class D beta-lactamase|ARO:3000017 ! OXA beta-lactamase
gi|359751191|ARO_3001502|OXA-256__Enterobacter_cloacae_	0	0	0	0	0	0	0	0	0	0	0	0	0	0	0	0	0	0	0	0	0	0	0	0	0	0	0	0	0	0	0	0	0	0	0	0	0	0	0	0	0	0	0	0	0	0	0	0	ARO:1000001 ! process or component of antibiotic biology or chemistry|ARO:3000000 ! determinant of antibiotic resistance|ARO:3000129 ! beta-lactam resistance gene|ARO:3000001 ! beta-lactamase|ARO:3000075 ! class D beta-lactamase|ARO:3000017 ! OXA beta-lactamase
gi|360040234|ARO_3001711|OXA-212__Acinetobacter_johnsonii_	0	0	0	0	0	0	0	0	0	0	0	0	0	0	0	0	0	0	0	0	0	0	0	0	0	0	0	0	0	0	0	0	0	0	0	0	0	0	0	0	0	0	0	0	0	0	0	0	ARO:1000001 ! process or component of antibiotic biology or chemistry|ARO:3000000 ! determinant of antibiotic resistance|ARO:3000129 ! beta-lactam resistance gene|ARO:3000001 ! beta-lactamase|ARO:3000075 ! class D beta-lactamase|ARO:3000017 ! OXA beta-lactamase
gi|360040240|ARO_3001714|OXA-215__Acinetobacter_haemolyticus_	0	0	0	0	0	0	0	0	0	0	0	0	0	0	0	0	0	0	0	0	0	0	0	0	0	0	0	0	0	0	0	0	0	0	0	0	0	0	0	0	0	0	0	0	0	0	0	0	ARO:1000001 ! process or component of antibiotic biology or chemistry|ARO:3000000 ! determinant of antibiotic resistance|ARO:3000129 ! beta-lactam resistance gene|ARO:3000001 ! beta-lactamase|ARO:3000075 ! class D beta-lactamase|ARO:3000017 ! OXA beta-lactamase
gi|3617954|ARO_3002892|otrB__Streptomyces_rimosus_	0	0	0	0	0	0	0	0	0	0	0	0	0	0	0	0	0	0	0	0	0	0	0	0	0	0	0	0	0	0	0	0	0	0	0	0	0	0	0	0	0	0	0	0	0	0	0	0	ARO:1000001 ! process or component of antibiotic biology or chemistry|ARO:3000000 ! determinant of antibiotic resistance|ARO:3000472 ! tetracycline resistance gene|ARO:3000239 ! tetracycline resistance efflux pump
gi|3660656|ARO_3001308|VgbB__Staphylococcus_cohnii_	0	0	0	0	0	0	0	0	0	0	0	0	0	0	0	0	0	0	0	0	0	0	0	0	0	0	0	0	0	0	0	0	0	0	0	0	0	0	0	0	0	0	0	0	0	0	0	0	ARO:1000001 ! process or component of antibiotic biology or chemistry|ARO:3000000 ! determinant of antibiotic resistance|ARO:3000240 ! streptogramin resistance gene|ARO:3000233 ! streptogramin inactivation enzyme|ARO:3000376 ! streptogramin Vgb lyase
gi|3660657|ARO_3002842|vatC__Staphylococcus_cohnii_	0	0	0	0	0	0	0	0	0	0	0	0	0	0	0	0	0	0	0	0	0	0	0	0	0	0	0	0	0	0	0	0	0	0	0	0	0	0	0	0	0	0	0	0	0	0	0	0	ARO:1000001 ! process or component of antibiotic biology or chemistry|ARO:3000000 ! determinant of antibiotic resistance|ARO:3000240 ! streptogramin resistance gene|ARO:3000233 ! streptogramin inactivation enzyme|ARO:3000453 ! vat acetyltransferase
gi|366085573|ARO_3002356|NDM-6__Escherichia_coli_	0	0	0	0	0	0	0	0	0	0	0	0	0	0	0	0	0	0	0	0	0	0	0	0	0	0	0	0	0	0	0	0	0	0	0	0	0	0	0	0	0	0	0	0	0	0	0	0	ARO:1000001 ! process or component of antibiotic biology or chemistry|ARO:3000000 ! determinant of antibiotic resistance|ARO:3000129 ! beta-lactam resistance gene|ARO:3000001 ! beta-lactamase|ARO:3000004 ! class B (metallo-) beta-lactamase|ARO:3000568 ! subclass B1 (metallo-) beta-lactamase|ARO:3000057 ! NDM beta-lactamase
gi|37359440|ARO_3001780|OXA-85__Fusobacterium_nucleatum_	0	0	0	0	0	0	0	0	0	0	0	0	0	0	0	0	0	0	0	0	0	0	0	0	0	0	0	0	0	0	0	0	0	0	0	0	0	0	0	0	0	0	0	0	0	0	0	0	ARO:1000001 ! process or component of antibiotic biology or chemistry|ARO:3000000 ! determinant of antibiotic resistance|ARO:3000129 ! beta-lactam resistance gene|ARO:3000001 ! beta-lactamase|ARO:3000075 ! class D beta-lactamase|ARO:3000017 ! OXA beta-lactamase
gi|37359459|ARO_3000600|Erm(34)__Bacillus_clausii_	0	0	0	0	0	0	0	0	0	0	0	0	0	0	0	0	0	0	0	0	0	0	0	0	0	0	0	0	0	0	0	0	0	0	0	0	0	0	0	0	0	0	0	0	0	0	0	0	ARO:1000001 ! process or component of antibiotic biology or chemistry|ARO:3000000 ! determinant of antibiotic resistance|ARO:3000315 ! macrolide resistance gene|ARO:3000560 ! Erm 23S ribosomal RNA methyltransferase
gi|374282205|ARO_3002587|AAC(6_)-33__Escherichia_coli_	0	0	0	0	0	0	0	0	0	0	0	0	0	0	0	0	0	0	0	0	0	0	0	0	0	0	0	0	0	0	0	0	0	0	0	0	0	0	0	0	0	0	0	0	0	0	0	0	ARO:1000001 ! process or component of antibiotic biology or chemistry|ARO:3000000 ! determinant of antibiotic resistance|ARO:3000104 ! aminoglycoside resistance gene|ARO:3000121 ! aminoglycoside acetyltransferase (AAC)|ARO:3000345 ! AAC(6')
gi|374434363|ARO_3000448|qepA__Enterobacter_aerogenes_	0	0	0	0	0	0	0	0	0	0	0	0	0	0	0	0	0	0	0	0	0	0	0	0	0	0	0	0	0	0	0	0	0	0	0	0	0	0	0	0	0	0	0	0	0	0	0	0	ARO:1000001 ! process or component of antibiotic biology or chemistry|ARO:3000000 ! determinant of antibiotic resistance|ARO:3000102 ! fluoroquinolone resistance gene|ARO:3002899 ! fluoroquinolone resistance efflux pump
gi|37653302|ARO_3002599|AAC(6_)-30_AAC(6_)-Ib__fusion_protein__Pseudomonas_aeruginosa_	0	0	0	0	0	0	0	0	0	0	0	0	0	0	0	0	0	0	0	0	0	0	0	0	0	0	0	0	0	0	0	0	0	0	0	0	0	0	0	0	0	0	0	0	0	0	0	0	ARO:1000001 ! process or component of antibiotic biology or chemistry|ARO:3000000 ! determinant of antibiotic resistance|ARO:3000104 ! aminoglycoside resistance gene|ARO:3000121 ! aminoglycoside acetyltransferase (AAC)|ARO:3000345 ! AAC(6')
gi|37789889|ARO_3001813|OXA-55__Shewanella_algae_	0	0	0	0	0	0	0	0	0	0	0	0	0	0	0	0	0	0	0	0	0	0	0	0	0	0	0	0	0	0	0	0	0	0	0	0	0	0	0	0	0	0	0	0	0	0	0	0	ARO:1000001 ! process or component of antibiotic biology or chemistry|ARO:3000000 ! determinant of antibiotic resistance|ARO:3000129 ! beta-lactam resistance gene|ARO:3000001 ! beta-lactamase|ARO:3000075 ! class D beta-lactamase|ARO:3000017 ! OXA beta-lactamase
gi|379070467|ARO_3003041|PBP1a__Streptococcus_pneumoniae_	0	0	0	0	0	0	0	0	0	0	0	0	0	0	0	0	0	0	0	0	0	0	0	0	0	0	0	0	0	0	0	0	0	0	0	0	0	0	0	0	0	0	0	0	0	0	0	0	ARO:1000001 ! process or component of antibiotic biology or chemistry|ARO:3000000 ! determinant of antibiotic resistance|ARO:3000381 ! antibiotic target replacement protein|ARO:3003040 ! beta-lactam resistant penicillin-binding proteins
gi|379070607|ARO_3003043|PBP2x__Streptococcus_pneumoniae_	0	0	0	0	0	0	0	0	0	0	0	0	0	0	0	0	0	0	0	0	0	0	0	0	0	0	0	0	0	0	0	0	0	0	0	0	0	0	0	0	0	0	0	0	0	0	0	0	ARO:1000001 ! process or component of antibiotic biology or chemistry|ARO:3000000 ! determinant of antibiotic resistance|ARO:3000381 ! antibiotic target replacement protein|ARO:3003040 ! beta-lactam resistant penicillin-binding proteins
gi|37955063|ARO_3002248|CARB-9__Vibrio_cholerae_non-O1_non-O139_	0	0	0	0	0	0	0	0	0	0	0	0	0	0	0	0	0	0	0	0	0	0	0	0	0	0	0	0	0	0	0	0	0	0	0	0	0	0	0	0	0	0	0	0	0	0	0	0	ARO:1000001 ! process or component of antibiotic biology or chemistry|ARO:3000000 ! determinant of antibiotic resistance|ARO:3000129 ! beta-lactam resistance gene|ARO:3000001 ! beta-lactamase|ARO:3000078 ! class A beta-lactamase|ARO:3000091 ! CARB beta-lactamase
gi|3800832|ARO_3000598|Erm(31)__Streptomyces_venezuelae_	0	0	0	0	0	0	0	0	0	0	0	0	0	0	0	0	0	0	0	0	0	0	0	0	0	0	0	0	0	0	0	0	0	0	0	0	0	0	0	0	0	0	0	0	0	0	0	0	ARO:1000001 ! process or component of antibiotic biology or chemistry|ARO:3000000 ! determinant of antibiotic resistance|ARO:3000315 ! macrolide resistance gene|ARO:3000560 ! Erm 23S ribosomal RNA methyltransferase
gi|3800833|ARO_3001265|Erm(30)__Streptomyces_venezuelae_	0	0	0	0	0	0	0	0	0	0	0	0	0	0	0	0	0	0	0	0	0	0	0	0	0	0	0	0	0	0	0	0	0	0	0	0	0	0	0	0	0	0	0	0	0	0	0	0	ARO:1000001 ! process or component of antibiotic biology or chemistry|ARO:3000000 ! determinant of antibiotic resistance|ARO:3000315 ! macrolide resistance gene|ARO:3000560 ! Erm 23S ribosomal RNA methyltransferase
gi|381358442|ARO_3000856|BJP-1__Bradyrhizobium_sp__S23321_	0	0	0	0	0	0	0	0	0	0	0	0	0	0	0	0	0	0	0	0	0	0	0	0	0	0	0	0	0	0	0	0	0	0	0	0	0	0	0	0	0	0	0	0	0	0	0	0	ARO:1000001 ! process or component of antibiotic biology or chemistry|ARO:3000000 ! determinant of antibiotic resistance|ARO:3000129 ! beta-lactam resistance gene|ARO:3000001 ! beta-lactamase|ARO:3000004 ! class B (metallo-) beta-lactamase|ARO:3000571 ! subclass B3 (metallo-) beta-lactamase
gi|38141873|ARO_3002607|aadA7__Vibrio_fluvialis_	0	0	0	0	0	0	0	0	0	0	0	0	0	0	0	0	0	0	0	0	0	0	0	0	0	0	0	0	0	0	0	0	0	0	0	0	0	0	0	0	0	0	0	0	0	0	0	0	ARO:1000001 ! process or component of antibiotic biology or chemistry|ARO:3000000 ! determinant of antibiotic resistance|ARO:3000104 ! aminoglycoside resistance gene|ARO:3000218 ! aminoglycoside nucleotidyltransferase (ANT)|ARO:3000232 ! ANT(3'')-Ia
gi|38259411|ARO_3002641|APH(3_)-Ia__Serratia_marcescens_	0	0	0	0	0	0	0	3.73414	0	0	0	0	0	0	0	0	0	0	0	0	0	0	0	0	0	0	0	0	2.07262	0	1.0418	0	0	0	0	0	0	0	1.20474	0	0	0	0	0	0	0	0	0	ARO:1000001 ! process or component of antibiotic biology or chemistry|ARO:3000000 ! determinant of antibiotic resistance|ARO:3000557 ! antibiotic inactivation enzyme|ARO:3000114 ! aminoglycoside phosphotransferase (APH)|ARO:3000126 ! APH(3')
gi|38259517|ARO_3000168|tetD__Serratia_marcescens_	0	0	0	0	0	0	0	0	0	0	0	0	0	0	0	0	0	0	0	0	0	0	0	0	0	0	0	0	0	0	0	0	0	0	0	0	0	0	0	0	0	0	0	0	0	0	0	0	ARO:1000001 ! process or component of antibiotic biology or chemistry|ARO:3000000 ! determinant of antibiotic resistance|ARO:3000472 ! tetracycline resistance gene|ARO:3000239 ! tetracycline resistance efflux pump
gi|383110509|ARO_3003196|tet45__Escherichia_coli_	0	0	0	0	0	0	0	0	0	0	0	0	0	0	0	0	0	0	0	0	0	0	0	0	0	0	0	0	0	0	0	0	0	0	0	0	0	0	0	0	0	0	0	0	0	0	0	0	ARO:1000001 ! process or component of antibiotic biology or chemistry|ARO:3000000 ! determinant of antibiotic resistance|ARO:3000159 ! efflux pump conferring antibiotic resistance|ARO:0010002 ! major facilitator superfamily (MFS) antibiotic efflux pump
gi|383471865|ARO_3001328|mdfA__Escherichia_coli_	0	0	0	0	0	0	0	0	0	0	0	0	0	0	0	0	0	0	0	0	0	0	0	0	0	0	0	0	0	0	0	0	0	0	0	0	0	0	0	0	0	0	0	0	0	0	0	0	ARO:1000001 ! process or component of antibiotic biology or chemistry|ARO:3000000 ! determinant of antibiotic resistance|ARO:3000159 ! efflux pump conferring antibiotic resistance|ARO:0010002 ! major facilitator superfamily (MFS) antibiotic efflux pump
gi|383478992|ARO_3001677|OXA-236__Acinetobacter_baumannii_	0	0	0	0	0	0	0	0	0	0	0	0	0	0	0	0	0	0	0	0	0	0	0	0	0	0	0	0	0	0	0	0	0	0	0	0	0	0	0	0	0	0	0	0	0	0	0	0	ARO:1000001 ! process or component of antibiotic biology or chemistry|ARO:3000000 ! determinant of antibiotic resistance|ARO:3000129 ! beta-lactam resistance gene|ARO:3000001 ! beta-lactamase|ARO:3000075 ! class D beta-lactamase|ARO:3000017 ! OXA beta-lactamase
gi|383502324|ARO_3003039|oprA__Pseudomonas_aeruginosa_	0	0	0	0	0	0	0	0	0	0	0	0	0	0	0	0	0	0	0	0	0	0	0	0	0	0	0	0	0	0	0	0	0	0	0	0	0	0	0	0	0	0	0	0	0	0	0	0	ARO:1000001 ! process or component of antibiotic biology or chemistry|ARO:3000000 ! determinant of antibiotic resistance|ARO:3000159 ! efflux pump conferring antibiotic resistance|ARO:3000748 ! subunit of efflux pump conferring antibiotic resistance
gi|38427155|ARO_3000090|BLA1__Bacillus_anthracis_	0	0	0	0	0	0	0	0	0	0	0	0	0	0	0	0	0	0	0	0	0	0	0	0	0	0	0	0	0	0	0	0	0	0	0	0	0	0	0	0	0	0	0	0	0	0	0	0	ARO:1000001 ! process or component of antibiotic biology or chemistry|ARO:3000000 ! determinant of antibiotic resistance|ARO:3000129 ! beta-lactam resistance gene|ARO:3000001 ! beta-lactamase|ARO:3000078 ! class A beta-lactamase
gi|38490045|ARO_3002529|AAC(3)-Id__Salmonella_enterica_subsp__enterica_serovar_Newport_	0	0	0	0	0	0	0	0	0	0	0	0	0	0	0	0	0	0	0	0	0	0	0	0	0	0	0	0	0	0	0	0	0	0	0	0	0	0	0	0	0	0	0	0	0	0	0	0	ARO:1000001 ! process or component of antibiotic biology or chemistry|ARO:3000000 ! determinant of antibiotic resistance|ARO:3000104 ! aminoglycoside resistance gene|ARO:3000121 ! aminoglycoside acetyltransferase (AAC)|ARO:3000322 ! AAC(3)
gi|385203110|ARO_3002522|novA__Streptomyces_niveus_	0	0	0	0	0	0	0	0	0	0	0	0	0	0	0	0	0	0	0	0	0	0	0	0	0	0	0	0	0	0	0	0	0	0	0	0	0	0	0	0	0	0	0	0	0	0	0	0	ARO:1000001 ! process or component of antibiotic biology or chemistry|ARO:3000000 ! determinant of antibiotic resistance|ARO:3000159 ! efflux pump conferring antibiotic resistance|ARO:0010001 ! ATP-binding cassette (ABC) antibiotic efflux pump
gi|3860032|ARO_3000561|tet30__Agrobacterium_tumefaciens_str__C58_	0	0	0	0	0	0	0	0	0	0	0	0	0	0	0	0	0	0	0	0	0	0	0	0	0	0	0	0	0	0	0	0	0	0	0	0	0	0	0	0	0	0	0	0	0	0	0	0	ARO:1000001 ! process or component of antibiotic biology or chemistry|ARO:3000000 ! determinant of antibiotic resistance|ARO:3000159 ! efflux pump conferring antibiotic resistance|ARO:0010002 ! major facilitator superfamily (MFS) antibiotic efflux pump
gi|386372242|ARO_3002666|rmtF__Klebsiella_pneumoniae_	0	0	0	0	0	0	0	0	0	0	0	0	0	0	0	0	0	0	0	0	0	0	0	0	0	0	0	0	0	0	0	0	0	0	0	0	0	0	0	0	0	0	0	0	0	0	0	0	ARO:1000001 ! process or component of antibiotic biology or chemistry|ARO:3000000 ! determinant of antibiotic resistance|ARO:3000519 ! antibiotic target modifying enzyme|ARO:3000164 ! rRNA methyltransferase conferring antibiotic resistance|ARO:3000857 ! 16S ribosomal RNA methyltransferase
gi|386372244|ARO_3002670|cat__Klebsiella_pneumoniae_	0	0	0	0	0	0	0	0	0	0	0	0	0	0	0	0	0	0	0	0	0	0	0	0	0	0	0	0	0	0	0	0	0	0	0	0	0	0	0	0	0	0	0	0	0	0	0	0	ARO:1000001 ! process or component of antibiotic biology or chemistry|ARO:3000000 ! determinant of antibiotic resistance|ARO:3000557 ! antibiotic inactivation enzyme|ARO:3000122 ! chloramphenicol acetyltransferase (CAT)
gi|38663|ARO_3002652|APH(3_)-VIa__Acinetobacter_baumannii_	0	0	0	0	0	0	0	0	0	0	0	0	0	0	0	0	0	0	0	0	0	0	0	0	0	0	0	0	0	0	0	0	0	0	0	0	0	0	0	0	0	0	0	0	0	0	0	0	ARO:1000001 ! process or component of antibiotic biology or chemistry|ARO:3000000 ! determinant of antibiotic resistance|ARO:3000557 ! antibiotic inactivation enzyme|ARO:3000114 ! aminoglycoside phosphotransferase (APH)|ARO:3000126 ! APH(3')
gi|3868984|ARO_3003033|mexY__Pseudomonas_aeruginosa_PAO1_	0	0	0	0	0	0	0	0	0	0	0	0	0	0	0	0	0	0	0	0	0	0	0	0	0	0	0	0	0	0	0	0	0	0	0	0	0	0	0	0	0	0	0	0	0	0	0	0	ARO:1000001 ! process or component of antibiotic biology or chemistry|ARO:3000000 ! determinant of antibiotic resistance|ARO:3000159 ! efflux pump conferring antibiotic resistance|ARO:3000748 ! subunit of efflux pump conferring antibiotic resistance
gi|387965694|ARO_3000825|robA__Enterobacter_cloacae_	0	0	0	0	0	0	0	0	0	0	0	0	0	0	0	0	0	0	0	0	0	0	0	0	0	0	0	0	0	0	0	0	0	0	0	0	0	0	0	0	0	0	0	0	0	0	0	0	ARO:1000001 ! process or component of antibiotic biology or chemistry|ARO:3000000 ! determinant of antibiotic resistance|ARO:3000451 ! gene modulating antibiotic efflux
gi|387965696|ARO_3000823|ramA__Enterobacter_cloacae_	0	0	0	0	0	0	0	0	0	0	0	0	0	0	0	0	0	0	0	0	0	0	0	0	0	0	0	0	0	0	0	0	0	0	0	0	0	0	0	0	0	0	0	0	0	0	0	0	ARO:1000001 ! process or component of antibiotic biology or chemistry|ARO:3000000 ! determinant of antibiotic resistance|ARO:3000451 ! gene modulating antibiotic efflux
gi|388459704|ARO_3000567|tet40__Streptococcus_suis_	0	0	0	0	0	0	0	0	0	0	0	0	0	0	0	0	0	0	0	0	0	0	0	0	0	0	0	0	0	0	0	0	0	0	0	0	0	0	0	0	0	0	0	0	0	0	0	0	ARO:1000001 ! process or component of antibiotic biology or chemistry|ARO:3000000 ! determinant of antibiotic resistance|ARO:3000159 ! efflux pump conferring antibiotic resistance|ARO:0010002 ! major facilitator superfamily (MFS) antibiotic efflux pump
gi|388476644|ARO_3000264|emrE__Escherichia_coli_str__K-12_substr__W3110_	0	0	0	0	0	0	0	0	0	0	0	0	0	0	0	0	0	0	0	0	0	0	0	0	0	0	0	0	0	0	0	0	0	0	0	0	0	0	0	0	0	0	0	0	0	0	0	0	ARO:1000001 ! process or component of antibiotic biology or chemistry|ARO:3000000 ! determinant of antibiotic resistance|ARO:3000159 ! efflux pump conferring antibiotic resistance|ARO:0010003 ! small multidrug resistance (SMR) antibiotic efflux pump
gi|388477133|ARO_3001329|mdtG__Escherichia_coli_str__K-12_substr__W3110_	0	0	0	0	0	0	0	0	0	0	0	0	0	0	0	0	0	0	0	0	0	0	0	0	0	0	0	0	0	0	0	0	0	0	0	0	0	0	0	0	0	0	0	0	0	0	0	0	ARO:1000001 ! process or component of antibiotic biology or chemistry|ARO:3000000 ! determinant of antibiotic resistance|ARO:3000159 ! efflux pump conferring antibiotic resistance|ARO:0010002 ! major facilitator superfamily (MFS) antibiotic efflux pump
gi|388477606|ARO_3000263|marA__Escherichia_coli_str__K-12_substr__W3110_	0	0	0	0	0	0	0	0	0	0	0	0	0	0	0	0	0	0	0	0	0	0	0	0	0	0	0	0	0	0	0	0	0	0	0	0	0	0	0	0	0	0	0	0	0	0	0	0	ARO:1000001 ! process or component of antibiotic biology or chemistry|ARO:3000000 ! determinant of antibiotic resistance|ARO:3000451 ! gene modulating antibiotic efflux
gi|388477739|ARO_3001327|mdtK__Escherichia_coli_str__K-12_substr__W3110_	0	0	0	0	0	0	0	0	0	0	0	0	0	0	0	0	0	0	0	0	0	0	0	0	0	0	0	0	0	0	0	0	0	0	0	0	0	0	0	0	0	0	0	0	0	0	0	0	ARO:1000001 ! process or component of antibiotic biology or chemistry|ARO:3000000 ! determinant of antibiotic resistance|ARO:3000159 ! efflux pump conferring antibiotic resistance|ARO:3000112 ! multidrug and toxic compound extrusion (MATE) transporter
gi|388478133|ARO_3000828|baeR__Escherichia_coli_str__K-12_substr__W3110_	0	0	0	0	0	0	0	0	0	0	0	0	0	0	0	0	0	0	0	0	0	0	0	0	0	0	0	0	0	0	0	0	0	0	0	0	0	0	0	0	0	0	0	0	0	0	0	0	ARO:1000001 ! process or component of antibiotic biology or chemistry|ARO:3000000 ! determinant of antibiotic resistance|ARO:3000451 ! gene modulating antibiotic efflux|ARO:3000750 ! subunit of gene modulating antibiotic efflux
gi|388478505|ARO_3000491|acrD__Escherichia_coli_str__K-12_substr__W3110_	0	0	0	0	0	0	0	0	0	0	0	0	0	0	0	0	0	0	0	0	0	0	0	0	0	0	0	0	0	0	0	0	0	0	0	0	0	0	0	0	0	0	0	0	0	0	0	0	ARO:1000001 ! process or component of antibiotic biology or chemistry|ARO:3000000 ! determinant of antibiotic resistance|ARO:3000159 ! efflux pump conferring antibiotic resistance|ARO:0010004 ! resistance-nodulation-cell division (RND) antibiotic efflux pump
gi|388479725|ARO_3000508|gadX__Escherichia_coli_str__K-12_substr__W3110_	0	0	0	0	0	0	0	0	0	0	0	0	0	0	0	0	0	0	0	0	0	0	0	0	0	0	0	0	0	0	0	0	0	0	0	0	0	0	0	0	0	0	0	0	0	0	0	0	ARO:1000001 ! process or component of antibiotic biology or chemistry|ARO:3000000 ! determinant of antibiotic resistance|ARO:3000451 ! gene modulating antibiotic efflux
gi|388480060|ARO_3003583|PmrB__Escherichia_coli_str__K-12_substr__W3110_	0	0	0	0	0	0	0	0	0	0	0	0	0	0	0	0	0	0	0	0	0	0	0	0	0	0	0	0	0	0	0	0	0	0	0	0	0	0	0	0	0	0	0	0	0	0	0	0	ARO:1000001 ! process or component of antibiotic biology or chemistry|ARO:3000000 ! determinant of antibiotic resistance|ARO:3002984 ! polymyxin resistance gene
gi|388534892|ARO_3000776|adeC__Enterococcus_faecium_DO_	0	0	0	0	0	0	0	0	0	0	0	0	0	0	0	0	0	0	0	0	0	0	0	0	0	0	0	0	0	0	0	0	0	0	0	0	0	0	0	0	0	0	0	0	0	0	0	0	ARO:1000001 ! process or component of antibiotic biology or chemistry|ARO:3000000 ! determinant of antibiotic resistance|ARO:3000159 ! efflux pump conferring antibiotic resistance|ARO:3000748 ! subunit of efflux pump conferring antibiotic resistance
gi|388890567|ARO_3001313|facT__Streptomyces_sp__WAC5292_	0	0	0	0	0	0	0	0	0	0	0	0	0	0	0	0	0	0	0	0	0	0	0	0	0	0	0	0	0	0	0	0	0	0	0	0	0	0	0	0	0	0	0	0	0	0	0	0	ARO:1000001 ! process or component of antibiotic biology or chemistry|ARO:3000000 ! determinant of antibiotic resistance|ARO:3001311 ! elfamycin resistance gene
gi|388891771|ARO_3002350|GES-21__uncultured_bacterium_	0	0	0	0	0	0	0	0	0	0	0	0	0	0	0	0	0	0	0	0	0	0	0	0	0	0	0	0	0	0	0	0	0	0	0	0	0	0	0	0	0	0	0	0	0	0	0	0	ARO:1000001 ! process or component of antibiotic biology or chemistry|ARO:3000000 ! determinant of antibiotic resistance|ARO:3000129 ! beta-lactam resistance gene|ARO:3000001 ! beta-lactamase|ARO:3000078 ! class A beta-lactamase|ARO:3000066 ! GES beta-lactamase
gi|3892237|ARO_3002826|EreA2__Providencia_stuartii_	0	0	0	0	0	0	0	0	0	0	0	0	0	0	0	0	0	0	0	0	0	0	0	0	0	0	0	0	0	0	0	0	0	0	0	0	0	0	0	0	0	0	0	0	0	0	0	0	ARO:1000001 ! process or component of antibiotic biology or chemistry|ARO:3000000 ! determinant of antibiotic resistance|ARO:3000557 ! antibiotic inactivation enzyme|ARO:3000201 ! macrolide inactivation enzyme|ARO:3000320 ! macrolide esterase
gi|3892629|ARO_3000175|tetH__Pasteurella_multocida_	0	0	0	0	0	0	0	0	0	0	0	0	0	0	0	0	0	0	0	0	0	0	0	0	0	0	0	0	0	0	0	0	0	0	0	0	0	0	0	0	0	0	0	0	0	0	0	0	ARO:1000001 ! process or component of antibiotic biology or chemistry|ARO:3000000 ! determinant of antibiotic resistance|ARO:3000159 ! efflux pump conferring antibiotic resistance|ARO:0010002 ! major facilitator superfamily (MFS) antibiotic efflux pump
gi|392295710|ARO_3001692|OXA-229__Acinetobacter_bereziniae_	0	0	0	0	0	0	0	0	0	0	0	0	0	0	0	0	0	0	0	0	0	0	0	0	0	0	0	0	0	0	0	0	0	0	0	0	0	0	0	0	0	0	0	0	0	0	0	0	ARO:1000001 ! process or component of antibiotic biology or chemistry|ARO:3000000 ! determinant of antibiotic resistance|ARO:3000129 ! beta-lactam resistance gene|ARO:3000001 ! beta-lactamase|ARO:3000075 ! class D beta-lactamase|ARO:3000017 ! OXA beta-lactamase
gi|39414|ARO_3002648|APH(3_)-IVa__Bacillus_circulans_	0	0	0	0	0	0	0	0	0	0	0	0	0	0	0	0	0	0	0	0	0	0	0	0	0	0	0	0	0	0	0	0	0	0	0	0	0	0	0	0	0	0	0	0	0	0	0	0	ARO:1000001 ! process or component of antibiotic biology or chemistry|ARO:3000000 ! determinant of antibiotic resistance|ARO:3000557 ! antibiotic inactivation enzyme|ARO:3000114 ! aminoglycoside phosphotransferase (APH)|ARO:3000126 ! APH(3')
gi|394759|ARO_3000191|tetQ__Bacteroides_fragilis_	0	0	0	0	0	0	0	0	0	0	0	0	7.16915	0	0	0	0	0	0	0	0	0	0	0	0	0	0	0	0	0	0	0	0	0	0	0	0	0	0	0	0	0	0	14.3786	0	0	0	0	ARO:1000001 ! process or component of antibiotic biology or chemistry|ARO:3000000 ! determinant of antibiotic resistance|ARO:3000185 ! antibiotic target protection protein|ARO:0000002 ! tetracycline resistance ribosomal protection protein
gi|39546293|ARO_3000791|mdsC__Salmonella_enterica_subsp__enterica_serovar_Typhimurium_str__LT2_	0	0	0	0	0	0	0	0	0	0	0	0	0	0	0	0	0	0	0	0	0	0	0	0	0	0	0	0	0	0	0	0	0	0	0	0	0	0	0	0	0	0	0	0	0	0	0	0	ARO:1000001 ! process or component of antibiotic biology or chemistry|ARO:3000000 ! determinant of antibiotic resistance|ARO:3000159 ! efflux pump conferring antibiotic resistance|ARO:3000748 ! subunit of efflux pump conferring antibiotic resistance
gi|39546294|ARO_3000789|mdsA__Salmonella_enterica_subsp__enterica_serovar_Typhimurium_str__LT2_	0	0	0	0	0	0	0	0	0	0	0	0	0	0	0	0	0	0	0	0	0	0	0	0	0	0	0	0	0	0	0	0	0	0	0	0	0	0	0	0	0	0	0	0	0	0	0	0	ARO:1000001 ! process or component of antibiotic biology or chemistry|ARO:3000000 ! determinant of antibiotic resistance|ARO:3000159 ! efflux pump conferring antibiotic resistance|ARO:3000748 ! subunit of efflux pump conferring antibiotic resistance
gi|396087|ARO_3003665|NmcR__Enterobacter_cloacae_	0	0	0	0	0	0	0	0	0	0	0	0	0	0	0	0	0	0	0	0	0	0	0	0	0	0	0	0	0	0	0	0	0	0	0	0	0	0	0	0	0	0	0	0	0	0	0	0	ARO:1000001 ! process or component of antibiotic biology or chemistry|ARO:3000000 ! determinant of antibiotic resistance|ARO:3000100 ! gene modulating beta-lactam resistance
gi|397133431|ARO_3001476|OXA-184__Campylobacter_jejuni_	0	0	0	0	0	0	0	0	0	0	0	0	0	0	0	0	0	0	0	0	0	0	0	0	0	0	0	0	0	0	0	0	0	0	0	0	0	0	0	0	0	0	0	0	0	0	0	0	ARO:1000001 ! process or component of antibiotic biology or chemistry|ARO:3000000 ! determinant of antibiotic resistance|ARO:3000129 ! beta-lactam resistance gene|ARO:3000001 ! beta-lactamase|ARO:3000075 ! class D beta-lactamase|ARO:3000017 ! OXA beta-lactamase
gi|397529008|ARO_3003205|Erm(43)__Staphylococcus_lentus_	0	0	0	0	0	0	0	0	0	0	0	0	0	0	0	0	0	0	0	0	0	0	0	0	0	0	0	0	0	0	0	0	0	0	0	0	0	0	0	0	0	0	0	0	0	0	0	0	ARO:1000001 ! process or component of antibiotic biology or chemistry|ARO:3000000 ! determinant of antibiotic resistance|ARO:3000315 ! macrolide resistance gene|ARO:3000560 ! Erm 23S ribosomal RNA methyltransferase
gi|397529834|ARO_3002883|rgt1438__Streptomyces_sp__WAC1438_	0	0	0	0	0	0	0	0	0	0	0	0	0	0	0	0	0	0	0	0	0	0	0	0	0	0	0	0	0	0	0	0	0	0	0	0	0	0	0	0	0	0	0	0	0	0	0	0	ARO:1000001 ! process or component of antibiotic biology or chemistry|ARO:3000000 ! determinant of antibiotic resistance|ARO:3000383 ! rifampin resistance gene|ARO:3000576 ! rifampin inactivation enzyme|ARO:3000443 ! rifampin glycosyltransferase
gi|397701676|ARO_3002226|IMP-35__Pseudomonas_aeruginosa_	0	0	0	0	0	0	0	0	0	0	0	0	0	0	0	0	0	0	0	0	0	0	0	0	0	0	0	0	0	0	0	0	0	0	0	0	0	0	0	0	0	0	0	0	0	0	0	0	ARO:1000001 ! process or component of antibiotic biology or chemistry|ARO:3000000 ! determinant of antibiotic resistance|ARO:3000129 ! beta-lactam resistance gene|ARO:3000001 ! beta-lactamase|ARO:3000004 ! class B (metallo-) beta-lactamase|ARO:3000568 ! subclass B1 (metallo-) beta-lactamase|ARO:3000020 ! IMP beta-lactamase
gi|398085|ARO_3002840|vatA__Staphylococcus_aureus_	0	0	0	0	0	0	0	0	0	0	0	0	0	0	0	0	0	0	0	0	0	0	0	0	0	0	0	0	0	0	0	0	0	0	0	0	0	0	0	0	0	0	0	0	0	0	0	0	ARO:1000001 ! process or component of antibiotic biology or chemistry|ARO:3000000 ! determinant of antibiotic resistance|ARO:3000240 ! streptogramin resistance gene|ARO:3000233 ! streptogramin inactivation enzyme|ARO:3000453 ! vat acetyltransferase
gi|39843363|ARO_3001792|OXA-62__Pandoraea_pnomenusa_	0	0	0	0	0	0	0	0	0	0	0	0	0	0	0	0	0	0	0	0	0	0	0	0	0	0	0	0	0	0	0	0	0	0	0	0	0	0	0	0	0	0	0	0	0	0	0	0	ARO:1000001 ! process or component of antibiotic biology or chemistry|ARO:3000000 ! determinant of antibiotic resistance|ARO:3000129 ! beta-lactam resistance gene|ARO:3000001 ! beta-lactamase|ARO:3000075 ! class D beta-lactamase|ARO:3000017 ! OXA beta-lactamase
gi|401668654|ARO_3002228|IMP-37__Pseudomonas_aeruginosa_	0	0	0	0	0	0	0	0	0	0	0	0	0	0	0	0	0	0	0	0	0	0	0	0	0	0	0	0	0	0	0	0	0	0	0	0	0	0	0	0	0	0	0	0	0	0	0	0	ARO:1000001 ! process or component of antibiotic biology or chemistry|ARO:3000000 ! determinant of antibiotic resistance|ARO:3000129 ! beta-lactam resistance gene|ARO:3000001 ! beta-lactamase|ARO:3000004 ! class B (metallo-) beta-lactamase|ARO:3000568 ! subclass B1 (metallo-) beta-lactamase|ARO:3000020 ! IMP beta-lactamase
gi|401668656|ARO_3001797|OXA-46__Pseudomonas_aeruginosa_	0	0	0	0	0	0	0	0	0	0	0	0	0	0	0	0	0	0	0	0	0	0	0	0	0	0	0	0	0	0	0	0	0	0	0	0	0	0	0	0	0	0	0	0	0	0	0	0	ARO:1000001 ! process or component of antibiotic biology or chemistry|ARO:3000000 ! determinant of antibiotic resistance|ARO:3000129 ! beta-lactam resistance gene|ARO:3000001 ! beta-lactamase|ARO:3000075 ! class D beta-lactamase|ARO:3000017 ! OXA beta-lactamase
gi|402660|ARO_3002688|catS__Streptococcus_pyogenes_	0	0	0	0	0	0	0	0	0	0	0	0	0	0	0	0	0	0	0	0	0	0	0	0	0	0	0	0	0	0	0	0	0	0	0	0	0	0	0	0	0	0	0	0	0	0	0	0	ARO:1000001 ! process or component of antibiotic biology or chemistry|ARO:3000000 ! determinant of antibiotic resistance|ARO:3000557 ! antibiotic inactivation enzyme|ARO:3000122 ! chloramphenicol acetyltransferase (CAT)
gi|402694353|ARO_3001610|OXA-243__Achromobacter_xylosoxidans_	0	0	0	0	0	0	0	0	0	0	0	0	0	0	0	0	0	0	0	0	0	0	0	0	0	0	0	0	0	0	0	0	0	0	0	0	0	0	0	0	0	0	0	0	0	0	0	0	ARO:1000001 ! process or component of antibiotic biology or chemistry|ARO:3000000 ! determinant of antibiotic resistance|ARO:3000129 ! beta-lactam resistance gene|ARO:3000001 ! beta-lactamase|ARO:3000075 ! class D beta-lactamase|ARO:3000017 ! OXA beta-lactamase
gi|40363826|ARO_3002925|vanRF__Paenibacillus_popilliae_ATCC_14706_	0	0	0	0	0	0	0	0	0	0	0	0	0	0	0	0	0	0	0	0	0	0	0	0	0	0	0	0	0	0	0	0	0	0	0	0	0	0	0	0	0	0	0	0	0	0	0	0	ARO:1000001 ! process or component of antibiotic biology or chemistry|ARO:3000000 ! determinant of antibiotic resistance|ARO:3000012 ! gene conferring antibiotic resistance via molecular bypass|ARO:3002976 ! gene associated with a glycopeptide resistance cluster|ARO:3002905 ! VanS-VanR two-component regulatory system|ARO:3000574 ! vanR
gi|40363827|ARO_3002936|vanSF__Paenibacillus_popilliae_ATCC_14706_	0	0	0	0	0	0	0	0	0	0	0	0	0	0	0	0	0	0	0	0	0	0	0	0	0	0	0	0	0	0	0	0	0	0	0	0	0	0	0	0	0	0	0	0	0	0	0	0	ARO:1000001 ! process or component of antibiotic biology or chemistry|ARO:3000000 ! determinant of antibiotic resistance|ARO:3000012 ! gene conferring antibiotic resistance via molecular bypass|ARO:3002976 ! gene associated with a glycopeptide resistance cluster|ARO:3002905 ! VanS-VanR two-component regulatory system|ARO:3000071 ! vanS
gi|40433|ARO_3002682|catD__Clostridium_difficile_	0	0	0	0	0	0	0	0	0	0	0	0	0	0	0	0	0	0	0	0	0	0	0	0	0	0	0	0	0	0	0	0	0	0	0	0	0	0	0	0	0	0	0	0	3.79569	0	0	0	ARO:1000001 ! process or component of antibiotic biology or chemistry|ARO:3000000 ! determinant of antibiotic resistance|ARO:3000557 ! antibiotic inactivation enzyme|ARO:3000122 ! chloramphenicol acetyltransferase (CAT)
gi|40437|ARO_3000596|ErmX__Corynebacterium_diphtheriae_	0	0	0	0	0	0	0	0	0	0	1.6239	0	0	0	0	2.26423	0	0	0	0	0	0	0	0	4.07303	0	0	0	0	0	5.52956	0.738053	0	0	0	1.52088	0	0	1.93164	0	0	0	0	0	0	0	0	0	ARO:1000001 ! process or component of antibiotic biology or chemistry|ARO:3000000 ! determinant of antibiotic resistance|ARO:3000315 ! macrolide resistance gene|ARO:3000560 ! Erm 23S ribosomal RNA methyltransferase
gi|406085|ARO_3000192|tetS__Listeria_monocytogenes_	0	0	0	0	0	0	0	0	0	0	0	0	20.1715	0	0	0	0	0	0	0	0	0	0	0	0	0	0	0	0	0	0	0	0	0	0	0	0	0	0	0	0	0	0	0	0	0	0	0	ARO:1000001 ! process or component of antibiotic biology or chemistry|ARO:3000000 ! determinant of antibiotic resistance|ARO:3000185 ! antibiotic target protection protein|ARO:0000002 ! tetracycline resistance ribosomal protection protein
gi|407810257|ARO_3002630|ANT(9)-Ia__Staphylococcus_aureus_	0	0	0	0	0	0	0	0	0	0	0	0	0	0	0	0	0	0	0	0	0	0	0	0	0	0	0	0	0	0	0	0	0	0	0	0	0	0	0	0	0	0	0	0	0	0	0	0	ARO:1000001 ! process or component of antibiotic biology or chemistry|ARO:3000000 ! determinant of antibiotic resistance|ARO:3000104 ! aminoglycoside resistance gene|ARO:3000218 ! aminoglycoside nucleotidyltransferase (ANT)|ARO:3000228 ! ANT(9)
gi|407810259|ARO_3003206|lsaE__Staphylococcus_aureus_	0	0	0	0	0	0	0	0	0	0	0	0	9.31989	0	0	0	0	0	0	0	0	0	0	0	0	0	0	0	0	0	0	0	0	0	0	0	0	0	0	0	0	0	0	0	0	0	0	0	ARO:1000001 ! process or component of antibiotic biology or chemistry|ARO:3000000 ! determinant of antibiotic resistance|ARO:3000241 ! lincosamide resistance gene|ARO:3002880 ! lincosamide resistance efflux pump
gi|40807669|ARO_3000602|Erm(39)__Mycobacterium_fortuitum_	0	0	0	0	0	0	0	0	0	0	0	0	0	0	0	0	0	0	0	0	0	0	0	0	0	0	0	0	0	0	0	0	0	0	0	0	0	0	0	0	0	0	0	0	0	0	0	0	ARO:1000001 ! process or component of antibiotic biology or chemistry|ARO:3000000 ! determinant of antibiotic resistance|ARO:3000315 ! macrolide resistance gene|ARO:3000560 ! Erm 23S ribosomal RNA methyltransferase
gi|40850658|ARO_3002894|otrC__Streptomyces_rimosus_	0	0	0	0	0	0	0	0	0	0	0	0	0	0	0	0	0	0	0	0	0	0	0	0	0	0	0	0	0	0	0	0	0	0	0	0	0	0	0	0	0	0	0	0	0	0	0	0	ARO:1000001 ! process or component of antibiotic biology or chemistry|ARO:3000000 ! determinant of antibiotic resistance|ARO:3000159 ! efflux pump conferring antibiotic resistance|ARO:0010001 ! ATP-binding cassette (ABC) antibiotic efflux pump
gi|408535167|ARO_3002233|IMP-42__Acinetobacter_soli_	0	0	0	0	0	0	0	0	0	0	0	0	0	0	0	0	0	0	0	0	0	0	0	0	0	0	0	0	0	0	0	0	0	0	0	0	0	0	0	0	0	0	0	0	0	0	4.27059	0	ARO:1000001 ! process or component of antibiotic biology or chemistry|ARO:3000000 ! determinant of antibiotic resistance|ARO:3000129 ! beta-lactam resistance gene|ARO:3000001 ! beta-lactamase|ARO:3000004 ! class B (metallo-) beta-lactamase|ARO:3000568 ! subclass B1 (metallo-) beta-lactamase|ARO:3000020 ! IMP beta-lactamase
gi|40876|ARO_3002539|AAC(3)-IVa__Escherichia_coli_	0	0	0	0	0	0	0	0	0	0	0	0	0	0	0	0	0	0	0	0	0	0	0	0	0	0	0	0	0	0	0	0	0	0	0	0	0	0	0	0	0	0	0	0	0	0	0	0	ARO:1000001 ! process or component of antibiotic biology or chemistry|ARO:3000000 ! determinant of antibiotic resistance|ARO:3000104 ! aminoglycoside resistance gene|ARO:3000121 ! aminoglycoside acetyltransferase (AAC)|ARO:3000322 ! AAC(3)
gi|40881|ARO_3002601|aadA__Escherichia_coli_	0	0	0	0	0	0	0	0	0	0	0	0	0	0	0	0	0	0	0	0	0	0	0	0	0	0	0	0	0	0	0	0	0	0	0	0	0	0	0	0	0	0	0	0	0	0	0	0	ARO:1000001 ! process or component of antibiotic biology or chemistry|ARO:3000000 ! determinant of antibiotic resistance|ARO:3000104 ! aminoglycoside resistance gene|ARO:3000218 ! aminoglycoside nucleotidyltransferase (ANT)|ARO:3000232 ! ANT(3'')-Ia
gi|40923|ARO_3002655|APH(4)-Ia__Escherichia_coli_	0	0	0	0	0	0	0	0	0	0	0	0	0	0	0	0	0	0	0	0	0	0	0	0	0	0	0	0	0	0	0	0	0	0	0	0	0	0	0	0	0	0	0	0	0	0	0	0	ARO:1000001 ! process or component of antibiotic biology or chemistry|ARO:3000000 ! determinant of antibiotic resistance|ARO:3000557 ! antibiotic inactivation enzyme|ARO:3000114 ! aminoglycoside phosphotransferase (APH)|ARO:3000155 ! APH(4)
gi|410301|ARO_3002523|AAC(2_)-Ia__Providencia_stuartii_	0	0	0	0	0	0	0	0	0	0	0	0	0	0	0	0	0	0	0	0	0	0	0	0	0	0	0	0	0	0	0	0	0	0	0	0	0	0	0	0	0	0	0	0	0	0	0	0	ARO:1000001 ! process or component of antibiotic biology or chemistry|ARO:3000000 ! determinant of antibiotic resistance|ARO:3000104 ! aminoglycoside resistance gene|ARO:3000121 ! aminoglycoside acetyltransferase (AAC)|ARO:3000341 ! AAC(2')
gi|4103865|ARO_3002875|dfrE__Enterococcus_faecalis_	0	0	0	0	0	0	0	0	0	0	0	0	0	0	0	0	0	0	0	0	0	0	0	0	0	0	0	0	0	0	0	0	0	0	0	0	0	0	0	0	0	0	0	0	0	0	0	0	ARO:1000001 ! process or component of antibiotic biology or chemistry|ARO:3000000 ! determinant of antibiotic resistance|ARO:3001217 ! trimethoprim resistance gene|ARO:3001218 ! trimethoprim resistant dihydrofolate reductase dfr
gi|4103867|ARO_3002867|dfrF__Enterococcus_faecalis_	0	0	0	0	0	0	0	0	0	0	0	0	0	0	0	0	0	0	0	0	0	0	0	0	1.83657	0	0	0	0	0	0	0	1.75366	0	0	0	0	0	0	0	0	0	0	0	0	0	0	0	ARO:1000001 ! process or component of antibiotic biology or chemistry|ARO:3000000 ! determinant of antibiotic resistance|ARO:3001217 ! trimethoprim resistance gene|ARO:3001218 ! trimethoprim resistant dihydrofolate reductase dfr
gi|4104705|ARO_3000177|tetJ__Proteus_mirabilis_	0	0	0	0	0	0	0	0	0	0	0	0	0	0	0	0	0	0	0	0	0	0	0	0	0	0	0	0	0	0	0	0	0	0	0	0	0	0	0	0	0	0	0	0	0	0	0	0	ARO:1000001 ! process or component of antibiotic biology or chemistry|ARO:3000000 ! determinant of antibiotic resistance|ARO:3000159 ! efflux pump conferring antibiotic resistance|ARO:0010002 ! major facilitator superfamily (MFS) antibiotic efflux pump
gi|413915525|ARO_3000621|PC1_beta-lactamase_(blaZ)__Staphylococcus_xylosus_	0	0	0	0	0	0	0	0	0	0	0	0	0	0	0	0	0	0	0	0	0	0	0	0	0	0	0	0	0	0	0	0	0	0	0	0	0	0	0	0	0	0	0	0	0	0	0	0	ARO:1000001 ! process or component of antibiotic biology or chemistry|ARO:3000000 ! determinant of antibiotic resistance|ARO:3000129 ! beta-lactam resistance gene|ARO:3000001 ! beta-lactamase|ARO:3000078 ! class A beta-lactamase
gi|41393043|ARO_3002704|fexA__Staphylococcus_lentus_	0	0	0	0	0	0	0	0	0	0	0	0	0	0	0	0	0	0	0	0	0	0	0	0	0	0	0	0	0	0	0	0	0	0	0	0	0	0	0	0	0	0	0	0	0	0	0	0	ARO:1000001 ! process or component of antibiotic biology or chemistry|ARO:3000000 ! determinant of antibiotic resistance|ARO:3000159 ! efflux pump conferring antibiotic resistance|ARO:0010002 ! major facilitator superfamily (MFS) antibiotic efflux pump|ARO:3001213 ! chloramphenicol resistance efflux pump
gi|414576|ARO_3002556|AAC(6_)-Ii__Enterococcus_faecium_	0	0	0	0	0	0	0	0	0	0	0	0	0	0	0	0	0	0	0	0	0	0	0	0	0	0	0	0	0	0	0	0	0	0	0	0	0	0	0	0	0	0	0	0	0	0	0	0	ARO:1000001 ! process or component of antibiotic biology or chemistry|ARO:3000000 ! determinant of antibiotic resistance|ARO:3000104 ! aminoglycoside resistance gene|ARO:3000121 ! aminoglycoside acetyltransferase (AAC)|ARO:3000345 ! AAC(6')
gi|4210927|ARO_3001299|tlrB__Streptomyces_fradiae_	0	0	0	0	0	0	0	0	0	0	0	0	0	0	0	0	0	0	0	0	0	0	0	0	0	0	0	0	0	0	0	0	0	0	0	0	0	0	0	0	0	0	0	0	0	0	0	0	ARO:1000001 ! process or component of antibiotic biology or chemistry|ARO:3000000 ! determinant of antibiotic resistance|ARO:3000519 ! antibiotic target modifying enzyme|ARO:3000164 ! rRNA methyltransferase conferring antibiotic resistance|ARO:3001298 ! non-erm 23S ribosomal RNA methyltransferase (G748)
gi|4218927|ARO_3001417|OXA-22__Ralstonia_pickettii_	0	0	0	0	0	0	0	0	0	0	0.931781	0	0	0	0	2.3548	0	1.54239	0	0	0	0	0	0	0	0	0	0	0	0	0	0	0	0	0	0	0	0	0	0	0	0	0	0	0	0	0	0	ARO:1000001 ! process or component of antibiotic biology or chemistry|ARO:3000000 ! determinant of antibiotic resistance|ARO:3000129 ! beta-lactam resistance gene|ARO:3000001 ! beta-lactamase|ARO:3000075 ! class D beta-lactamase|ARO:3000017 ! OXA beta-lactamase
gi|42415|ARO_3002553|AAC(6_)-If__Enterobacter_cloacae_	0	0	0	0	0	0	0	0	0	0	0	0	0	0	0	0	0	0	0	0	0	0	0	0	0	0	0	0	0	0	0	0	0	0	0	0	0	0	0	0	0	0	0	0	0	0	0	0	ARO:1000001 ! process or component of antibiotic biology or chemistry|ARO:3000000 ! determinant of antibiotic resistance|ARO:3000104 ! aminoglycoside resistance gene|ARO:3000121 ! aminoglycoside acetyltransferase (AAC)|ARO:3000345 ! AAC(6')
gi|42516779|ARO_3000845|GIM-1__Pseudomonas_aeruginosa_	0	0	0	0	0	0	0	0	0	0	0	0	0	0	0	0	0	0	0	0	0	0	0	0	0	0	0	0	0	0	0	0	0	0	0	0	0	0	0	0	0	0	0	0	0	0	0	0	ARO:1000001 ! process or component of antibiotic biology or chemistry|ARO:3000000 ! determinant of antibiotic resistance|ARO:3000129 ! beta-lactam resistance gene|ARO:3000001 ! beta-lactamase|ARO:3000004 ! class B (metallo-) beta-lactamase|ARO:3000568 ! subclass B1 (metallo-) beta-lactamase|ARO:3003195 ! GIM beta-lactamase
gi|437315|ARO_3002987|bcrA__Bacillus_licheniformis_	0	0	0	0	0	0	0	0	0	0	0	0	0	0	0	0	0	0	0	0	0	0	0	0	0	0	0	0	0	0	0	0	0	0	0	0	0	0	0	0	0	0	0	0	0	0	0	0	ARO:1000001 ! process or component of antibiotic biology or chemistry|ARO:3000000 ! determinant of antibiotic resistance|ARO:3000751 ! peptide antibiotic resistance gene|ARO:3003252 ! bacitracin resistance gene|ARO:3002990 ! bacitracin resistance efflux pump
gi|437316|ARO_3002988|bcrB__Bacillus_licheniformis_	0	0	0	0	0	0	0	0	0	0	0	0	0	0	0	0	0	0	0	0	0	0	0	0	0	0	0	0	0	0	0	0	0	0	0	0	0	0	0	0	0	0	0	0	0	0	0	0	ARO:1000001 ! process or component of antibiotic biology or chemistry|ARO:3000000 ! determinant of antibiotic resistance|ARO:3000159 ! efflux pump conferring antibiotic resistance|ARO:0010001 ! ATP-binding cassette (ABC) antibiotic efflux pump
gi|43747|ARO_3002659|APH(6)-Ic__Escherichia_coli_	0	0	0	0	0	0	0	0	0	0	0	0	0	0	0	0	0	0	0	0	0	0	0	0	0	0	0	0	0	0	0	0	0	0	0	0	0	0	0	0	0	0	0	0	0	0	0	0	ARO:1000001 ! process or component of antibiotic biology or chemistry|ARO:3000000 ! determinant of antibiotic resistance|ARO:3000557 ! antibiotic inactivation enzyme|ARO:3000114 ! aminoglycoside phosphotransferase (APH)|ARO:3000151 ! APH(6)
gi|43767|ARO_3002683|catI__Escherichia_coli_	0	0	0	0	0	0	0	0	0	0	0	0	0	0	0	0	0	0	0	0	0	0	0	0	0	0	0	0	0	0	0	0	0	0	0	0	0	0	0	0	0	0	0	0	0	0	0	0	ARO:1000001 ! process or component of antibiotic biology or chemistry|ARO:3000000 ! determinant of antibiotic resistance|ARO:3000557 ! antibiotic inactivation enzyme|ARO:3000122 ! chloramphenicol acetyltransferase (CAT)
gi|438854|ARO_3000378|mexB__Pseudomonas_aeruginosa_	0	0	0	0	0	0	0	0	0	0	0	0	0	0	0	0	0	0	0	0	0	0	0	0	0	0	0	0	0	0	0	0	0	0	0	0	0	0	0	0	0	0	0	0	0	0	0	0	ARO:1000001 ! process or component of antibiotic biology or chemistry|ARO:3000000 ! determinant of antibiotic resistance|ARO:3000159 ! efflux pump conferring antibiotic resistance|ARO:3000748 ! subunit of efflux pump conferring antibiotic resistance
gi|439727|ARO_3002656|APH(4)-Ib__Burkholderia_pseudomallei_	0	0	0	0	0	0	0	0	0	0	0	0	0	0	0	0	0	0	0	0	0	0	0	0	0	0	0	0	0	0	0	0	0	0	0	0	0	0	0	0	0	0	0	0	0	0	0	0	ARO:1000001 ! process or component of antibiotic biology or chemistry|ARO:3000000 ! determinant of antibiotic resistance|ARO:3000557 ! antibiotic inactivation enzyme|ARO:3000114 ! aminoglycoside phosphotransferase (APH)|ARO:3000155 ! APH(4)
gi|440200|ARO_3002528|AAC(3)-Ia__Cloning_vector_pUCGM_	0	0	0	0	0	0	0	0	0	0	0	0	0	0	0	0	0	0	0	0	0	0	0	0.773396	0	0	0	0	0	0	0	0	0	0	0	0	0	0	0	0	0	0	0	0	0	1.68212	0	0	ARO:1000001 ! process or component of antibiotic biology or chemistry|ARO:3000000 ! determinant of antibiotic resistance|ARO:3000104 ! aminoglycoside resistance gene|ARO:3000121 ! aminoglycoside acetyltransferase (AAC)|ARO:3000322 ! AAC(3)
gi|441088292|ARO_3002853|arr-8__Klebsiella_oxytoca_	0	0	0	0	0	0	0	0	0	0	0	0	0	0	0	0	0	0	0	0	0	0	0	0	0	0	0	0	0	0	0	0	0	0	0	0	0	0	0	0	0	0	0	0	0	0	0	0	ARO:1000001 ! process or component of antibiotic biology or chemistry|ARO:3000000 ! determinant of antibiotic resistance|ARO:3000383 ! rifampin resistance gene|ARO:3000576 ! rifampin inactivation enzyme|ARO:3000390 ! rifampin ADP-ribosyltransferase (Arr)
gi|441470573|ARO_3000251|msrA__Listeria_monocytogenes_	0	0	0	0	0	0	0	0	0	0	0	0	0	0	0	0	0	0	0	0	0	0	0	0	0	0	0	0	0	0	0	0	0	0	0	0	0	0	0	0	0	0	0	0	0	0	0	0	ARO:1000001 ! process or component of antibiotic biology or chemistry|ARO:3000000 ! determinant of antibiotic resistance|ARO:3000159 ! efflux pump conferring antibiotic resistance|ARO:0010001 ! ATP-binding cassette (ABC) antibiotic efflux pump
gi|441470650|ARO_3000026|mepA__Listeria_monocytogenes_	0	0	0	0	0	0	0	0	0	0	0	0	0	0	0	0	0	0	0	0	0	0	0	0	0	0	0	0	0	0	0	0	0	0	0	0	0	0	0	0	0	0	0	0	0	0	0	0	ARO:1000001 ! process or component of antibiotic biology or chemistry|ARO:3000000 ! determinant of antibiotic resistance|ARO:3000159 ! efflux pump conferring antibiotic resistance|ARO:3000112 ! multidrug and toxic compound extrusion (MATE) transporter
gi|441472633|ARO_3000421|norB__Listeria_monocytogenes_	0	0	0	0	0	0	0	0	0	0	0	0	0	0	0	0	0	0	0	0	0	0	0	0	0	0	0	0	0	0	0	0	0	0	0	0	0	0	0	0	0	0	0	0	0	0	0	0	ARO:1000001 ! process or component of antibiotic biology or chemistry|ARO:3000000 ! determinant of antibiotic resistance|ARO:3000159 ! efflux pump conferring antibiotic resistance|ARO:0010002 ! major facilitator superfamily (MFS) antibiotic efflux pump
gi|441494190|ARO_3002307|VIM-37__Pseudomonas_aeruginosa_	0	0	0	0	0	0	0	0	0	0	0	0	0	0	0	0	0	0	0	0	0	0	0	0	0	0	0	0	0	0	0	0	0	0	0	0	0	0	0	0	0	0	0	0	0	0	0	0	ARO:1000001 ! process or component of antibiotic biology or chemistry|ARO:3000000 ! determinant of antibiotic resistance|ARO:3000129 ! beta-lactam resistance gene|ARO:3000001 ! beta-lactamase|ARO:3000004 ! class B (metallo-) beta-lactamase|ARO:3000568 ! subclass B1 (metallo-) beta-lactamase|ARO:3000021 ! VIM beta-lactamase
gi|443429745|ARO_3000848|DIM-1__Enterobacter_sp__SL1_	0	0	0	0	0	0	0	0	0	0	0	0	0	0	0	0	0	0	0	0	0	0	0	0	0	0	0	0	0	0	0	0	0	0	0	0	0	0	0	0	0	0	0	0	0	0	0	0	ARO:1000001 ! process or component of antibiotic biology or chemistry|ARO:3000000 ! determinant of antibiotic resistance|ARO:3000129 ! beta-lactam resistance gene|ARO:3000001 ! beta-lactamase|ARO:3000004 ! class B (metallo-) beta-lactamase|ARO:3000568 ! subclass B1 (metallo-) beta-lactamase
gi|443906584|ARO_3002993|AQU-1__Aeromonas_dhakensis_	0	0	0	0	0	0	0	0	0	0	0	0	0	0	0	0	0	0	0	0	0	0	0	0	0	0	0	0	0	0	0	0	0	0	0	0	0	0	0	0	0	0	0	0	0	0	0	0	ARO:1000001 ! process or component of antibiotic biology or chemistry|ARO:3000000 ! determinant of antibiotic resistance|ARO:3000129 ! beta-lactam resistance gene|ARO:3000001 ! beta-lactamase|ARO:3000076 ! class C beta-lactamase|ARO:3002992 ! AQU beta-lactamase
gi|444236141|ARO_3001778|OXA-232__Escherichia_coli_	0	0	0	0	0	0	0	0	0	0	0	0	0	0	0	0	0	0	0	0	0	0	0	0	0	0	0	0	0	0	0	0	0	0	0	0	0	0	0	0	0	0	0	0	0	0	0	0	ARO:1000001 ! process or component of antibiotic biology or chemistry|ARO:3000000 ! determinant of antibiotic resistance|ARO:3000129 ! beta-lactam resistance gene|ARO:3000001 ! beta-lactamase|ARO:3000075 ! class D beta-lactamase|ARO:3000017 ! OXA beta-lactamase
gi|444327363|ARO_3002668|rmtG__Klebsiella_pneumoniae_	0	0	0	0	0	0	0	0	0	0	0	0	0	0	0	0	0	0	0	0	0	0	0	0	0	0	0	0	0	0	0	0	0	0	0	0	0	0	0	0	0	0	0	0	0	0	0	0	ARO:1000001 ! process or component of antibiotic biology or chemistry|ARO:3000000 ! determinant of antibiotic resistance|ARO:3000519 ! antibiotic target modifying enzyme|ARO:3000164 ! rRNA methyltransferase conferring antibiotic resistance|ARO:3000857 ! 16S ribosomal RNA methyltransferase
gi|444893738|ARO_3002525|AAC(2_)-Ic__Mycobacterium_tuberculosis_H37Rv_	0	0	0	0	0	0	0	0	0	0	0	0	0	1.51772	0	0	0	0.771197	0	0	0	0	0	0	0	0	0	0	0	0	0	0	0	0	0	0	0	0	0	1.42045	0	0	0	0	0	0	0	0	ARO:1000001 ! process or component of antibiotic biology or chemistry|ARO:3000000 ! determinant of antibiotic resistance|ARO:3000104 ! aminoglycoside resistance gene|ARO:3000121 ! aminoglycoside acetyltransferase (AAC)|ARO:3000341 ! AAC(2')
gi|444895153|ARO_3003060|tsnr__Mycobacterium_tuberculosis_H37Rv_	0	0	0	0	0	0	0	0	0	0	0	0	0	0	0	0	0	0	0	0	0	0	0	0	0	0	0	0	0	0	0	0	0	0	0	0	0	0	0	0	0	0	0	0	0	0	0	0	ARO:1000001 ! process or component of antibiotic biology or chemistry|ARO:3000000 ! determinant of antibiotic resistance|ARO:3000519 ! antibiotic target modifying enzyme|ARO:3000164 ! rRNA methyltransferase conferring antibiotic resistance|ARO:3003065 ! non-erm 23S ribosomal RNA methyltransferase (A1067)
gi|444895501|ARO_3000392|Erm(37)__Mycobacterium_tuberculosis_H37Rv_	0	0	0	0	0	0	0	0	0	0	0	0	0	0	0	0	0	0	0	0	0	0	0	0	0	0	0	0	0	0	0	0	0	0	0	0	0	0	0	0	0	0	0	0	0	0	0	0	ARO:1000001 ! process or component of antibiotic biology or chemistry|ARO:3000000 ! determinant of antibiotic resistance|ARO:3000315 ! macrolide resistance gene|ARO:3000560 ! Erm 23S ribosomal RNA methyltransferase
gi|444896800|ARO_3000816|mtrA__Mycobacterium_tuberculosis_H37Rv_	0	0	0	0	0	0	0	0	0	0	0	0	0	0	0	0	0	0	0	0	0	0	0	0	0	0	0	12.308	0	0	0	0	0	0	0	0	0	0	0	0	0	0	0	0	0	0	0	0	ARO:1000001 ! process or component of antibiotic biology or chemistry|ARO:3000000 ! determinant of antibiotic resistance|ARO:3000451 ! gene modulating antibiotic efflux
gi|444896916|ARO_3003035|mfpA__Mycobacterium_tuberculosis_H37Rv_	0	0	0	0	0	0	0	0	0	0	0	0	0	0	0	0	0	0	0	0	0	0	0	0	0	0	0	0	0	0	0	0	0	0	0	0	0	0	0	0	0	0	0	0	0	0	0	0	ARO:1000001 ! process or component of antibiotic biology or chemistry|ARO:3000000 ! determinant of antibiotic resistance|ARO:3000102 ! fluoroquinolone resistance gene|ARO:3000419 ! fluoroquinolone resistance protein
gi|44886010|ARO_3002593|AAC(6_)-Ib-SK__Streptomyces_kanamyceticus_	0	0	0	0	0	0	0	0	0	0	0	0	0	0	0	0	0	0	0	0	0	0	0	0	0	0	0	0	0	0	0	0	0	0	0	0	0	0	0	0	0	0	0	0	0	0	0	0	ARO:1000001 ! process or component of antibiotic biology or chemistry|ARO:3000000 ! determinant of antibiotic resistance|ARO:3000104 ! aminoglycoside resistance gene|ARO:3000121 ! aminoglycoside acetyltransferase (AAC)|ARO:3000345 ! AAC(6')
gi|44886071|ARO_3002572|AAC(6_)-Iad__Acinetobacter_pittii_	0	0	0	0	0	0	0	0	0	0	0	0	0	0	0	0	0	0	0	0	0	0	0	0	0	0	0	0	0	0	0	0	0	0	0	0	0	0	0	0	0	0	0	0	0	0	0	0	ARO:1000001 ! process or component of antibiotic biology or chemistry|ARO:3000000 ! determinant of antibiotic resistance|ARO:3000104 ! aminoglycoside resistance gene|ARO:3000121 ! aminoglycoside acetyltransferase (AAC)|ARO:3000345 ! AAC(6')
gi|44894131|ARO_3002372|VEB-3__Enterobacter_cloacae_	0	0	0	0	0	0	0	0	0	0	0	0	0	0	0	0	0	0	0	0	0	0	0	0	0	0	0	0	0	0	0	0	0	0	0	0	0	0	0	0	0	0	0	0	0	0	0	0	ARO:1000001 ! process or component of antibiotic biology or chemistry|ARO:3000000 ! determinant of antibiotic resistance|ARO:3000129 ! beta-lactam resistance gene|ARO:3000001 ! beta-lactamase|ARO:3000078 ! class A beta-lactamase|ARO:3000043 ! VEB beta-lactamase
gi|4493255|ARO_3003565|r39_beta-lactamase__Actinomadura_sp__R39_	0	0	0	0	0	0	0	0	0	0	0	0	0	0	0	0	0	0	0	0	0	0	0	0	0	0	0	0	0	0	0	0	0	0	0	0	0	0	0	0	0	0	0	0	0	0	0	0	ARO:1000001 ! process or component of antibiotic biology or chemistry|ARO:3000000 ! determinant of antibiotic resistance|ARO:3000129 ! beta-lactam resistance gene|ARO:3000001 ! beta-lactamase|ARO:3000075 ! class D beta-lactamase
gi|452084995|ARO_3001503|OXA-258__Achromobacter_ruhlandii_	0	0	0	0	0	0	0	0	0	0	0	0	0	0	0	0	0	0	0	0	0	0	0	0	0	0	0	0	0	0	0	0	0	0	0	0	0	0	0	0	0	0	0	0	0	0	0	0	ARO:1000001 ! process or component of antibiotic biology or chemistry|ARO:3000000 ! determinant of antibiotic resistance|ARO:3000129 ! beta-lactam resistance gene|ARO:3000001 ! beta-lactamase|ARO:3000075 ! class D beta-lactamase|ARO:3000017 ! OXA beta-lactamase
gi|45266|ARO_3002536|AAC(3)-IIIa__Pseudomonas_aeruginosa_	0	0	0	0	0	0	0	0	0	0	0	0	0	0	0	0	0	0	0	0	0	0	0	0	0	0	0	0	0	0	0	0	0	0	0	0	0	0	0	0	0	0	0	0	0	0	0	0	ARO:1000001 ! process or component of antibiotic biology or chemistry|ARO:3000000 ! determinant of antibiotic resistance|ARO:3000104 ! aminoglycoside resistance gene|ARO:3000121 ! aminoglycoside acetyltransferase (AAC)|ARO:3000322 ! AAC(3)
gi|4545123|ARO_3002970|vanTC__Enterococcus_gallinarum_	0	0	0	0	0	0	0	0	0	0	0	0	0	0	0	0	0	0	0	0	0	0	0	0	0	0	0	0	0	0	0	0	0	0	0	0	0	0	0	0	0	0	0	0	0	0	0	0	ARO:1000001 ! process or component of antibiotic biology or chemistry|ARO:3000000 ! determinant of antibiotic resistance|ARO:3000012 ! gene conferring antibiotic resistance via molecular bypass|ARO:3002976 ! gene associated with a glycopeptide resistance cluster|ARO:3000372 ! vanT
gi|45481|ARO_3000230|ANT(2__)-Ia__uncultured_bacterium_	0	0	0	0	0	0	0	0	0	0	0	0	0	0	0	0	0	0	0	0	0	0	0	0	0	0	0	0	0	0	0	0	0	0	0	0	0	0	0	0	0	0	0	0	0	0	0	0	ARO:1000001 ! process or component of antibiotic biology or chemistry|ARO:3000000 ! determinant of antibiotic resistance|ARO:3000104 ! aminoglycoside resistance gene|ARO:3000218 ! aminoglycoside nucleotidyltransferase (ANT)
gi|455437|ARO_3002554|AAC(6_)-Ig__Acinetobacter_haemolyticus_	0	0	0	0	0	0	0	0	0	0	0	0	0	0	0	0	0	0	0	0	0	0	0	0	0	0	0	0	0	0	0	0	0	0	0	0	0	0	0	0	0	0	0	0	0	0	0	0	ARO:1000001 ! process or component of antibiotic biology or chemistry|ARO:3000000 ! determinant of antibiotic resistance|ARO:3000104 ! aminoglycoside resistance gene|ARO:3000121 ! aminoglycoside acetyltransferase (AAC)|ARO:3000345 ! AAC(6')
gi|45593454|ARO_3000391|norA__Staphylococcus_epidermidis_	0	0	0	0	0	0	0	0	0	0	0	0	0	0	0	0	0	0	0	0	0	0	0	0	0	0	0	0	0	0	0	1.63149	0	0	0	0	0	0	0	0	0	0	0	0	0	0	0	0	ARO:1000001 ! process or component of antibiotic biology or chemistry|ARO:3000000 ! determinant of antibiotic resistance|ARO:3000159 ! efflux pump conferring antibiotic resistance|ARO:0010002 ! major facilitator superfamily (MFS) antibiotic efflux pump
gi|456034|ARO_3000180|tetA(P)__Clostridium_perfringens_	0	0	0	0	0	0	0	0	0	0	0	0	0	0	0	0	0	0	0	0	0	0	0	0	0	0	0	0	0	0	0	0	0	0	0	0	0	0	0	0	0	0	0	0	0	0	0	0	ARO:1000001 ! process or component of antibiotic biology or chemistry|ARO:3000000 ! determinant of antibiotic resistance|ARO:3000472 ! tetracycline resistance gene|ARO:3000239 ! tetracycline resistance efflux pump
gi|456035|ARO_3000195|tetB(P)__Clostridium_perfringens_	0	0	0	0	0	0	0	0	0	0	0	0	0	0	0	0	0	0	0	0	0	0	0	0	0	0	0	0	0	0	0	0	0	0	0	0	0	0	0	0	0	0	0	0	0	0	0	0	ARO:1000001 ! process or component of antibiotic biology or chemistry|ARO:3000000 ! determinant of antibiotic resistance|ARO:3000185 ! antibiotic target protection protein|ARO:0000002 ! tetracycline resistance ribosomal protection protein
gi|457208|ARO_3000593|ErmQ__Clostridium_perfringens_	0	0	0	0	0	0	0	0	0	0	0	0	0	0	0	0	0	0	0	0	0	0	0	0	0	0	0	0	0	0	0	0	0	0	0	0	0	0	0	0	0	0	0	0	0	0	0	0	ARO:1000001 ! process or component of antibiotic biology or chemistry|ARO:3000000 ! determinant of antibiotic resistance|ARO:3000315 ! macrolide resistance gene|ARO:3000560 ! Erm 23S ribosomal RNA methyltransferase
gi|458301|ARO_3003559|cepA_beta-lactamase__Bacteroides_fragilis_	0	0	0	0	0	0	0	0	0	0	0	0	0	0	0	0	0	0	0	0	0	0	0	0	0	0	0	0	0	0	0	0	0	0	0	0	0	0	0	0	0	0	0	0	0	0	0	0	ARO:1000001 ! process or component of antibiotic biology or chemistry|ARO:3000000 ! determinant of antibiotic resistance|ARO:3000129 ! beta-lactam resistance gene|ARO:3000001 ! beta-lactamase|ARO:3000078 ! class A beta-lactamase
gi|4583399|ARO_3000183|tetZ__Corynebacterium_glutamicum_	0	0	0	0	0	0	0	0	0	0	0	0	0	0	0	0	0	0	0	0	0	0	0	0	0	0	0	0	0	0	0	0	0	0	0	0	0	0	0	0	0	0	0	0	0	0	0	0	ARO:1000001 ! process or component of antibiotic biology or chemistry|ARO:3000000 ! determinant of antibiotic resistance|ARO:3000472 ! tetracycline resistance gene|ARO:3000239 ! tetracycline resistance efflux pump
gi|4585570|ARO_3000174|tetG__Pseudomonas_sp__	0	0	0	0	0	0	0	0	0	0	0	0	0	0	0	0	0	0	0	0	0	0	0	0	0	0	0	0	0	0	0	0	0	0	0	0	0	0	0	0	0	0	0	0	0	0	0	0	ARO:1000001 ! process or component of antibiotic biology or chemistry|ARO:3000000 ! determinant of antibiotic resistance|ARO:3000159 ! efflux pump conferring antibiotic resistance|ARO:0010002 ! major facilitator superfamily (MFS) antibiotic efflux pump
gi|45934794|ARO_3001302|chrB__Streptomyces_bikiniensis_	0	0	0	0	0	0	0	0	0	0	0	0	0	0	0	0	0	0	0	0	0	0	0	0	0	0	0	0	0	0	0	0	0	0	0	0	0	0	0	0	0	0	0	0	0	0	0	0	ARO:1000001 ! process or component of antibiotic biology or chemistry|ARO:3000000 ! determinant of antibiotic resistance|ARO:3000492 ! gene involved in self resistance to antibiotic
gi|45944|ARO_3002533|AAC(3)-IIa__Plasmid_pWP113a_	0	0	0	0	0	0	0	0	0	0	0	0	0	0	0	0	0	0	0	0	0	0	0	0	0	0	0	0	0	0	0	0	0	0	0	0	0	0	0	0	0	0	0	0	0	0	0	0	ARO:1000001 ! process or component of antibiotic biology or chemistry|ARO:3000000 ! determinant of antibiotic resistance|ARO:3000104 ! aminoglycoside resistance gene|ARO:3000121 ! aminoglycoside acetyltransferase (AAC)|ARO:3000322 ! AAC(3)
gi|45990|ARO_3003563|NPS_beta-lactamase__Rhodobacter_capsulatus_	0	0	0	0	0	0	0	0	0	0	0	0	0	0	0	0	0	0	0	0	0	0	0	0	0	0	0	0	0	0	0	0	0	0	0	0	0	0	0	0	0	0	0	0	0	0	0	0	ARO:1000001 ! process or component of antibiotic biology or chemistry|ARO:3000000 ! determinant of antibiotic resistance|ARO:3000129 ! beta-lactam resistance gene|ARO:3000001 ! beta-lactamase|ARO:3000078 ! class A beta-lactamase
gi|46092530|ARO_3002573|AAC(6_)-Iae__Pseudomonas_aeruginosa_	0	0	0	0	0	0	0	0	0	0	0	0	0	0	0	0	0	0	0	0	0	0	0	0	0	0	0	0	0	0	0	0	0	0	0	0	0	0	0	0	0	0	0	0	0	0	0	0	ARO:1000001 ! process or component of antibiotic biology or chemistry|ARO:3000000 ! determinant of antibiotic resistance|ARO:3000104 ! aminoglycoside resistance gene|ARO:3000121 ! aminoglycoside acetyltransferase (AAC)|ARO:3000345 ! AAC(6')
gi|461692406|ARO_3003198|rmtH__Klebsiella_pneumoniae_	0	0	0	0	0	0	0	0	0	0	0	0	0	0	0	0	0	0	0	0	0	0	0	0	0	0	0	0	0	0	0	0	0	0	0	0	0	0	0	0	0	0	0	0	0	0	0	0	ARO:1000001 ! process or component of antibiotic biology or chemistry|ARO:3000000 ! determinant of antibiotic resistance|ARO:3000519 ! antibiotic target modifying enzyme|ARO:3000164 ! rRNA methyltransferase conferring antibiotic resistance|ARO:3000857 ! 16S ribosomal RNA methyltransferase
gi|46367058|ARO_3002589|AAC(6_)-Iid__Enterococcus_hirae_	0	0	0	0	0	0	0	0	0	0	0	0	0	0	0	0	0	0	0	0	0	0	0	0	0	0	0	0	0	0	0	0	0	0	0	0	0	0	0	0	0	0	0	0	0	0	0	0	ARO:1000001 ! process or component of antibiotic biology or chemistry|ARO:3000000 ! determinant of antibiotic resistance|ARO:3000104 ! aminoglycoside resistance gene|ARO:3000121 ! aminoglycoside acetyltransferase (AAC)|ARO:3000345 ! AAC(6')
gi|46367060|ARO_3002590|AAC(6_)-Iih__Enterococcus_durans_	0	0	0	0	0	0	0	0	0	0	0	0	0	0	0	0	0	0	0	0	0	0	0	0	0	0	0	0	0	0	0	0	0	0	0	0	0	0	0	0	0	0	0	0	0	0	0	0	ARO:1000001 ! process or component of antibiotic biology or chemistry|ARO:3000000 ! determinant of antibiotic resistance|ARO:3000104 ! aminoglycoside resistance gene|ARO:3000121 ! aminoglycoside acetyltransferase (AAC)|ARO:3000345 ! AAC(6')
gi|46561720|ARO_3001773|OXA-61__Campylobacter_jejuni_	0	0	0	0	0	0	0	0	0	0	0	0	0	0	0	0	0	0	0	0	0	0	0	0	0	0	0	0	0	0	0	0	0	0	0	0	0	0	0	0	0	0	0	0	0	0	0	0	ARO:1000001 ! process or component of antibiotic biology or chemistry|ARO:3000000 ! determinant of antibiotic resistance|ARO:3000129 ! beta-lactam resistance gene|ARO:3000001 ! beta-lactamase|ARO:3000075 ! class D beta-lactamase|ARO:3000017 ! OXA beta-lactamase
gi|466478|ARO_3003250|bcrC__Bacillus_licheniformis_	0	0	0	0	0	0	0	0	0	0	0	0	0	0	0	0	0	0	0	0	0	0	0	0	0	0	0	0	0	0	0	0	0	0	0	0	0	0	0	0	0	0	0	0	0	0	0	0	ARO:1000001 ! process or component of antibiotic biology or chemistry|ARO:3000000 ! determinant of antibiotic resistance|ARO:3000751 ! peptide antibiotic resistance gene|ARO:3003252 ! bacitracin resistance gene|ARO:3003398 ! undecaprenyl pyrophosphate related proteins conferring resistance to bacitracin
gi|46700|ARO_3002828|srmB__Streptomyces_ambofaciens_	0	0	0	0	0	0	0	0	0	0	0	0	0	0	0	0	0	0	0	0	0	0	0	0	0	0	0	0	0	0	0	0	0	0	0	0	0	0	0	0	0	0	0	0	0	0	0	0	ARO:1000001 ! process or component of antibiotic biology or chemistry|ARO:3000000 ! determinant of antibiotic resistance|ARO:3000315 ! macrolide resistance gene|ARO:3000613 ! macrolide resistance efflux pump
gi|467796|ARO_3002995|ROB-1__Mannheimia_haemolytica_	0	0	0	0	0	0	0	0	0	0	0	0	0	0	0	0	0	0	0	0	0	0	0	0	0	0	0	0	0	0	0	0	0	0	0	0	0	0	0	0	0	0	0	0	0	0	0	0	ARO:1000001 ! process or component of antibiotic biology or chemistry|ARO:3000000 ! determinant of antibiotic resistance|ARO:3000129 ! beta-lactam resistance gene|ARO:3000001 ! beta-lactamase|ARO:3000078 ! class A beta-lactamase|ARO:3002994 ! ROB beta-lactamase
gi|47078|ARO_3002638|APH(3__)-Ia__Streptomyces_griseus_	0	0	0	0	0	0	0	0	0	0	0	0	0	0	0	0	0	0	0	0	0	0	0	0	0	0	0	0	0	0	0	0	0	0	0	0	0	0	0	0	0	0	0	0	0	0	0	0	ARO:1000001 ! process or component of antibiotic biology or chemistry|ARO:3000000 ! determinant of antibiotic resistance|ARO:3000557 ! antibiotic inactivation enzyme|ARO:3000114 ! aminoglycoside phosphotransferase (APH)|ARO:3000127 ! APH(3'')
gi|47106|ARO_3002658|APH(6)-Ib__Streptomyces_glaucescens_	0	0	0	0	0	0	0	0	0	0	0	0	0	0	0	0	0	0	0	0	0	0	0	0	0	0	0	0	0	0	0	0	0	0	0	0	0	0	0	0	0	0	0	0	0	0	0	0	ARO:1000001 ! process or component of antibiotic biology or chemistry|ARO:3000000 ! determinant of antibiotic resistance|ARO:3000557 ! antibiotic inactivation enzyme|ARO:3000114 ! aminoglycoside phosphotransferase (APH)|ARO:3000151 ! APH(6)
gi|47160|ARO_3002690|cml__Streptomyces_lividans_1326_	0	0	0	0	0	0	0	0	0	0	0	0	0	0	0	0	0	0.80333	0	0	0	0	0	0	0	1.06868	0	0	0	0	0	0	0	0	0	0	0	0	0	0	0	0	0	0	0	0	0	0	ARO:1000001 ! process or component of antibiotic biology or chemistry|ARO:3000000 ! determinant of antibiotic resistance|ARO:3000159 ! efflux pump conferring antibiotic resistance|ARO:0010002 ! major facilitator superfamily (MFS) antibiotic efflux pump|ARO:3001213 ! chloramphenicol resistance efflux pump
gi|47169667|ARO_3002839|lnuF__Escherichia_coli_	0	0	0	0	0	0	0	0	0	0	0	0	0	0	0	0	0	0	0	0	0	0	0	0	0	0	0	0	0	0	0	0	0	0	0	0	0	0	0	0	0	0	0	0	0	0	0	0	ARO:1000001 ! process or component of antibiotic biology or chemistry|ARO:3000000 ! determinant of antibiotic resistance|ARO:3000241 ! lincosamide resistance gene|ARO:3000221 ! lincosamide nucleotidyltransferase (LIN)
gi|472441783|ARO_3002836|lnuB__Streptococcus_lutetiensis_	0	0	0	0	0	0	0	0	0	0	0	0	6.21326	0	0	0	0	0	0	0	0	0	0	0	0	0	0	0	0	0	0	0	0	0	0	0	0	0	0	0	0	0	0	0	0	0	0	0	ARO:1000001 ! process or component of antibiotic biology or chemistry|ARO:3000000 ! determinant of antibiotic resistance|ARO:3000241 ! lincosamide resistance gene|ARO:3000221 ! lincosamide nucleotidyltransferase (LIN)
gi|47473|ARO_3002891|otrA__Streptomyces_rimosus_	0	0	0	0	0	0	0	0	0	0	0	0	0	0	0	0	0	0	0	0	0	0	0	0	0	0	0	0	0	0	0	0	0	0	0	0	0	0	0	0	0	0	0	0	0	0	0	0	ARO:1000001 ! process or component of antibiotic biology or chemistry|ARO:3000000 ! determinant of antibiotic resistance|ARO:3000185 ! antibiotic target protection protein|ARO:0000002 ! tetracycline resistance ribosomal protection protein
gi|47826688|ARO_3002563|AAC(6_)-Isa__Streptomyces_albulus_	0	0	0	0	0	0	0	0	0	0	0	0	0	0	0	0	0	0	0	0	0	0	0	0	0	0	0	0	0	0	0	0	0	0	0	0	0	0	0	0	0	0	0	0	0	0	0	0	ARO:1000001 ! process or component of antibiotic biology or chemistry|ARO:3000000 ! determinant of antibiotic resistance|ARO:3000104 ! aminoglycoside resistance gene|ARO:3000121 ! aminoglycoside acetyltransferase (AAC)|ARO:3000345 ! AAC(6')
gi|48003|ARO_3003061|viomycin_phosphotransferase__Streptomyces_vinaceus_	0	0	0	0	0	0	0	0	0	0	0	0	0	0	0	0	0	0	0	0	0	0	0	0	0	0	0	0	0	0	0	0	0	0	0	0	0	0	0	0	0	0	0	0	0	0	0	0	ARO:1000001 ! process or component of antibiotic biology or chemistry|ARO:3000000 ! determinant of antibiotic resistance|ARO:3000557 ! antibiotic inactivation enzyme
gi|483941|ARO_3003006|blt__Bacillus_subtilis_subsp__subtilis_str__168_	0	0	0	0	0	0	0	0	0	0	0	0	0	0	0	0	0	0	0	0	0	0	0	0	0	0	0	0	0	0	0	0	0	0	0	0	0	0	0	0	0	0	0	0	0	0	0	0	ARO:1000001 ! process or component of antibiotic biology or chemistry|ARO:3000000 ! determinant of antibiotic resistance|ARO:3000159 ! efflux pump conferring antibiotic resistance|ARO:0010002 ! major facilitator superfamily (MFS) antibiotic efflux pump
gi|48527204|ARO_3000988|TEM-126__Escherichia_coli_	0	0	0	0	0	0	0	0	0	0	0	0	0	0	0	0	0	0	0	0	0	0	0	0	0	0	0	0	0	0	0	0	0	0	0	0	0	0	0	0	0	0	0	0	0	0	0	0	ARO:1000001 ! process or component of antibiotic biology or chemistry|ARO:3000000 ! determinant of antibiotic resistance|ARO:3000129 ! beta-lactam resistance gene|ARO:3000001 ! beta-lactamase|ARO:3000078 ! class A beta-lactamase|ARO:3000014 ! TEM beta-lactamase
gi|485965|ARO_3000380|FosC__Pseudomonas_syringae_	0	0	0	0	0	0	0	0	0	0	0	0	0	0	0	0	0	0	0	0	0	0	0	0	0	0	0	0	0	0	0	0	0	0	0	0	0	0	0	0	0	0	0	0	0	0	0	0	ARO:1000001 ! process or component of antibiotic biology or chemistry|ARO:3000000 ! determinant of antibiotic resistance|ARO:3000271 ! fosfomycin resistance gene|ARO:3000342 ! fosfomycin inactivation enzyme|ARO:3000359 ! fosfomycin phosphotransferase
gi|48727554|ARO_3000300|lsaA__Enterococcus_faecalis_	0	0	0	0	0	0	0	0	0	0	0	0	0	0	0	0	0	0	0	0	0	0	0	0	0	0	0	0	0	0	0	0	0	0	0	0	0	0	0	0	0	0	0	0	0	0	0	0	ARO:1000001 ! process or component of antibiotic biology or chemistry|ARO:3000000 ! determinant of antibiotic resistance|ARO:3000241 ! lincosamide resistance gene|ARO:3002880 ! lincosamide resistance efflux pump
gi|48810|ARO_3002997|LCR-1__Pseudomonas_aeruginosa_	0	0	0	0	0	0	0	0	0	0	0	0	0	0	0	0	0	0	0	0	0	0	0	0	0	0	0	0	0	0	0	0	0	0	0	0	0	0	0	0	0	0	0	0	0	0	0	0	ARO:1000001 ! process or component of antibiotic biology or chemistry|ARO:3000000 ! determinant of antibiotic resistance|ARO:3000129 ! beta-lactam resistance gene|ARO:3000001 ! beta-lactamase|ARO:3000075 ! class D beta-lactamase|ARO:3002996 ! LCR beta-lactamase
gi|48857|ARO_3001400|OXA-5__Pseudomonas_aeruginosa_	0	0	0	0	0	0	0	0	0	0	0	0	0	0	0	0	0	0	0	0	0	0	0	0	0	0	0	0	0	0	0	0	0	0	0	0	0	0	0	0	0	0	0	0	0	0	0	0	ARO:1000001 ! process or component of antibiotic biology or chemistry|ARO:3000000 ! determinant of antibiotic resistance|ARO:3000129 ! beta-lactam resistance gene|ARO:3000001 ! beta-lactamase|ARO:3000075 ! class D beta-lactamase|ARO:3000017 ! OXA beta-lactamase
gi|49263|ARO_3002657|APH(6)-Ia__Streptomyces_griseus_	0	0	0	0	0	0	0	0	0	0	0	0	0	0	0	0	0	0	0	0	0	0	0	0	0	0	0	0	0	0	0	0	0	0	0	0	0	0	0	0	0	0	0	0	0	0	0	0	ARO:1000001 ! process or component of antibiotic biology or chemistry|ARO:3000000 ! determinant of antibiotic resistance|ARO:3000557 ! antibiotic inactivation enzyme|ARO:3000114 ! aminoglycoside phosphotransferase (APH)|ARO:3000151 ! APH(6)
gi|497608|ARO_3003562|TLE_beta-lactamase__Mycobacterium_fortuitum_	0	0	0	0	0	0	0	0	0	0	0	0	0	0	0	0	0	0	0	0	0	0	0	0	0	0	0	0	0	0	0	0	0	0	0	0	0	0	0	0	0	0	0	0	0	0	0	0	ARO:1000001 ! process or component of antibiotic biology or chemistry|ARO:3000000 ! determinant of antibiotic resistance|ARO:3000129 ! beta-lactam resistance gene|ARO:3000001 ! beta-lactamase|ARO:3000078 ! class A beta-lactamase
gi|498236033|ARO_3003071|mphE__Brachybacterium_paraconglomeratum_LC44_	0	0	0	0	0	0	0	0	0	0	0	0	0	0	0	0	0	0	0	0	0	0	0	0	0	0	0	0	0	0	0	0	0	0	0	0	0	0	0	0	0	0	0	0	0	0	0	0	ARO:1000001 ! process or component of antibiotic biology or chemistry|ARO:3000000 ! determinant of antibiotic resistance|ARO:3000557 ! antibiotic inactivation enzyme|ARO:3000201 ! macrolide inactivation enzyme|ARO:3000333 ! macrolide phosphotransferase (MPH)
gi|498887|ARO_3002700|cmlv__Streptomyces_venezuelae_ATCC_10712_	0	0	0	0	0	0	0	0	0	0	0	0	0	0	0	0	0	0	0	0	0	0	0	0	0	0	0	0	0	0	0	0	0	0	0	0	0	0	0	0	0	0	0	0	0	0	0	0	ARO:1000001 ! process or component of antibiotic biology or chemistry|ARO:3000000 ! determinant of antibiotic resistance|ARO:3000398 ! chloramphenicol resistance gene|ARO:3000249 ! chloramphenicol phosphotransferase
gi|5002292|ARO_3003202|TLA-1__Escherichia_coli_	0	0	0	0	0	0	0	0	0	0	0	0	0	0	0	0	0	0	0	0	0	0	0	0	0	0	0	0	0	0	0	0	0	0	0	0	0	0	0	0	0	0	0	0	0	0	0	0	ARO:1000001 ! process or component of antibiotic biology or chemistry|ARO:3000000 ! determinant of antibiotic resistance|ARO:3000129 ! beta-lactam resistance gene|ARO:3000001 ! beta-lactamase|ARO:3000078 ! class A beta-lactamase|ARO:3003201 ! TLA beta-lactamase
gi|5002505|ARO_3002544|AAC(3)-Xa__Streptomyces_griseus_	0	0	0	0	0	0	0	0	0	0	0	0	0	0	0	0	0	0	0	0	0	0	0	0	0	0	0	0	0	0	0	0	0	0	0	0	0	0	0	0	0	0	0	0	0	0	0	0	ARO:1000001 ! process or component of antibiotic biology or chemistry|ARO:3000000 ! determinant of antibiotic resistance|ARO:3000104 ! aminoglycoside resistance gene|ARO:3000121 ! aminoglycoside acetyltransferase (AAC)|ARO:3000322 ! AAC(3)
gi|500363972|ARO_3000318|mphB__Bacillus_cereus_K-5975c_	0	0	0	0	0	0	0	0	0	0	0	0	0	0	0	0	0	0	0	0	0	0	0	0	0	0	0	0	0	0	0	0	0	0	0	0	0	0	0	0	0	0	0	0	0	0	0	0	ARO:1000001 ! process or component of antibiotic biology or chemistry|ARO:3000000 ! determinant of antibiotic resistance|ARO:3000557 ! antibiotic inactivation enzyme|ARO:3000201 ! macrolide inactivation enzyme|ARO:3000333 ! macrolide phosphotransferase (MPH)
gi|507722026|ARO_3002975|vanTN__Enterococcus_faecium_	0	0	0	0	0	0	0	0	0	0	0	0	0	0	0	0	0	0	0	0	0	0	0	0	0	0	0	0	0	0	0	0	0	0	0	0	0	0	0	0	0	0	0	0	0	0	0	0	ARO:1000001 ! process or component of antibiotic biology or chemistry|ARO:3000000 ! determinant of antibiotic resistance|ARO:3000012 ! gene conferring antibiotic resistance via molecular bypass|ARO:3002976 ! gene associated with a glycopeptide resistance cluster|ARO:3000372 ! vanT
gi|50787619|ARO_3003016|dfrA20__Pasteurella_multocida_	0	0	0	0	0	0	0	0	0	0	0	0	0	0	0	0	0	0	0	0	0	0	0	0	0	0	0	0	0	0	0	0	0	0	0	0	0	0	0	0	0	0	0	0	0	0	0	0	ARO:1000001 ! process or component of antibiotic biology or chemistry|ARO:3000000 ! determinant of antibiotic resistance|ARO:3001217 ! trimethoprim resistance gene|ARO:3001218 ! trimethoprim resistant dihydrofolate reductase dfr
gi|50956654|ARO_3003556|SLB-1__Shewanella_livingstonensis_	0	0	0	0	0	0	0	0	0	0	0	0	0	0	0	0	0	0	0	0	0	0	0	0	0	0	0	0	0	0	0	0	0	0	0	0	0	0	0	0	0	0	0	0	0	0	0	0	ARO:1000001 ! process or component of antibiotic biology or chemistry|ARO:3000000 ! determinant of antibiotic resistance|ARO:3000129 ! beta-lactam resistance gene|ARO:3000001 ! beta-lactamase|ARO:3000004 ! class B (metallo-) beta-lactamase|ARO:3000568 ! subclass B1 (metallo-) beta-lactamase|ARO:3003555 ! SHW beta-lactamase
gi|50956656|ARO_3003557|SFB-1__Shewanella_frigidimarina_	0	0	0	0	0	0	0	0	0	0	0	0	0	0	0	0	0	0	0	0	0	0	0	0	0	0	0	0	0	0	0	0	0	0	0	0	0	0	0	0	0	0	0	0	0	0	0	0	ARO:1000001 ! process or component of antibiotic biology or chemistry|ARO:3000000 ! determinant of antibiotic resistance|ARO:3000129 ! beta-lactam resistance gene|ARO:3000001 ! beta-lactamase|ARO:3000004 ! class B (metallo-) beta-lactamase|ARO:3000568 ! subclass B1 (metallo-) beta-lactamase|ARO:3003555 ! SHW beta-lactamase
gi|512512|ARO_3000363|EreB__Escherichia_coli_	0	0	0	0	0	0	0	0	0	0	0	0	0	0	0	0	0	0	0	0	0	0	0	0	0	0	0	0	0	0	0	0	0	0	0	0	0	0	0	0	0	0	0	0	0	0	0	0	ARO:1000001 ! process or component of antibiotic biology or chemistry|ARO:3000000 ! determinant of antibiotic resistance|ARO:3000557 ! antibiotic inactivation enzyme|ARO:3000201 ! macrolide inactivation enzyme|ARO:3000320 ! macrolide esterase
gi|51832349|ARO_3002628|aad(6)__Streptococcus_oralis_	0	0	0	0	0	0	0	0	0	0	0	0	0	0	0	0	0	0	0	0	0	0	0	0	0	0	0	0	0	0	0	0	0	0	0	0	0	0	0	0	0	0	0	0	0	0	0	0	ARO:1000001 ! process or component of antibiotic biology or chemistry|ARO:3000000 ! determinant of antibiotic resistance|ARO:3000104 ! aminoglycoside resistance gene|ARO:3000218 ! aminoglycoside nucleotidyltransferase (ANT)|ARO:3000225 ! ANT(6)
gi|5360860|ARO_3001205|bleomycin_resistance_protein_(BRP)__Staphylococcus_aureus_	0	0	0	0	0	0	0	0	0	0	0	0	0	0	0	0	0	0	0	0	0	0	0	0	0	0	0	0	0	0	0	0	0	0	0	0	0	0	0	0	0	0	0	0	0	0	0	0	ARO:1000001 ! process or component of antibiotic biology or chemistry|ARO:3000000 ! determinant of antibiotic resistance|ARO:3000494 ! glycopeptide resistance gene
gi|53754298|ARO_3002662|APH(9)-Ia__Legionella_pneumophila_str__Lens_	0	0	0	0	0	0	0	0	0	0	0	0	0	0	0	0	0	0	0	0	0	0	0	0	0	0	0	0	0	0	0	0	0	0	0	0	0	0	0	0	0	0	0	0	0	0	0	0	ARO:1000001 ! process or component of antibiotic biology or chemistry|ARO:3000000 ! determinant of antibiotic resistance|ARO:3000557 ! antibiotic inactivation enzyme|ARO:3000114 ! aminoglycoside phosphotransferase (APH)|ARO:3000153 ! APH(9)
gi|540366962|ARO_3002669|APH(2__)-Ig__Campylobacter_coli_CVM_N29710_	0	0	0	0	0	0	0	0	0	0	0	0	0	0	0	0	0	0	0	0	0	0	0	0	0	0	0	0	0	0	0	0	0	0	0	0	0	0	0	0	0	0	0	0	0	0	0	0	ARO:1000001 ! process or component of antibiotic biology or chemistry|ARO:3000000 ! determinant of antibiotic resistance|ARO:3000557 ! antibiotic inactivation enzyme|ARO:3000114 ! aminoglycoside phosphotransferase (APH)|ARO:3000128 ! APH(2'')
gi|540366974|ARO_3002647|APH(3_)-IIIa__Campylobacter_coli_CVM_N29710_	0	0	0	0	0	0	0	0	0	0	0	0	0	0	0	0	0	0	0	0	0	0	0	0	0	0	0	0	0	0	0	0	0	0	0	0	0	0	0	0	0	0	0	0	0	0	0	0	ARO:1000001 ! process or component of antibiotic biology or chemistry|ARO:3000000 ! determinant of antibiotic resistance|ARO:3000557 ! antibiotic inactivation enzyme|ARO:3000114 ! aminoglycoside phosphotransferase (APH)|ARO:3000126 ! APH(3')
gi|541905543|ARO_3000559|adeN__Acinetobacter_baumannii_	0	0	0	0	0	0	0	0	0	0	0	0	0	0	0	0	0	0	0	0	0	0	0	0	0	0	0	0	0	0	0	0	0	0	0	0	0	0	0	0	0	0	0	0	0	0	0	0	ARO:1000001 ! process or component of antibiotic biology or chemistry|ARO:3000000 ! determinant of antibiotic resistance|ARO:3000451 ! gene modulating antibiotic efflux
gi|544207406|ARO_3001517|OXA-329__Acinetobacter_calcoaceticus_	0	0	0	0	0	0	0	0	0	0	0	0	0	0	0	0	0	0	0	0	0	0	0	0	0	0	0	0	0	0	0	0	0	0	0	0	0	0	0	0	0	0	0	0	0	0	0	0	ARO:1000001 ! process or component of antibiotic biology or chemistry|ARO:3000000 ! determinant of antibiotic resistance|ARO:3000129 ! beta-lactam resistance gene|ARO:3000001 ! beta-lactamase|ARO:3000075 ! class D beta-lactamase|ARO:3000017 ! OXA beta-lactamase
gi|545911188|ARO_3002631|spd__Staphylococcus_aureus_	0	0	0	0	0	0	0	0	0	0	0	0	0	0	0	0	0	0	0	0	0	0	0	0	0	0	0	0	0	0	0	0	0	0	0	0	0	0	0	0	0	0	0	0	0	0	0	0	ARO:1000001 ! process or component of antibiotic biology or chemistry|ARO:3000000 ! determinant of antibiotic resistance|ARO:3000104 ! aminoglycoside resistance gene|ARO:3000218 ! aminoglycoside nucleotidyltransferase (ANT)|ARO:3000228 ! ANT(9)
gi|547389|ARO_3002557|AAC(6_)-Ij__Acinetobacter_genomosp__13_	0	0	0	0	0	0	0	0	0	0	0	0	0	0	0	0	0	0	0	0	0	0	0	0	0	0	0	0	0	0	0	0	0	0	0	0	0	0	0	0	0	0	0	0	0	0	0	0	ARO:1000001 ! process or component of antibiotic biology or chemistry|ARO:3000000 ! determinant of antibiotic resistance|ARO:3000104 ! aminoglycoside resistance gene|ARO:3000121 ! aminoglycoside acetyltransferase (AAC)|ARO:3000345 ! AAC(6')
gi|54969626|ARO_3000316|mphA__uncultured_bacterium_	0	0	0	0	0	0	0	0	0	0	0	0	0	0	0	0	0	0	0	0	0	0	0	0	0	0	0	0	0	0	0	0	0	0	0	0	0	0	0	0	0	0	0	0	0	0	0	0	ARO:1000001 ! process or component of antibiotic biology or chemistry|ARO:3000000 ! determinant of antibiotic resistance|ARO:3000557 ! antibiotic inactivation enzyme|ARO:3000201 ! macrolide inactivation enzyme|ARO:3000333 ! macrolide phosphotransferase (MPH)
gi|54969634|ARO_3003203|TLA-2__uncultured_bacterium_	0	0	0	0	0	0	0	0	0	0	0	0	0	0	0	0	0	0	0	0	0	0	0	0	0	0	0	0	0	0	0	0	0	0	0	0	0	0	0	0	0	0	0	0	0	0	0	0	ARO:1000001 ! process or component of antibiotic biology or chemistry|ARO:3000000 ! determinant of antibiotic resistance|ARO:3000129 ! beta-lactam resistance gene|ARO:3000001 ! beta-lactamase|ARO:3000078 ! class A beta-lactamase|ARO:3003201 ! TLA beta-lactamase
gi|55415757|ARO_3003019|dfrA23__Salmonella_enterica_subsp__enterica_serovar_Typhimurium_	0	0	0	0	0	0	0	0	0	0	0	0	0	0	0	0	0	0	0	0	0	0	0	0	0	0	0	0	0	0	0	0	0	0	0	0	0	0	0	0	0	0	0	0	0	0	0	0	ARO:1000001 ! process or component of antibiotic biology or chemistry|ARO:3000000 ! determinant of antibiotic resistance|ARO:3001217 ! trimethoprim resistance gene|ARO:3001218 ! trimethoprim resistant dihydrofolate reductase dfr
gi|556427|ARO_3003036|oleB__Streptomyces_antibioticus_	0	0	0	0	0	0	0	0	0	0	0	0	0	0	0	0	0	0	0	0	0	0	0	0	0	0	0	0	0	0	0	0	0	0	0	0	0	0	0	0	0	0	0	0	0	0	0	0	ARO:1000001 ! process or component of antibiotic biology or chemistry|ARO:3000000 ! determinant of antibiotic resistance|ARO:3000159 ! efflux pump conferring antibiotic resistance|ARO:0010001 ! ATP-binding cassette (ABC) antibiotic efflux pump
gi|557879501|ARO_3002948|vanHO__Rhodococcus_equi_	0	0	0	0	0	0	0	0	0	0	0	0	0	0	0	0	0	0	0	0	0	0	0	0	0	0	0	0	0	0	0	0	0	0	0	0	0	0	0	0	0	0	0	0	0	0	0	0	ARO:1000001 ! process or component of antibiotic biology or chemistry|ARO:3000000 ! determinant of antibiotic resistance|ARO:3000012 ! gene conferring antibiotic resistance via molecular bypass|ARO:3002976 ! gene associated with a glycopeptide resistance cluster|ARO:3000006 ! vanH
gi|557879502|ARO_3002913|vanO__Rhodococcus_equi_	0	0	0	0	0	0	0	0	0	0	0	0	0	0	0	0	0	0	0	0	0	0	0	0	0	0	0	0	0	0	0	0	0	0	0	0	0	0	0	0	0	0	0	0	0	0	0	0	ARO:1000001 ! process or component of antibiotic biology or chemistry|ARO:3000000 ! determinant of antibiotic resistance|ARO:3000012 ! gene conferring antibiotic resistance via molecular bypass|ARO:3002976 ! gene associated with a glycopeptide resistance cluster|ARO:3002906 ! van ligase|ARO:3002978 ! D-Ala-D-Lac ligase
gi|557879503|ARO_3002954|vanXO__Rhodococcus_equi_	0	0	0	0	0	0	0	0	0	0	0	0	0	0	0	0	0	0	0	0	0	0	0	0	0	0	0	0	0	0	0	0	0	0	0	0	0	0	0	0	0	0	0	0	0	0	0	0	ARO:1000001 ! process or component of antibiotic biology or chemistry|ARO:3000000 ! determinant of antibiotic resistance|ARO:3000012 ! gene conferring antibiotic resistance via molecular bypass|ARO:3002976 ! gene associated with a glycopeptide resistance cluster|ARO:3000011 ! vanX
gi|557879506|ARO_3002941|vanSO__Rhodococcus_equi_	0	0	0	0	0	0	0	0	0	0	0	0	0	0	0	0	0	0	0	0	0	0	0	0	0	0	0	0	0	0	0	0	0	0	0	0	0	0	0	0	0	0	0	0	0	0	0	0	ARO:1000001 ! process or component of antibiotic biology or chemistry|ARO:3000000 ! determinant of antibiotic resistance|ARO:3000012 ! gene conferring antibiotic resistance via molecular bypass|ARO:3002976 ! gene associated with a glycopeptide resistance cluster|ARO:3002905 ! VanS-VanR two-component regulatory system|ARO:3000071 ! vanS
gi|557879507|ARO_3002930|vanRO__Rhodococcus_equi_	0	0	0	0	0	0	0	3.76243	0	0	1.94121	0	0	0	0	2.45292	1.60582	0	0	0	0	0	0	0	0	0	0	0	1.64083	0	0	0	0	0	0	0	0	0	2.30909	0	0	0	0	0	0	0	0	0	ARO:1000001 ! process or component of antibiotic biology or chemistry|ARO:3000000 ! determinant of antibiotic resistance|ARO:3000012 ! gene conferring antibiotic resistance via molecular bypass|ARO:3002976 ! gene associated with a glycopeptide resistance cluster|ARO:3002905 ! VanS-VanR two-component regulatory system|ARO:3000574 ! vanR
gi|558754899|ARO_3001557|OXA-371__Acinetobacter_baumannii_	0	0	0	0	0	0	0	0	0	0	0	0	0	0	0	0	0	0	0	0	0	0	0	0	0	0	0	0	0	0	0	0	0	0	0	0	0	0	0	0	0	0	0	0	0	0	0	0	ARO:1000001 ! process or component of antibiotic biology or chemistry|ARO:3000000 ! determinant of antibiotic resistance|ARO:3000129 ! beta-lactam resistance gene|ARO:3000001 ! beta-lactamase|ARO:3000075 ! class D beta-lactamase|ARO:3000017 ! OXA beta-lactamase
gi|56159281|ARO_3000565|tet38__Staphylococcus_aureus_	0	0	0	0	0	0	0	0	0	0	0	0	0	0	0	0	0	0	0	0	0	0	0	0	0	0	0	0	0	0	0	0	0	0	0	0	0	0	0	0	0	0	0	0	0	0	0	0	ARO:1000001 ! process or component of antibiotic biology or chemistry|ARO:3000000 ! determinant of antibiotic resistance|ARO:3000159 ! efflux pump conferring antibiotic resistance|ARO:0010002 ! major facilitator superfamily (MFS) antibiotic efflux pump
gi|56385100|ARO_3000533|macA__Neisseria_gonorrhoeae_	0	0	0	0	0	0	0	0	0	0	0	0	0	0	0	0	0	0	0	0	0	0	0	0	0	0	0	0	0	0	0	0	0	0	0	0	0	0	0	0	0	0	0	0	0	0	0	0	ARO:1000001 ! process or component of antibiotic biology or chemistry|ARO:3000000 ! determinant of antibiotic resistance|ARO:3000159 ! efflux pump conferring antibiotic resistance|ARO:3000748 ! subunit of efflux pump conferring antibiotic resistance
gi|56385102|ARO_3000535|macB__Neisseria_gonorrhoeae_	0	0	0	0	0	0	0	0	0	0	0	0	0	0	0	0	0	0	0	0	0	0	0	0	0	0	0	0	0	0	0	0	0	0	0	0	0	0	0	0	0	0	0	0	0	0	0	0	ARO:1000001 ! process or component of antibiotic biology or chemistry|ARO:3000000 ! determinant of antibiotic resistance|ARO:3000159 ! efflux pump conferring antibiotic resistance|ARO:3000748 ! subunit of efflux pump conferring antibiotic resistance
gi|565411207|ARO_3003199|AAC(6_)-Iak__Stenotrophomonas_maltophilia_	0	0	0	0	0	0	0	1.30867	0	0	0	0	0	0	0	0	1.67564	1.67651	0	0	0	0	0	0	0	0	0	0	0	0	0	0	0	0	0	0	1.05637	2.83206	2.40949	0	0	0	0	0	0	0	0	3.7311	ARO:1000001 ! process or component of antibiotic biology or chemistry|ARO:3000000 ! determinant of antibiotic resistance|ARO:3000104 ! aminoglycoside resistance gene|ARO:3000121 ! aminoglycoside acetyltransferase (AAC)|ARO:3000345 ! AAC(6')
gi|5670199|ARO_3002596|AAC(6_)-IIc__Pseudomonas_aeruginosa_	0	0	0	0	0	0	0	0	0	0	0	0	0	0	0	0	0	0	0	0	0	0	0	0	0	0	0	0	0	0	0	0	0	0	0	0	0	0	0	0	0	0	0	0	0	0	0	0	ARO:1000001 ! process or component of antibiotic biology or chemistry|ARO:3000000 ! determinant of antibiotic resistance|ARO:3000104 ! aminoglycoside resistance gene|ARO:3000121 ! aminoglycoside acetyltransferase (AAC)|ARO:3000345 ! AAC(6')
gi|56962848|ARO_3002816|clbC__Bacillus_clausii_KSM-K16_	0	0	0	0	0	0	0	0	0	0	0	0	0	0	0	0	0	0	0	0	0	0	0	0	0	0	0	0	0	0	0	0	0	0	0	0	0	0	0	0	0	0	0	0	0	0	0	0	ARO:1000001 ! process or component of antibiotic biology or chemistry|ARO:3000000 ! determinant of antibiotic resistance|ARO:3000052 ! phenicol resistance gene|ARO:3000202 ! Cfr 23S ribosomal RNA methyltransferase
gi|571046704|ARO_3002626|ANT(6)-Ia__Exiguobacterium_sp__S3-2_	0	0	0	0	0	0	0	0	0	0	0	0	0	0	0	0	0	0	0	0	0	0	0	0	0	0	0	0	0	0	0	0	0	0	0	0	0	0	0	0	0	0	0	0	0	0	0	0	ARO:1000001 ! process or component of antibiotic biology or chemistry|ARO:3000000 ! determinant of antibiotic resistance|ARO:3000104 ! aminoglycoside resistance gene|ARO:3000218 ! aminoglycoside nucleotidyltransferase (ANT)|ARO:3000225 ! ANT(6)
gi|571046708|ARO_3000615|mefA__Exiguobacterium_sp__S3-2_	0	0	0	0	0	0	0	0	0	3.68349	0	0	6.75355	0	0	0	0	0	0	4.65176	0	0	0	0	0	0	0	0	0	0	0	0	0	0	0	0	0	0	0	3.08794	0	0	0	0	0	0	0	0	ARO:1000001 ! process or component of antibiotic biology or chemistry|ARO:3000000 ! determinant of antibiotic resistance|ARO:3000159 ! efflux pump conferring antibiotic resistance|ARO:0010002 ! major facilitator superfamily (MFS) antibiotic efflux pump|ARO:3000747 ! mef
gi|575501847|ARO_3003011|dfrA10__Klebsiella_pneumoniae_	0	0	0	0	0	0	0	0	0	0	0	0	0	0	0	0	0	0	0	0	0	0	0	0	0	0	0	0	0	0	0	0	0	0	0	0	0	0	0	0	0	0	0	0	0	0	0	0	ARO:1000001 ! process or component of antibiotic biology or chemistry|ARO:3000000 ! determinant of antibiotic resistance|ARO:3001217 ! trimethoprim resistance gene|ARO:3001218 ! trimethoprim resistant dihydrofolate reductase dfr
gi|5764624|ARO_3003051|smeA__Stenotrophomonas_maltophilia_	0	0	0	0	0	0	0	0	0	0	0	0	0	0	0	0	0	0	0	0	0	0	0	0	0	0	0	0	0	0	0	0	0	0	0	0	0	0	0	0	0	0	0	0	0	0	0	0	ARO:1000001 ! process or component of antibiotic biology or chemistry|ARO:3000000 ! determinant of antibiotic resistance|ARO:3000159 ! efflux pump conferring antibiotic resistance|ARO:3000748 ! subunit of efflux pump conferring antibiotic resistance
gi|5764625|ARO_3003052|smeB__Stenotrophomonas_maltophilia_	0	0	0	0	0	0	0	0	0	0	0	0	0	0	0	0	0	0	0	0	0	0	0	0	0	0	0	0	0	0	0	0	0	0	0	0	0	0	0	0	0	0	0	0	0	0	0	0	ARO:1000001 ! process or component of antibiotic biology or chemistry|ARO:3000000 ! determinant of antibiotic resistance|ARO:3000159 ! efflux pump conferring antibiotic resistance|ARO:3000748 ! subunit of efflux pump conferring antibiotic resistance
gi|5764626|ARO_3003053|smeC__Stenotrophomonas_maltophilia_	0	0	0	0	0	0	0	0	0	0	0	0	0	0	0	0	0	0	0	0	0	0	0	0	0	0	0	0	0	0	0	0	0	0	0	0	0	0	0	0	0	0	0	0	0	0	0	0	ARO:1000001 ! process or component of antibiotic biology or chemistry|ARO:3000000 ! determinant of antibiotic resistance|ARO:3000159 ! efflux pump conferring antibiotic resistance|ARO:3000748 ! subunit of efflux pump conferring antibiotic resistance
gi|5764627|ARO_3003067|smeS__Stenotrophomonas_maltophilia_	0	0	0	0	0	0	0	0	0	0	0	0	0	0	0	0	0	0	0	0	0	0	0	0	0	0	0	0	0	0	0	0	0	0	0	0	0	0	0	0	0	0	0	0	0	0	0	0	ARO:1000001 ! process or component of antibiotic biology or chemistry|ARO:3000000 ! determinant of antibiotic resistance|ARO:3000451 ! gene modulating antibiotic efflux|ARO:3000750 ! subunit of gene modulating antibiotic efflux
gi|5764628|ARO_3003066|smeR__Stenotrophomonas_maltophilia_	0	0	0	0	0	0	0	0	0	0	0	0	0	0	0	0	0	0	0	0	0	0	0	0	0	0	0	0	0	0	0	0	0	0	0	0	0	0	0	0	0	0	0	0	0	0	0	0	ARO:1000001 ! process or component of antibiotic biology or chemistry|ARO:3000000 ! determinant of antibiotic resistance|ARO:3000451 ! gene modulating antibiotic efflux|ARO:3000750 ! subunit of gene modulating antibiotic efflux
gi|57652085|ARO_3000489|sav1866__Staphylococcus_aureus_subsp__aureus_COL_	0	0	0	0	0	0	0	0	0	0	0	0	0	0	0	0	0	0	0	0	0	0	0	0	0	0	0	0	0	0	0	0	0	0	0	0	0	0	0	0	0	0	0	0	0	0	0	0	ARO:1000001 ! process or component of antibiotic biology or chemistry|ARO:3000000 ! determinant of antibiotic resistance|ARO:3000159 ! efflux pump conferring antibiotic resistance|ARO:0010001 ! ATP-binding cassette (ABC) antibiotic efflux pump
gi|577698902|ARO_3000013|vanB__Enterococcus_faecium_	0	0	0	0	0	0	0	0	0	0	0	0	0	0	0	0	0	0	0	0	0	0	0	0	0	0	0	0	0	0	0	0	0	0	0	0	0	0	0	0	0	0	0	0	0	0	0	0	ARO:1000001 ! process or component of antibiotic biology or chemistry|ARO:3000000 ! determinant of antibiotic resistance|ARO:3000012 ! gene conferring antibiotic resistance via molecular bypass|ARO:3002976 ! gene associated with a glycopeptide resistance cluster|ARO:3002906 ! van ligase|ARO:3002978 ! D-Ala-D-Lac ligase
gi|577698904|ARO_3002921|vanRB__Enterococcus_faecium_	0	0	0	0	0	0	0	0	0	0	0	0	0	0	0	0	0	0	0	0	0	0	0	0	0	0	0	0	0	0	0	0	0	0	0	0	0	0	0	0	0	0	0	0	0	0	0	0	ARO:1000001 ! process or component of antibiotic biology or chemistry|ARO:3000000 ! determinant of antibiotic resistance|ARO:3000012 ! gene conferring antibiotic resistance via molecular bypass|ARO:3002976 ! gene associated with a glycopeptide resistance cluster|ARO:3002905 ! VanS-VanR two-component regulatory system|ARO:3000574 ! vanR
gi|577698905|ARO_3002932|vanSB__Enterococcus_faecium_	0	0	0	0	0	0	0	0	0	0	0	0	0	0	0	0	0	0	0	0	0	0	0	0	0	0	0	0	0	0	0	0	0	0	0	0	0	0	0	0	0	0	0	0	0	0	0	0	ARO:1000001 ! process or component of antibiotic biology or chemistry|ARO:3000000 ! determinant of antibiotic resistance|ARO:3000012 ! gene conferring antibiotic resistance via molecular bypass|ARO:3002976 ! gene associated with a glycopeptide resistance cluster|ARO:3002905 ! VanS-VanR two-component regulatory system|ARO:3000071 ! vanS
gi|577698906|ARO_3002964|vanWB__Enterococcus_faecium_	0	0	0	0	0	0	0	0	0	0	0	0	0	0	0	0	0	0	0	0	0	0	0	0	0	0	0	0	0	0	0	0	0	0	0	0	0	0	0	0	0	0	0	0	0	0	0	0	ARO:1000001 ! process or component of antibiotic biology or chemistry|ARO:3000000 ! determinant of antibiotic resistance|ARO:3000012 ! gene conferring antibiotic resistance via molecular bypass|ARO:3002976 ! gene associated with a glycopeptide resistance cluster|ARO:3000002 ! vanW
gi|581504|ARO_3002701|cmr__Rhodococcus_fascians_	0	0	0	0	0	0	0	0	0	0	0	0	0	0	0	0	0	0	0	0	0	0	0	0	0	0	0	0	0	0	0	0	0	0	0	0	0	0	0	0	0	0	0	0	0	0	0	0	ARO:1000001 ! process or component of antibiotic biology or chemistry|ARO:3000000 ! determinant of antibiotic resistance|ARO:3000159 ! efflux pump conferring antibiotic resistance|ARO:0010002 ! major facilitator superfamily (MFS) antibiotic efflux pump|ARO:3001213 ! chloramphenicol resistance efflux pump
gi|581682|ARO_3002661|APH(7__)-Ia__Streptomyces_hygroscopicus_	0	0	0	0	0	0	0	0	0	0	0	0	0	0	0	0	0	0	0	0	0	0	0	0	0	0	0	0	0	0	0	0	0	0	0	0	0	0	0	0	0	0	0	0	0	0	0	0	ARO:1000001 ! process or component of antibiotic biology or chemistry|ARO:3000000 ! determinant of antibiotic resistance|ARO:3000557 ! antibiotic inactivation enzyme|ARO:3000114 ! aminoglycoside phosphotransferase (APH)|ARO:3000154 ! APH(7'')
gi|581701|ARO_3001305|ErmU__Streptomyces_lincolnensis_	0	0	0	0	0	0	0	0	0	0	0	0	0	0	0	0	0	0	0	0	0	0	0	0	0	0	0	0	0	0	0	0	0	0	0	0	0	0	0	0	0	0	0	0	0	0	0	0	ARO:1000001 ! process or component of antibiotic biology or chemistry|ARO:3000000 ! determinant of antibiotic resistance|ARO:3000315 ! macrolide resistance gene|ARO:3000560 ! Erm 23S ribosomal RNA methyltransferase
gi|58200479|ARO_3000566|tet39__Acinetobacter_sp__LUH5605_	0	0	0	0	0	0	0	0	0	0	0	0	0	0	0	0	0	0	0	0	0	0	0	0	0	0	0	0	0	0	0	0	0	0	0	0	0	0	0	0	0	0	0	0	0	0	0	0	ARO:1000001 ! process or component of antibiotic biology or chemistry|ARO:3000000 ! determinant of antibiotic resistance|ARO:3000472 ! tetracycline resistance gene|ARO:3000239 ! tetracycline resistance efflux pump
gi|584473063|ARO_3003186|CARB-23__Vibrio_parahaemolyticus_UCM-V493_	0	0	0	0	0	0	0	0	0	0	0	0	0	0	0	0	0	0	0	0	0	0	0	0	0	0	0	0	0	0	0	0	0	0	0	0	0	0	0	0	0	0	0	0	0	0	0	0	ARO:1000001 ! process or component of antibiotic biology or chemistry|ARO:3000000 ! determinant of antibiotic resistance|ARO:3000129 ! beta-lactam resistance gene|ARO:3000001 ! beta-lactamase|ARO:3000078 ! class A beta-lactamase|ARO:3000091 ! CARB beta-lactamase
gi|6016010|ARO_3000193|tetT__Streptococcus_pyogenes_	0	0	0	0	0	0	0	0	0	0	0	0	0	0	0	0	0	0	0	0	0	0	0	0	0	0	0	0	0	0	0	0	0	0	0	0	0	0	0	0	0	0	0	0	0	0	0	0	ARO:1000001 ! process or component of antibiotic biology or chemistry|ARO:3000000 ! determinant of antibiotic resistance|ARO:3000185 ! antibiotic target protection protein|ARO:0000002 ! tetracycline resistance ribosomal protection protein
gi|60207557|ARO_3000781|adeJ__Acinetobacter_baumannii_	0	0	0	0	0	0	0	0	0	0	0	0	0	0	0	0	0	0	0	0	0	0	0	0	0	0	0	0	0	0	0	0	0	0	0	0	0	0	0	0	0	0	0	0	0	0	0	0	ARO:1000001 ! process or component of antibiotic biology or chemistry|ARO:3000000 ! determinant of antibiotic resistance|ARO:3000159 ! efflux pump conferring antibiotic resistance|ARO:3000748 ! subunit of efflux pump conferring antibiotic resistance
gi|60207558|ARO_3000782|adeK__Acinetobacter_baumannii_	0	0	0	0	0	0	0	0	0	0	0	0	0	0	0	0	0	0	0	0	0	0	0	0	0	0	0	0	0	0	0	0	0	0	0	0	0	0	0	0	0	0	0	0	0	0	0	0	ARO:1000001 ! process or component of antibiotic biology or chemistry|ARO:3000000 ! determinant of antibiotic resistance|ARO:3000159 ! efflux pump conferring antibiotic resistance|ARO:3000748 ! subunit of efflux pump conferring antibiotic resistance
gi|60219175|ARO_3002614|aadA14__Pasteurella_multocida_	0	0	0	0	0	0	0	0	0	0	0	0	0	0	0	0	0	0	0	0	0	0	0	0	0	0	0	0	0	0	0	0	0	0	0	0	0	0	0	0	0	0	0	0	0	0	0	0	ARO:1000001 ! process or component of antibiotic biology or chemistry|ARO:3000000 ! determinant of antibiotic resistance|ARO:3000104 ! aminoglycoside resistance gene|ARO:3000218 ! aminoglycoside nucleotidyltransferase (ANT)|ARO:3000232 ! ANT(3'')-Ia
gi|60416719|ARO_3002415|OXY-6-3__Klebsiella_oxytoca_	0	0	0	0	0	0	0	0	0	0	0	0	0	0	0	0	0	0	0	0	0	0	0	0	0	0	0	0	0	0	0	0	0	0	0	0	0	0	0	0	0	0	0	0	0	0	0	0	ARO:1000001 ! process or component of antibiotic biology or chemistry|ARO:3000000 ! determinant of antibiotic resistance|ARO:3000129 ! beta-lactam resistance gene|ARO:3000001 ! beta-lactamase|ARO:3000078 ! class A beta-lactamase|ARO:3002388 ! OXY beta-lactamase
gi|604633363|ARO_3002863|dfrA8__Salmonella_enterica_subsp__enterica_serovar_Typhimurium_	0	0	0	0	0	0	0	0	0	0	0	0	0	0	0	0	0	0	0	0	0	0	0	0	0	0	0	0	0	0	0	0	0	0	0	0	0	0	0	0	0	0	0	0	0	0	0	0	ARO:1000001 ! process or component of antibiotic biology or chemistry|ARO:3000000 ! determinant of antibiotic resistance|ARO:3001217 ! trimethoprim resistance gene|ARO:3001218 ! trimethoprim resistant dihydrofolate reductase dfr
gi|606240878|ARO_3002858|dfrA12__Klebsiella_pneumoniae_subsp__pneumoniae_	0	0	0	0	0	0	0	0	0	0	0	0	0	0	0	0	0	0	0	0	0	0	0	0	0	0	0	0	0	0	0	0	0	0	0	0	0	0	0	0	0	0	0	0	0	0	0	0	ARO:1000001 ! process or component of antibiotic biology or chemistry|ARO:3000000 ! determinant of antibiotic resistance|ARO:3001217 ! trimethoprim resistance gene|ARO:3001218 ! trimethoprim resistant dihydrofolate reductase dfr
gi|606839|ARO_3002991|AER-14__Aeromonas_sobria_	0	0	0	0	0	0	0	0	0	0	0	0	0	0	0	0	0	0	0	0	0	0	0	0	0	0	0	0	0	0	0	0	0	0	0	0	0	0	0	0	0	0	0	0	0	0	0	0	ARO:1000001 ! process or component of antibiotic biology or chemistry|ARO:3000000 ! determinant of antibiotic resistance|ARO:3000129 ! beta-lactam resistance gene|ARO:3000001 ! beta-lactamase|ARO:3000078 ! class A beta-lactamase|ARO:3000089 ! AER beta-lactamase
gi|606841|ARO_3001407|OXA-12__Aeromonas_sobria_	0	0	0	0	0	0	0	0	0	0	0	0	0	0	0	0	0	0	0	0	0	0	0	0	0	0	0	0	0	0	0	0	0	0	0	0	0	0	0	0	0	0	0	0	0	0	0	0	ARO:1000001 ! process or component of antibiotic biology or chemistry|ARO:3000000 ! determinant of antibiotic resistance|ARO:3000129 ! beta-lactam resistance gene|ARO:3000001 ! beta-lactamase|ARO:3000075 ! class D beta-lactamase|ARO:3000017 ! OXA beta-lactamase
gi|6102604|ARO_3002569|AAC(6_)-Iy__Salmonella_enterica_subsp__enterica_serovar_Enteritidis_	0	0	0	0	0	0	0	0	0	0	0	0	0	0	0	0	0	0	0	0	0	0	0	0	0	0	0	0	0	0	0	0	0	0	0	0	0	0	0	0	0	0	0	0	0	0	0	0	ARO:1000001 ! process or component of antibiotic biology or chemistry|ARO:3000000 ! determinant of antibiotic resistance|ARO:3000104 ! aminoglycoside resistance gene|ARO:3000121 ! aminoglycoside acetyltransferase (AAC)|ARO:3000345 ! AAC(6')
gi|61104771|ARO_3002634|APH(2__)-Ie__Enterococcus_casseliflavus_	0	0	0	0	0	0	0	0	0	0	0	0	0	0	0	0	0	0	0	0	0	0	0	0	0	0	0	0	0	0	0	0	0	0	0	0	0	0	0	0	0	0	0	0	0	0	0	0	ARO:1000001 ! process or component of antibiotic biology or chemistry|ARO:3000000 ! determinant of antibiotic resistance|ARO:3000557 ! antibiotic inactivation enzyme|ARO:3000114 ! aminoglycoside phosphotransferase (APH)|ARO:3000128 ! APH(2'')
gi|6164597|ARO_3000850|GOB-1_beta-lactamase__Elizabethkingia_meningoseptica_	0	0	0	0	0	0	0	0	0	0	0	0	0	0	0	0	0	0	0	0	0	0	0	0	0	0	0	0	0	0	0	0	0	0	0	0	0	0	0	0	0	0	0	0	0	0	0	0	ARO:1000001 ! process or component of antibiotic biology or chemistry|ARO:3000000 ! determinant of antibiotic resistance|ARO:3000129 ! beta-lactam resistance gene|ARO:3000001 ! beta-lactamase|ARO:3000004 ! class B (metallo-) beta-lactamase|ARO:3000571 ! subclass B3 (metallo-) beta-lactamase
gi|61744055|ARO_3003558|y56_beta-lactamase__Yersinia_enterocolitica_	0	0	0	0	0	0	0	0	0	0	0	0	0	0	0	0	0	0	0	0	0	0	0	0	0	0	0	0	0	0	0	0	0	0	0	0	0	0	0	0	0	0	0	0	0	0	0	0	ARO:1000001 ! process or component of antibiotic biology or chemistry|ARO:3000000 ! determinant of antibiotic resistance|ARO:3000129 ! beta-lactam resistance gene|ARO:3000001 ! beta-lactamase|ARO:3000078 ! class A beta-lactamase
gi|619498655|ARO_3002789|QnrD2__Salmonella_enterica_subsp__enterica_serovar_Hadar_	0	0	0	0	0	0	0	0	0	0	0	0	0	0	0	0	0	0	0	0	0	0	0	0	0	0	0	0	0	0	0	0	0	0	0	0	0	0	0	0	0	0	0	0	0	0	0	0	ARO:1000001 ! process or component of antibiotic biology or chemistry|ARO:3000000 ! determinant of antibiotic resistance|ARO:3000102 ! fluoroquinolone resistance gene|ARO:3000419 ! fluoroquinolone resistance protein
gi|6224590|ARO_3000326|ErmE__Saccharopolyspora_erythraea_NRRL_2338_	0	0	0	0	0	0	0	0	0	0	0	0	0	0	0	0	0	0	0	0	0	0	0	0	0	0	0	0	0	0	0	0	0	0	0	0	0	0	0	0	0	0	0	0	0	0	0	0	ARO:1000001 ! process or component of antibiotic biology or chemistry|ARO:3000000 ! determinant of antibiotic resistance|ARO:3000315 ! macrolide resistance gene|ARO:3000560 ! Erm 23S ribosomal RNA methyltransferase
gi|62485069|ARO_3002895|sat-1__Escherichia_coli_	0	0	0	0	0	0	0	0	0	0	0	0	0	0	0	0	0	0	0	0	0	0	0	0	0	0	0	0	0	0	0	0	0	0	0	0	0	0	0	0	0	0	0	0	0	0	0	0	ARO:1000001 ! process or component of antibiotic biology or chemistry|ARO:3000000 ! determinant of antibiotic resistance|ARO:3000868 ! streptothricin resistance gene|ARO:3000869 ! streptothricin acetyltransferase (sat)
gi|63099840|ARO_3002837|lnuC__Streptococcus_agalactiae_	0	0	0	0	0	0	0	0	0	0	0	0	0	0	0	0	0	0	0	0	0	0	0	0	0	0	0	0	0	0	0	0	0	0	0	0	0	0	0	0	0	0	0	0	0	0	0	0	ARO:1000001 ! process or component of antibiotic biology or chemistry|ARO:3000000 ! determinant of antibiotic resistance|ARO:3000241 ! lincosamide resistance gene|ARO:3000221 ! lincosamide nucleotidyltransferase (LIN)
gi|633259733|ARO_3000785|cmeC__Campylobacter_jejuni_subsp__jejuni_	0	0	0	0	0	0	0	0	0	0	0	0	0	0	0	0	0	0	0	0	0	0	0	0	0	0	0	0	0	0	0	0	0	0	0	0	0	0	0	0	0	0	0	0	0	0	0	0	ARO:1000001 ! process or component of antibiotic biology or chemistry|ARO:3000000 ! determinant of antibiotic resistance|ARO:3000159 ! efflux pump conferring antibiotic resistance|ARO:3000748 ! subunit of efflux pump conferring antibiotic resistance
gi|633896496|ARO_3003207|FosK__Acinetobacter_soli_	0	0	0	0	0	0	0	0	0	0	0	0	0	0	0	0	0	0	0	0	0	0	0	0	0	0	0	0	0	0	0	0	0	0	0	0	0	0	0	0	0	0	0	0	0	0	0	0	ARO:1000001 ! process or component of antibiotic biology or chemistry|ARO:3000000 ! determinant of antibiotic resistance|ARO:3000271 ! fosfomycin resistance gene|ARO:3000342 ! fosfomycin inactivation enzyme|ARO:3000133 ! fosfomycin thiol transferase
gi|636629761|ARO_3000444|rifampin_phosphotransferase__Streptomyces_sp__WAC4747_	0	0	0	0	0	0	0	0	0	0	0	0	0	0	0	0	0	0	0	0	0	0	0	0	0	0	0	0	0	0	0	0	0	0	0	0	0	0	0	0	0	0	0	0	0	0	0	0	ARO:1000001 ! process or component of antibiotic biology or chemistry|ARO:3000000 ! determinant of antibiotic resistance|ARO:3000383 ! rifampin resistance gene|ARO:3000576 ! rifampin inactivation enzyme
gi|641398830|ARO_3001396|OXA-1__Pseudomonas_aeruginosa_	0	0	0	0	0	0	0	0	0	0	0	0	0	0	0	0	0	0	0	0	0	0	0	0	0	0	0	0	0	0	0	0	0	0	0	0	0	0	0	0	0	0	0	0	0	0	0	0	ARO:1000001 ! process or component of antibiotic biology or chemistry|ARO:3000000 ! determinant of antibiotic resistance|ARO:3000129 ! beta-lactam resistance gene|ARO:3000001 ! beta-lactamase|ARO:3000075 ! class D beta-lactamase|ARO:3000017 ! OXA beta-lactamase
gi|6456729|ARO_3000849|Sfh-1__Serratia_fonticola_	0	0	0	0	0	0	0	0	0	0	0	0	0	0	0	0	0	0	0	0	0	0	0	0	0	0	0	0	0	0	0	0	0	0	0	0	0	0	0	0	0	0	0	0	0	0	0	0	ARO:1000001 ! process or component of antibiotic biology or chemistry|ARO:3000000 ! determinant of antibiotic resistance|ARO:3000129 ! beta-lactam resistance gene|ARO:3000001 ! beta-lactamase|ARO:3000004 ! class B (metallo-) beta-lactamase|ARO:3000570 ! subclass B2 (metallo-) beta-lactamase
gi|66864118|ARO_3000753|abeM__Acinetobacter_baumannii_	0	0	0	0	0	0	0	0	0	0	0	0	0	1.51772	0	0	0	6.16957	0	0	0	0	0	0	0	0	0	0	0	0	0	0	0	0	0	0	0	0	0	0	0	0	0	0	0	0	0	0	ARO:1000001 ! process or component of antibiotic biology or chemistry|ARO:3000000 ! determinant of antibiotic resistance|ARO:3000159 ! efflux pump conferring antibiotic resistance|ARO:3000112 ! multidrug and toxic compound extrusion (MATE) transporter
gi|669115|ARO_3002898|sat-3__Escherichia_coli_	0	0	0	0	0	0	0	0	0	0	0	0	0	0	0	0	0	0	0	0	0	0	0	0	0	0	0	0	0	0	0	0	0	0	0	0	0	0	0	0	0	0	0	0	0	0	0	0	ARO:1000001 ! process or component of antibiotic biology or chemistry|ARO:3000000 ! determinant of antibiotic resistance|ARO:3000868 ! streptothricin resistance gene|ARO:3000869 ! streptothricin acetyltransferase (sat)
gi|674651381|ARO_3002008|CTX-M-151__Salmonella_enterica_	0	0	0	0	0	0	0	0	0	0	0	0	0	0	0	0	0	0	0	0	0	0	0	0	0	0	0	0	0	0	0	0	0	0	0	0	0	0	0	0	0	0	0	0	0	0	0	0	ARO:1000001 ! process or component of antibiotic biology or chemistry|ARO:3000000 ! determinant of antibiotic resistance|ARO:3000129 ! beta-lactam resistance gene|ARO:3000001 ! beta-lactamase|ARO:3000078 ! class A beta-lactamase|ARO:3000016 ! CTX-M beta-lactamase
gi|693581979|ARO_3001855|ACT-35__Enterobacter_cloacae_	0	0	0	0	0	0	0	0	0	0	0	0	0	0	0	0	0	0	0	0	0	0	0	0	0	0	0	0	0	0	0	0	0	0	0	0	0	0	0	0	0	0	0	0	0	0	0	0	ARO:1000001 ! process or component of antibiotic biology or chemistry|ARO:3000000 ! determinant of antibiotic resistance|ARO:3000129 ! beta-lactam resistance gene|ARO:3000001 ! beta-lactamase|ARO:3000076 ! class C beta-lactamase|ARO:3000072 ! ACT beta-lactamase
gi|694179058|ARO_3003163|CTX-M-155__Klebsiella_pneumoniae_	0	0	0	0	0	0	0	0	0	0	0	0	0	0	0	0	0	0	0	0	0	0	0	0	0	0	0	0	0	0	0	0	0	0	0	0	0	0	0	0	0	0	0	0	0	0	0	0	ARO:1000001 ! process or component of antibiotic biology or chemistry|ARO:3000000 ! determinant of antibiotic resistance|ARO:3000129 ! beta-lactam resistance gene|ARO:3000001 ! beta-lactamase|ARO:3000078 ! class A beta-lactamase|ARO:3000016 ! CTX-M beta-lactamase
gi|6977948|ARO_3000582|L1_beta-lactamase__Stenotrophomonas_maltophilia_	0	0	0	0	0	0	0	0	0	0	0	0	0	0	0	0	0	0	0	0	0	0	0	0	0	0	0	0	0	0	0	0	0	0	0	0	0	0	0	0	0	0	0	0	0	0	0	0	ARO:1000001 ! process or component of antibiotic biology or chemistry|ARO:3000000 ! determinant of antibiotic resistance|ARO:3000129 ! beta-lactam resistance gene|ARO:3000001 ! beta-lactamase|ARO:3000004 ! class B (metallo-) beta-lactamase|ARO:3000571 ! subclass B3 (metallo-) beta-lactamase
gi|698174198|ARO_3002146|DHA-15__Klebsiella_pneumoniae_	0	0	0	0	0	0	0	0	0	0	0	0	0	0	0	0	0	0	0	0	0	0	0	0	0	0	0	0	0	0	0	0	0	0	0	0	0	0	0	0	0	0	0	0	0	0	0	0	ARO:1000001 ! process or component of antibiotic biology or chemistry|ARO:3000000 ! determinant of antibiotic resistance|ARO:3000129 ! beta-lactam resistance gene|ARO:3000001 ! beta-lactamase|ARO:3000076 ! class C beta-lactamase|ARO:3000068 ! DHA beta-lactamase
gi|698174206|ARO_3002239|IMP-48__Pseudomonas_aeruginosa_	0	0	0	0	0	0	0	0	0	0	0	0	0	0	0	0	0	0	0	0	0	0	0	0	0	0	0	0	0	0	0	0	0	0	0	0	0	0	0	0	0	0	0	0	0	0	0	0	ARO:1000001 ! process or component of antibiotic biology or chemistry|ARO:3000000 ! determinant of antibiotic resistance|ARO:3000129 ! beta-lactam resistance gene|ARO:3000001 ! beta-lactamase|ARO:3000004 ! class B (metallo-) beta-lactamase|ARO:3000568 ! subclass B1 (metallo-) beta-lactamase|ARO:3000020 ! IMP beta-lactamase
gi|69957073|ARO_3002385|BEL-1__Pseudomonas_aeruginosa_	0	0	0	0	0	0	0	0	0	0	0	0	0	0	0	0	0	0	0	0	0	0	0	0	0	0	0	0	0	0	0	0	0	0	0	0	0	0	0	0	0	0	0	0	0	0	0	0	ARO:1000001 ! process or component of antibiotic biology or chemistry|ARO:3000000 ! determinant of antibiotic resistance|ARO:3000129 ! beta-lactam resistance gene|ARO:3000001 ! beta-lactamase|ARO:3000078 ! class A beta-lactamase|ARO:3002384 ! BEL beta-lactamase
gi|7007391|ARO_3002685|catIII__uncultured_bacterium_	0	0	0	0	0	0	0	0	0	0	0	0	0	0	0	0	0	0	0	0	0	0	0	0	0	0	0	0	0	0	0	0	0	0	0	0	0	0	0	0	0	0	0	0	0	0	0	0	ARO:1000001 ! process or component of antibiotic biology or chemistry|ARO:3000000 ! determinant of antibiotic resistance|ARO:3000557 ! antibiotic inactivation enzyme|ARO:3000122 ! chloramphenicol acetyltransferase (CAT)
gi|70609066|ARO_3002711|QnrA5__Shewanella_algae_	0	0	0	0	1.21082	0	0	0	0	0	0	0	0	0	0	0	0	0	0	0	0	0	0	0	0	0	0	1.06669	0	0	0	0	0	0	0	0	0	0	0	0	0	0	0	0	0	0	0	0	ARO:1000001 ! process or component of antibiotic biology or chemistry|ARO:3000000 ! determinant of antibiotic resistance|ARO:3000102 ! fluoroquinolone resistance gene|ARO:3000419 ! fluoroquinolone resistance protein
gi|71040522|ARO_3002868|dfrG__Staphylococcus_aureus_	0	0	0	0	0	0	0	0	0	0	0	0	0	0	0	0	0	0	0	0	0	0	0	0	0	0	0	0	0	0	0	0	0	0	0	0	0	0	0	0	0	0	0	0	0	0	0	0	ARO:1000001 ! process or component of antibiotic biology or chemistry|ARO:3000000 ! determinant of antibiotic resistance|ARO:3001217 ! trimethoprim resistance gene|ARO:3001218 ! trimethoprim resistant dihydrofolate reductase dfr
gi|7110136|ARO_3002945|vanHF__Paenibacillus_popilliae_ATCC_14706_	0	0	0	0	0	0	0	0	0	0	0	0	0	0	0	0	0	0	0	0	0	0	0	0	0	0	0	0	0	0	0	0	0	0	0	0	0	0	0	0	0	0	0	0	0	0	0	0	ARO:1000001 ! process or component of antibiotic biology or chemistry|ARO:3000000 ! determinant of antibiotic resistance|ARO:3000012 ! gene conferring antibiotic resistance via molecular bypass|ARO:3002976 ! gene associated with a glycopeptide resistance cluster|ARO:3000006 ! vanH
gi|7110137|ARO_3002908|vanF__Paenibacillus_popilliae_ATCC_14706_	0	0	0	0	0	0	0	0	0	0	0	0	0	0	0	0	0	0	0	0	0	0	0	0	0	0	0	0	0	0	0	0	0	0	0	0	0	0	0	0	0	0	0	0	0	0	0	0	ARO:1000001 ! process or component of antibiotic biology or chemistry|ARO:3000000 ! determinant of antibiotic resistance|ARO:3000012 ! gene conferring antibiotic resistance via molecular bypass|ARO:3002976 ! gene associated with a glycopeptide resistance cluster|ARO:3002906 ! van ligase|ARO:3002978 ! D-Ala-D-Lac ligase
gi|7110138|ARO_3002952|vanXF__Paenibacillus_popilliae_ATCC_14706_	0	0	0	0	0	0	0	0	0	0	0	0	0	0	0	0	0	0	0	0	0	0	0	0	0	0	0	0	0	0	0	0	0	0	0	0	0	0	0	0	0	0	0	0	0	0	0	0	ARO:1000001 ! process or component of antibiotic biology or chemistry|ARO:3000000 ! determinant of antibiotic resistance|ARO:3000012 ! gene conferring antibiotic resistance via molecular bypass|ARO:3002976 ! gene associated with a glycopeptide resistance cluster|ARO:3000011 ! vanX
gi|7110139|ARO_3002958|vanYF__Paenibacillus_popilliae_ATCC_14706_	0	0	0	0	0	0	0	0	0	0	0	0	0	0	0	0	0	0	0	0	0	0	0	0	0	0	0	0	0	0	0	0	0	0	0	0	0	0	0	0	0	0	0	0	0	0	0	0	ARO:1000001 ! process or component of antibiotic biology or chemistry|ARO:3000000 ! determinant of antibiotic resistance|ARO:3000012 ! gene conferring antibiotic resistance via molecular bypass|ARO:3002976 ! gene associated with a glycopeptide resistance cluster|ARO:3000077 ! vanY
gi|7110140|ARO_3002963|vanZF__Paenibacillus_popilliae_ATCC_14706_	0	0	0	0	0	0	0	0	0	0	0	0	0	0	0	0	0	0	0	0	0	0	0	0	0	0	0	0	0	0	0	0	0	0	0	0	0	0	0	0	0	0	0	0	0	0	0	0	ARO:1000001 ! process or component of antibiotic biology or chemistry|ARO:3000000 ! determinant of antibiotic resistance|ARO:3000012 ! gene conferring antibiotic resistance via molecular bypass|ARO:3002976 ! gene associated with a glycopeptide resistance cluster|ARO:3000116 ! vanZ
gi|7211795|ARO_3002813|lmrB__Corynebacterium_glutamicum_	0	0	0	0	0	0	0	0	0	0	0	0	0	0	0	0	0	0	0	0	0	0	0	0	0	0	0	0	0	0	0	0	0	0	0	0	0	0	0	0	0	0	0	0	0	0	0	0	ARO:1000001 ! process or component of antibiotic biology or chemistry|ARO:3000000 ! determinant of antibiotic resistance|ARO:3000159 ! efflux pump conferring antibiotic resistance|ARO:0010001 ! ATP-binding cassette (ABC) antibiotic efflux pump
gi|7243960|ARO_3002242|CARB-3__Pseudomonas_aeruginosa_	0	0	0	0	0	0	0	0	0	0	0	0	0	0	0	0	0	0	0	0	0	0	0	0	0	0	0	0	0	0	0	0	0	0	0	0	0	0	0	0	0	0	0	0	0	0	0	0	ARO:1000001 ! process or component of antibiotic biology or chemistry|ARO:3000000 ! determinant of antibiotic resistance|ARO:3000129 ! beta-lactam resistance gene|ARO:3000001 ! beta-lactamase|ARO:3000078 ! class A beta-lactamase|ARO:3000091 ! CARB beta-lactamase
gi|732998|ARO_3002897|sat-4__Campylobacter_coli_	0	0	0	0	0	0	0	0	0	0	0	0	0	0	0	0	0	0	0	0	0	0	0	0	0	0	0	0	0	0	0	0	0	0	0	0	0	0	0	0	0	0	0	0	0	0	0	0	ARO:1000001 ! process or component of antibiotic biology or chemistry|ARO:3000000 ! determinant of antibiotic resistance|ARO:3000868 ! streptothricin resistance gene|ARO:3000869 ! streptothricin acetyltransferase (sat)
gi|734511564|ARO_3001205|bleomycin_resistance_protein_(BRP)__Escherichia_coli_	0	0	0	0	0	0	0	0	0	0	0	0	0	0	0	0	0	0	0	0	0	0	0	0	0	0	0	0	0	0	0	0	0	0	0	0	0	0	0	0	0	0	0	0	0	0	0	0	ARO:1000001 ! process or component of antibiotic biology or chemistry|ARO:3000000 ! determinant of antibiotic resistance|ARO:3000494 ! glycopeptide resistance gene
gi|7380949|ARO_3002966|vanXYC__Enterococcus_gallinarum_	0	0	0	0	0	0	0	0	0	0	0	0	0	0	0	0	0	0	0	0	0	0	0	0	0	0	0	0	0	0	0	0	0	0	0	0	0	0	0	0	0	0	0	0	0	0	0	0	ARO:1000001 ! process or component of antibiotic biology or chemistry|ARO:3000000 ! determinant of antibiotic resistance|ARO:3000012 ! gene conferring antibiotic resistance via molecular bypass|ARO:3002976 ! gene associated with a glycopeptide resistance cluster|ARO:3000496 ! vanXY
gi|7381165|ARO_3002244|CARB-5__Acinetobacter_calcoaceticus_subsp__anitratus_	0	0	0	0	0	0	0	0	0	0	2.23883	0	0	0	0	0	0	0	0	0	0	0	0	0	7.73292	0	0	0	0	0	0	0	0	0	0	0	0	0	0	0	0	0	0	0	0	0	0	0	ARO:1000001 ! process or component of antibiotic biology or chemistry|ARO:3000000 ! determinant of antibiotic resistance|ARO:3000129 ! beta-lactam resistance gene|ARO:3000001 ! beta-lactamase|ARO:3000078 ! class A beta-lactamase|ARO:3000091 ! CARB beta-lactamase
gi|74229922|ARO_3001859|IMI-2__Enterobacter_asburiae_	0	0	0	0	0	0	0	0	0	0	0	0	0	0	0	0	0	0	0	0	0	0	0	0	0	0	0	0	0	0	0	0	0	0	0	0	0	0	0	0	0	0	0	0	0	0	0	0	ARO:1000001 ! process or component of antibiotic biology or chemistry|ARO:3000000 ! determinant of antibiotic resistance|ARO:3000129 ! beta-lactam resistance gene|ARO:3000001 ! beta-lactamase|ARO:3000078 ! class A beta-lactamase|ARO:3000018 ! IMI beta-lactamase
gi|74268793|ARO_3002856|dfrA24__Escherichia_coli_	0	0	0	0	0	0	0	0	0	0	0	0	0	0	0	0	0	0	0	0	0	0	0	0	0	0	0	0	0	0	0	0	0	0	0	0	0	0	0	0	0	0	0	0	0	0	0	0	ARO:1000001 ! process or component of antibiotic biology or chemistry|ARO:3000000 ! determinant of antibiotic resistance|ARO:3001217 ! trimethoprim resistance gene|ARO:3001218 ! trimethoprim resistant dihydrofolate reductase dfr
gi|748445538|ARO_3003209|FosA5__Escherichia_coli_	0	0	0	0	0	0	0	0	0	0	0	0	0	0	0	0	0	0	0	0	0	0	0	0	0	0	0	0	0	0	0	0	0	0	0	0	0	0	0	0	0	0	0	0	0	0	0	0	ARO:1000001 ! process or component of antibiotic biology or chemistry|ARO:3000000 ! determinant of antibiotic resistance|ARO:3000271 ! fosfomycin resistance gene|ARO:3000342 ! fosfomycin inactivation enzyme|ARO:3000133 ! fosfomycin thiol transferase
gi|757399522|ARO_3003167|CTX-M-159__Proteus_mirabilis_	0	0	0	0	0	0	0	0	0	0	0	0	0	0	0	0	0	0	0	0	0	0	0	0	0	0	0	0	0	0	0	0	0	0	0	0	0	0	0	0	0	0	0	0	0	0	0	0	ARO:1000001 ! process or component of antibiotic biology or chemistry|ARO:3000000 ! determinant of antibiotic resistance|ARO:3000129 ! beta-lactam resistance gene|ARO:3000001 ! beta-lactamase|ARO:3000078 ! class A beta-lactamase|ARO:3000016 ! CTX-M beta-lactamase
gi|76365451|ARO_3000865|oleD__Streptomyces_antibioticus_	0	0	0	0	0	0	0	0	0	0	0	0	0	0	0	0	0	0	0	0	0	0	0	0	0	0	0	0	0	0	0	0	0	0	0	0	0	0	0	0	0	0	0	0	0	0	0	0	ARO:1000001 ! process or component of antibiotic biology or chemistry|ARO:3000000 ! determinant of antibiotic resistance|ARO:3000557 ! antibiotic inactivation enzyme|ARO:3000201 ! macrolide inactivation enzyme|ARO:3000458 ! macrolide glycosyltransferase|ARO:3000465 ! ole glycosyltransferase
gi|77380194|ARO_3000575|vanU__Enterococcus_faecalis_	0	0	0	0	0	0	0	0	0	0	0	0	0	0	0	0	0	0	0	0	0	0	0	0	0	0	0	0	0	0	0	0	0	0	0	0	0	0	0	0	0	0	0	0	0	0	0	0	ARO:1000001 ! process or component of antibiotic biology or chemistry|ARO:3000000 ! determinant of antibiotic resistance|ARO:3000012 ! gene conferring antibiotic resistance via molecular bypass|ARO:3002976 ! gene associated with a glycopeptide resistance cluster
gi|77380195|ARO_3002926|vanRG__Enterococcus_faecalis_	0	0	0	0	0	0	0	0	0	0	0	0	0	0	0	0	0	0	0	0	0	0	0	0	0	0	0	0	0	0	0	0	0	0	0	0	0	0	0	0	0	0	0	0	0	0	0	0	ARO:1000001 ! process or component of antibiotic biology or chemistry|ARO:3000000 ! determinant of antibiotic resistance|ARO:3000012 ! gene conferring antibiotic resistance via molecular bypass|ARO:3002976 ! gene associated with a glycopeptide resistance cluster|ARO:3002905 ! VanS-VanR two-component regulatory system|ARO:3000574 ! vanR
gi|77380196|ARO_3002937|vanSG__Enterococcus_faecalis_	0	0	0	0	0	0	0	0	0	0	0	0	0	0	0	0	0	0	0	0	0	0	0	0	0	0	0	0	0	0	0	0	0	0	0	0	0	0	0	0	0	0	0	0	0	0	0	0	ARO:1000001 ! process or component of antibiotic biology or chemistry|ARO:3000000 ! determinant of antibiotic resistance|ARO:3000012 ! gene conferring antibiotic resistance via molecular bypass|ARO:3002976 ! gene associated with a glycopeptide resistance cluster|ARO:3002905 ! VanS-VanR two-component regulatory system|ARO:3000071 ! vanS
gi|77380197|ARO_3002959|vanYG1__Enterococcus_faecalis_	0	0	0	0	0	0	0	0	0	0	0	0	0	0	0	0	0	0	0	0	0	0	0	0	0	0	0	0	0	0	0	0	0	0	0	0	0	0	0	0	0	0	0	0	0	0	0	0	ARO:1000001 ! process or component of antibiotic biology or chemistry|ARO:3000000 ! determinant of antibiotic resistance|ARO:3000012 ! gene conferring antibiotic resistance via molecular bypass|ARO:3002976 ! gene associated with a glycopeptide resistance cluster|ARO:3000077 ! vanY
gi|77380198|ARO_3002965|vanWG__Enterococcus_faecalis_	0	0	0	0	0	0	0	0	0	0	0	0	0	0	0	0	0	0	0	0	0	0	0	0	0	0	0	0	0	0	0	0	0	0	0	0	0	0	0	0	0	0	0	0	0	0	0	0	ARO:1000001 ! process or component of antibiotic biology or chemistry|ARO:3000000 ! determinant of antibiotic resistance|ARO:3000012 ! gene conferring antibiotic resistance via molecular bypass|ARO:3002976 ! gene associated with a glycopeptide resistance cluster|ARO:3000002 ! vanW
gi|77380199|ARO_3002909|vanG__Enterococcus_faecalis_	0	0	0	0	0	0	0	0	0	0	0	0	0	0	0	0	0	0	0	0	0	0	0	0	0	0	0	0	0	0	0	0	0	0	0	0	0	0	0	0	0	0	0	0	0	0	0	0	ARO:1000001 ! process or component of antibiotic biology or chemistry|ARO:3000000 ! determinant of antibiotic resistance|ARO:3000012 ! gene conferring antibiotic resistance via molecular bypass|ARO:3002976 ! gene associated with a glycopeptide resistance cluster|ARO:3002906 ! van ligase|ARO:3002979 ! D-Ala-D-Ser ligase
gi|77380200|ARO_3003069|vanXYG__Enterococcus_faecalis_	0	0	0	0	0	0	0	0	0	0	0	0	0	0	0	0	0	0	0	0	0	0	0	0	0	0	0	0	0	0	0	0	0	0	0	0	0	0	0	0	0	0	0	0	0	0	0	0	ARO:1000001 ! process or component of antibiotic biology or chemistry|ARO:3000000 ! determinant of antibiotic resistance|ARO:3000012 ! gene conferring antibiotic resistance via molecular bypass|ARO:3002976 ! gene associated with a glycopeptide resistance cluster|ARO:3000496 ! vanXY
gi|77380201|ARO_3002972|vanTG__Enterococcus_faecalis_	0	0	0	0	0	0	0	0	0	0	0	0	0	0	0	0	0	0	0	0	0	0	0	0	0	0	0	0	0	0	0	0	0	0	0	0	0	0	0	0	0	0	0	0	0	0	0	0	ARO:1000001 ! process or component of antibiotic biology or chemistry|ARO:3000000 ! determinant of antibiotic resistance|ARO:3000012 ! gene conferring antibiotic resistance via molecular bypass|ARO:3002976 ! gene associated with a glycopeptide resistance cluster|ARO:3000372 ! vanT
gi|801884|ARO_3002931|vanSA__Enterococcus_faecium_	0	0	0	0	0	0	0	0	0	0	0	0	0	0	0	0	0	0	0	0	0	0	0	0	0	0	0	0	0	0	0	0	0	0	0	0	0	0	0	0	0	0	0	0	0	0	0	0	ARO:1000001 ! process or component of antibiotic biology or chemistry|ARO:3000000 ! determinant of antibiotic resistance|ARO:3000012 ! gene conferring antibiotic resistance via molecular bypass|ARO:3002976 ! gene associated with a glycopeptide resistance cluster|ARO:3002905 ! VanS-VanR two-component regulatory system|ARO:3000071 ! vanS
gi|801885|ARO_3002962|vanZA__Enterococcus_faecium_	0	0	0	0	0	0	0	0	0	0	0	0	0	0	0	0	0	0	0	0	0	0	0	0	0	0	0	0	0	0	0	0	0	0	0	0	0	0	0	0	0	0	0	0	0	0	0	0	ARO:1000001 ! process or component of antibiotic biology or chemistry|ARO:3000000 ! determinant of antibiotic resistance|ARO:3000012 ! gene conferring antibiotic resistance via molecular bypass|ARO:3002976 ! gene associated with a glycopeptide resistance cluster|ARO:3000116 ! vanZ
gi|81242205|ARO_3000516|emrR__Shigella_dysenteriae_Sd197_	0	0	0	0	1.21082	0	0	0	0	3.53001	0	0	0	0	0	0	8.02908	0	0	2.13981	0	0	0	7.73396	0	0	0	0	0	0	0	0	0	0	21.3562	9.88575	0	0	0	0	0	0	0	1.55768	0	0	0	0	ARO:1000001 ! process or component of antibiotic biology or chemistry|ARO:3000000 ! determinant of antibiotic resistance|ARO:3000451 ! gene modulating antibiotic efflux
gi|81343248|ARO_3003020|dfrA25__Salmonella_enterica_subsp__enterica_serovar_Agona_	0	0	0	0	0	0	0	0	0	0	0	0	0	0	0	0	0	0	0	0	0	0.898783	0	0	0	0	0	0	0	0	0	0	0	0	0	0	0	2.6055	0	0	0	0	0	0	0	0	0	0	ARO:1000001 ! process or component of antibiotic biology or chemistry|ARO:3000000 ! determinant of antibiotic resistance|ARO:3001217 ! trimethoprim resistance gene|ARO:3001218 ! trimethoprim resistant dihydrofolate reductase dfr
gi|847647|ARO_3002558|AAC(6_)-Ik__Acinetobacter_sp__CIP-A165_	0	0	0	0	0	0	0	0	0	0	0	0	0	0	0	0	0	0	0	0	0	0	0	0	0	0	0	0	0	0	0	0	0	0	0	0	0	0	0	0	0	0	0	0	0	0	0	0	ARO:1000001 ! process or component of antibiotic biology or chemistry|ARO:3000000 ! determinant of antibiotic resistance|ARO:3000104 ! aminoglycoside resistance gene|ARO:3000121 ! aminoglycoside acetyltransferase (AAC)|ARO:3000345 ! AAC(6')
gi|84993818|ARO_3002640|APH(3__)-Ic__Mycobacterium_fortuitum_	0	0	0	0	0	0	0	0	0	0	0	0	0	0	0	0	0	0	0	0	0	0	0	0	0	0	0	0	0	0	0	0	0	0	0	0	0	0	0	0	0	0	0	0	0	0	0	0	ARO:1000001 ! process or component of antibiotic biology or chemistry|ARO:3000000 ! determinant of antibiotic resistance|ARO:3000557 ! antibiotic inactivation enzyme|ARO:3000114 ! aminoglycoside phosphotransferase (APH)|ARO:3000127 ! APH(3'')
gi|85676531|ARO_3000795|mdtE__Escherichia_coli_str__K-12_substr__W3110_	0	0	0	0	0	0	0	0	0	0	0	0	0	0	0	0	0	0	0	0	0	0	0	0	0	0	0	0	0	0	0	0	0	0	0	0	0	0	0	0	0	0	0	0	0	0	0	0	ARO:1000001 ! process or component of antibiotic biology or chemistry|ARO:3000000 ! determinant of antibiotic resistance|ARO:3000159 ! efflux pump conferring antibiotic resistance|ARO:3000748 ! subunit of efflux pump conferring antibiotic resistance
gi|85676683|ARO_3000518|CRP__Escherichia_coli_str__K-12_substr__W3110_	0	0	0	0	6.98548	0	0	0	0	19.5508	0	0	0	0	0	0	0	0	0	0	0	0	0	8.9238	0	0	0	24.6159	9.08766	0	0	0	0	0	27.2954	9.12531	0	0	0	0	0	0	0	0	0	0	0	0	ARO:1000001 ! process or component of antibiotic biology or chemistry|ARO:3000000 ! determinant of antibiotic resistance|ARO:3000451 ! gene modulating antibiotic efflux
gi|85676832|ARO_3003550|mdtP__Escherichia_coli_str__K-12_substr__W3110_	0	0	0	0	0	0	0	0	0	0	0	0	0	0	0	0	0	0	0	0	0	0	0	0	0	0	0	0	0	0	0	0	0	0	0	0	0	0	0	0	0	0	0	0	0	0	0	0	ARO:1000001 ! process or component of antibiotic biology or chemistry|ARO:3000000 ! determinant of antibiotic resistance|ARO:3000159 ! efflux pump conferring antibiotic resistance|ARO:0010002 ! major facilitator superfamily (MFS) antibiotic efflux pump
gi|85676833|ARO_3003549|mdtO__Escherichia_coli_str__K-12_substr__W3110_	0	0	0	0	0	0	0	0	0	0	0	0	0	0	0	0	0	0	0	0	0	0	0	0	0	0	0	0	0	0	0	0	0	0	0	0	0	0	0	0	0	0	0	0	0	0	0	0	ARO:1000001 ! process or component of antibiotic biology or chemistry|ARO:3000000 ! determinant of antibiotic resistance|ARO:3000159 ! efflux pump conferring antibiotic resistance|ARO:0010002 ! major facilitator superfamily (MFS) antibiotic efflux pump
gi|85676834|ARO_3003548|mdtN__Escherichia_coli_str__K-12_substr__W3110_	0	0	0	0	0	0	0	0	0	0	0	0	0	0	0	0	0	0	0	0	0	0	0	0	0	0	0	0	0	0	0	0	0	0	0	0	0	0	0	0	0	0	0	0	0	0	0	0	ARO:1000001 ! process or component of antibiotic biology or chemistry|ARO:3000000 ! determinant of antibiotic resistance|ARO:3000159 ! efflux pump conferring antibiotic resistance|ARO:0010002 ! major facilitator superfamily (MFS) antibiotic efflux pump
gi|85676865|ARO_3003582|PmrA__Escherichia_coli_str__K-12_substr__W3110_	0	0	0	0	0	0	0	0	0	0	0	0	0	0	0	0	0	0	0	0	0	0	0	0	0	0	0	0	0	0	0	0	0	0	0	0	0	0	0	0	0	0	0	0	0	0	0	0	ARO:1000001 ! process or component of antibiotic biology or chemistry|ARO:3000000 ! determinant of antibiotic resistance|ARO:3002984 ! polymyxin resistance gene
gi|85676866|ARO_3003576|PmrC__Escherichia_coli_str__K-12_substr__W3110_	0	0	0	0	0	0	0	0	0	0	0	0	0	0	0	0	0	0	0	0	0	0	0	0	0	0	0	0	0	0	0	0	0	0	0	0	0	0	0	0	0	0	0	0	0	0	0	0	ARO:1000001 ! process or component of antibiotic biology or chemistry|ARO:3000000 ! determinant of antibiotic resistance|ARO:3003580 ! gene altering cell wall charge conferring antibiotic resistance
gi|87081828|ARO_3001216|mdtH__Escherichia_coli_str__K-12_substr__MG1655_	0	0	0	0	0	0	0	0	0	0	0	0	0	0	0	0	0	0	0	0	0	0	0	0	0	0	0	0	0	0	0	0	0	0	0	0	0	0	0	0	0	0	0	0	0	0	0	0	ARO:1000001 ! process or component of antibiotic biology or chemistry|ARO:3000000 ! determinant of antibiotic resistance|ARO:3000159 ! efflux pump conferring antibiotic resistance|ARO:0010002 ! major facilitator superfamily (MFS) antibiotic efflux pump
gi|87082036|ARO_3000792|mdtA__Escherichia_coli_str__K-12_substr__MG1655_	0	0	0	0	0	0	0	0	0	0	0	0	0	0	0	0	0	0	0	0	0	0	0	0	0	0	0	0	0	0	0	0	0	0	0	0	0	0	0	0	0	0	0	0	0	0	0	0	ARO:1000001 ! process or component of antibiotic biology or chemistry|ARO:3000000 ! determinant of antibiotic resistance|ARO:3000159 ! efflux pump conferring antibiotic resistance|ARO:3000748 ! subunit of efflux pump conferring antibiotic resistance
gi|88194116|ARO_3000026|mepA__Staphylococcus_aureus_subsp__aureus_NCTC_8325_	0	0	0	0	0	0	0	0	0	0	0	0	0	0	0	0	0	0	0	0	0	0	0	0	0	0	0	0	0	0	0	0	0	0	0	0	0	0	0	0	0	0	0	0	0	0	0	0	ARO:1000001 ! process or component of antibiotic biology or chemistry|ARO:3000000 ! determinant of antibiotic resistance|ARO:3000159 ! efflux pump conferring antibiotic resistance|ARO:3000112 ! multidrug and toxic compound extrusion (MATE) transporter
gi|88195144|ARO_3000839|arlS__Staphylococcus_aureus_subsp__aureus_NCTC_8325_	0	0	0	0	0	0	0	0	0	0	0	0	0	0	0	0	0	0	0	0	0	0	0	0	0	0	0	0	0	0	0	0	0	0	0	0	0	0	0	0	0	0	0	0	0	0	0	0	ARO:1000001 ! process or component of antibiotic biology or chemistry|ARO:3000000 ! determinant of antibiotic resistance|ARO:3000451 ! gene modulating antibiotic efflux|ARO:3000547 ! arlRS
gi|8980430|ARO_3000606|FEZ-1_beta-lactamase__Fluoribacter_gormanii_	0	0	0	0	0	0	0	0	0	0	0	0	0	0	0	0	0	0	0	0	0	0	0	0	0	0	0	0	0	0	0	0	0	0	0	0	0	0	0	0	0	0	0	0	0	0	0	0	ARO:1000001 ! process or component of antibiotic biology or chemistry|ARO:3000000 ! determinant of antibiotic resistance|ARO:3000129 ! beta-lactam resistance gene|ARO:3000001 ! beta-lactamase|ARO:3000004 ! class B (metallo-) beta-lactamase|ARO:3000571 ! subclass B3 (metallo-) beta-lactamase
gi|908888|ARO_3003026|fusH__Streptomyces_lividans_	0	0	0	0	0	0	0	0	0	0	0	0	0	0	0	0	0	0	0	0	0	0	0	0	0	0	0	0	0	0	0	0	0	0	0	0	0	0	0	0	0	0	0	0	0	0	0	0	ARO:1000001 ! process or component of antibiotic biology or chemistry|ARO:3000000 ! determinant of antibiotic resistance|ARO:3003024 ! fusidic acid resistance gene|ARO:3003025 ! fusidic acid inactivation enzyme
gi|9246954|ARO_3002844|vatE__Enterococcus_faecium_	0	0	0	0	0	0	0	0	0	0	0	0	0	0	0	0	0	0	0	0	0	0	0	0	0	0	0	0	0	0	0	0	0	0	0	0	0	0	0	0	0	0	0	0	0	0	0	0	ARO:1000001 ! process or component of antibiotic biology or chemistry|ARO:3000000 ! determinant of antibiotic resistance|ARO:3000240 ! streptogramin resistance gene|ARO:3000233 ! streptogramin inactivation enzyme|ARO:3000453 ! vat acetyltransferase
gi|926995|ARO_3002674|catB__Clostridium_butyricum_	0	0	0	0	0	0	0	0	0	0	0	0	0	0	0	0	0	0	0	0	0	0	0	0	0	0	0	0	0	0	0	0	0	0	0	0	0	0	0	0	0	0	0	0	0	0	0	0	ARO:1000001 ! process or component of antibiotic biology or chemistry|ARO:3000000 ! determinant of antibiotic resistance|ARO:3000557 ! antibiotic inactivation enzyme|ARO:3000122 ! chloramphenicol acetyltransferase (CAT)
gi|9294730|ARO_3002922|vanRC__Enterococcus_gallinarum_	0	0	0	0	0	0	0	0	0	0	0	0	0	0	0	0	0	0	0	0	0	0	0	0	0	0	0	0	0	0	0	0	0	0	0	0	0	0	0	0	0	0	0	0	0	0	0	0	ARO:1000001 ! process or component of antibiotic biology or chemistry|ARO:3000000 ! determinant of antibiotic resistance|ARO:3000012 ! gene conferring antibiotic resistance via molecular bypass|ARO:3002976 ! gene associated with a glycopeptide resistance cluster|ARO:3002905 ! VanS-VanR two-component regulatory system|ARO:3000574 ! vanR
gi|9294731|ARO_3002933|vanSC__Enterococcus_gallinarum_	0	0	0	0	0	0	0	0	0	0	0	0	0	0	0	0	0	0	0	0	0	0	0	0	0	0	0	0	0	0	0	0	0	0	0	0	0	0	0	0	0	0	0	0	0	0	0	0	ARO:1000001 ! process or component of antibiotic biology or chemistry|ARO:3000000 ! determinant of antibiotic resistance|ARO:3000012 ! gene conferring antibiotic resistance via molecular bypass|ARO:3002976 ! gene associated with a glycopeptide resistance cluster|ARO:3002905 ! VanS-VanR two-component regulatory system|ARO:3000071 ! vanS
gi|9294816|ARO_3001816|ACC-2__Hafnia_alvei_	0	0	0	0	0	0	0	0	0	0	0	0	0	0	0	0	0	0	0	0	0	0	0	0	0	0	0	0	0	0	0	0	0	0	0	0	0	0	0	0	0	0	0	0	0	0	0	0	ARO:1000001 ! process or component of antibiotic biology or chemistry|ARO:3000000 ! determinant of antibiotic resistance|ARO:3000129 ! beta-lactam resistance gene|ARO:3000001 ! beta-lactamase|ARO:3000076 ! class C beta-lactamase|ARO:3000073 ! ACC beta-lactamase
gi|950044|ARO_3003012|dfrA13__Escherichia_coli_	0	0	0	0	0	0	0	0	0	0	0	0	0	0	0	0	0	0	0	0	0	0	0	0	0	0	0	0	0	0	0	0	0	0	0	0	0	0	0	0	0	0	0	0	0	0	0	0	ARO:1000001 ! process or component of antibiotic biology or chemistry|ARO:3000000 ! determinant of antibiotic resistance|ARO:3001217 ! trimethoprim resistance gene|ARO:3001218 ! trimethoprim resistant dihydrofolate reductase dfr
gi|953191|ARO_3002645|APH(3_)-IIb__Pseudomonas_aeruginosa_	0	0	0	0	0	0	0	0	0	0	0	0	0	0	0	0	0	0	0	0	0	0	0	0	0	0	0	0	0	0	0	0	0	0	0	0	0	0	0	0	0	0	0	0	0	0	0	0	ARO:1000001 ! process or component of antibiotic biology or chemistry|ARO:3000000 ! determinant of antibiotic resistance|ARO:3000557 ! antibiotic inactivation enzyme|ARO:3000114 ! aminoglycoside phosphotransferase (APH)|ARO:3000126 ! APH(3')
gi|98991148|ARO_3000866|oleI__Streptomyces_antibioticus_	0	0	0	0	0	0	0	0	0	0	0	0	0	0	0	0	0	0	0	0	0	0	0	0	0	0	0	0	0	0	0	0	0	0	0	0	0	0	0	0	0	0	0	0	0	0	0	0	ARO:1000001 ! process or component of antibiotic biology or chemistry|ARO:3000000 ! determinant of antibiotic resistance|ARO:3000557 ! antibiotic inactivation enzyme|ARO:3000201 ! macrolide inactivation enzyme|ARO:3000458 ! macrolide glycosyltransferase|ARO:3000465 ! ole glycosyltransferase
gi|98991152|ARO_3000462|mgt__Streptomyces_lividans_	0	0	0	0	0	0	0	0	0	0	0	0	0	0	0	0	0	0	0	0	0	0	0	0	0	0	0	0	0	0	0	0	0	0	0	0	0	0	0	0	0	0	0	0	0	0	0	0	ARO:1000001 ! process or component of antibiotic biology or chemistry|ARO:3000000 ! determinant of antibiotic resistance|ARO:3000557 ! antibiotic inactivation enzyme|ARO:3000201 ! macrolide inactivation enzyme|ARO:3000458 ! macrolide glycosyltransferase
gi|99079563|ARO_3002881|lmrC__Lactococcus_lactis_subsp__lactis_	0	0	0	0	0	0	0	0	0	0	0	0	0	0	0	0	0	0	0	0	0	0	0	0	0	0	0	0	0	0	0	0	0	0	0	0	0	0	0	0	0	0	0	0	0	0	0	0	ARO:1000001 ! process or component of antibiotic biology or chemistry|ARO:3000000 ! determinant of antibiotic resistance|ARO:3000159 ! efflux pump conferring antibiotic resistance|ARO:0010001 ! ATP-binding cassette (ABC) antibiotic efflux pump
gi|99079595|ARO_3002882|lmrD__Lactococcus_lactis_subsp__lactis_	0	1.79663	0	0	0	0	0	0	0	0	0	0	0	0	0	0	0	0	0	0	0	0	0	0	0	0	0	0	0	0	0	0	0	0	0	0	0	0	0	0	0	0	0	0	0	0	0	0	ARO:1000001 ! process or component of antibiotic biology or chemistry|ARO:3000000 ! determinant of antibiotic resistance|ARO:3000159 ! efflux pump conferring antibiotic resistance|ARO:0010001 ! ATP-binding cassette (ABC) antibiotic efflux pump
gi|9909831|ARO_3002514|OCH-1__Ochrobactrum_anthropi_	0	0	0	0	0	0	0	0	0	0	0	0	0	0	0	0	0	0	0	0	0	0	0	0	0	0	0	0	0	0	0	0	0	0	0	0	0	0	0	0	0	0	0	0	0	0	0	0	ARO:1000001 ! process or component of antibiotic biology or chemistry|ARO:3000000 ! determinant of antibiotic resistance|ARO:3000129 ! beta-lactam resistance gene|ARO:3000001 ! beta-lactamase|ARO:3000076 ! class C beta-lactamase|ARO:3000094 ! OCH beta-lactamase
gi|9945806|ARO_3002703|cmx__Corynebacterium_striatum_	0	0	0	0	0	0	0	0	0	0	0	0	0	0	0	0	0	0	2.51317	0	0	0	0	0	0	0	0	0	0	0	0	0	0	0	0	0	0	0	2.21673	0	0	0	0	0	0	0	0	2.14538	ARO:1000001 ! process or component of antibiotic biology or chemistry|ARO:3000000 ! determinant of antibiotic resistance|ARO:3000159 ! efflux pump conferring antibiotic resistance|ARO:0010002 ! major facilitator superfamily (MFS) antibiotic efflux pump|ARO:3001213 ! chloramphenicol resistance efflux pump
gi|AAF71280|ARO_3000002|vanW__Enterococcus_faecalis_	0	0	0	0	0	0	0	0	0	0	0	0	0	0	0	0	0	0	0	0	0	0	0	0	0	0	0	0	0	0	0	0	0	0	0	0	0	0	0	0	0	0	0	0	0	0	0	0	ARO:1000001 ! process or component of antibiotic biology or chemistry|ARO:3000000 ! determinant of antibiotic resistance|ARO:3000012 ! gene conferring antibiotic resistance via molecular bypass|ARO:3002976 ! gene associated with a glycopeptide resistance cluster
gi|AAG05661_1|ARO_3000836|soxR__Pseudomonas_aeruginosa_PAO1_	0	0	0	0	0	0	0	0	0	0	0	0	0	0	0	0	0	0	0	0	0	0	0	0	0	0	0	0	0	0	0	0	0	0	0	0	0	0	0	0	0	0	0	0	0	0	0	0	ARO:1000001 ! process or component of antibiotic biology or chemistry|ARO:3000000 ! determinant of antibiotic resistance|ARO:0000031 ! antibiotic resistant gene variant or mutant|ARO:3000219 ! mutant efflux regulatory protein conferring antibiotic resistance
gi|AAG07064_1|ARO_3003693|mexK__Pseudomonas_aeruginosa_PAO1_	0	0	0	0	0	0	2.88786	0	0	0	0	0	0	0	0	0	0	0	2.09431	0	0	0	0	0	0	0	0	0	0	0	0	1.29159	0	0	3.28556	0	0	0	0	0	0	0	0	0	0	0	0	0	ARO:1000001 ! process or component of antibiotic biology or chemistry|ARO:3000000 ! determinant of antibiotic resistance|ARO:3000159 ! efflux pump conferring antibiotic resistance|ARO:3000748 ! subunit of efflux pump conferring antibiotic resistance
gi|AAG07762_1|ARO_3003030|mexV__Pseudomonas_aeruginosa_PAO1_	0	0	0	0	0	0	0	0	0	0	0	0	0	0	0	0	0	0	0	0	0	0	0	0	0	0	0	0	0	0	0	0	0	0	0	0	0	0	0	0	0	0	0	0	0	0	0	0	ARO:1000001 ! process or component of antibiotic biology or chemistry|ARO:3000000 ! determinant of antibiotic resistance|ARO:3000159 ! efflux pump conferring antibiotic resistance|ARO:3000748 ! subunit of efflux pump conferring antibiotic resistance
gi|AAG07763_1|ARO_3003031|mexW__Pseudomonas_aeruginosa_PAO1_	0	0	0	0	0	0	0	0	0	0	0	0	0	0	0	0	0	0	0	0	0	0	0	0	0	0	0	0	0	0	0	0	0	0	0	0	0	0	0	0	0	0	0	0	0	0	0	0	ARO:1000001 ! process or component of antibiotic biology or chemistry|ARO:3000000 ! determinant of antibiotic resistance|ARO:3000159 ! efflux pump conferring antibiotic resistance|ARO:3000748 ! subunit of efflux pump conferring antibiotic resistance
gi|AAM15533_1|ARO_3003688|PvrR__Pseudomonas_aeruginosa_	0	0	0	0	0	0	0	0	0	0	0	0	0	0	0	0	0	0	0	0	0	0	0	0	0	0	0	0	0	0	0	0	0	0	0	0	0	0	0	0	0	0	0	0	0	0	0	0	ARO:1000001 ! process or component of antibiotic biology or chemistry|ARO:3000000 ! determinant of antibiotic resistance|ARO:3000492 ! gene involved in self resistance to antibiotic
gi|ACL31576_1|ARO_3000860|rmtB__Pseudomonas_aeruginosa_	0	0	0	0	0	0	0	0	0	0	0	0	0	0	0	0	0	0	0	0	0	0	0	0	0	0	0	0	0	0	0	0	0	0	0	0	0	0	0	0	0	0	0	0	0	0	0	0	ARO:1000001 ! process or component of antibiotic biology or chemistry|ARO:3000000 ! determinant of antibiotic resistance|ARO:3000519 ! antibiotic target modifying enzyme|ARO:3000164 ! rRNA methyltransferase conferring antibiotic resistance|ARO:3000857 ! 16S ribosomal RNA methyltransferase
gi|ACM47284|ARO_3002934|vanSD__Enterococcus_faecium_	0	0	0	0	0	0	0	0	0	0	0	0	0	0	0	0	0	0	0	0	0	0	0	0	0	0	0	0	0	0	0	0	0	0	0	0	0	0	0	0	0	0	0	0	0	0	0	0	ARO:1000001 ! process or component of antibiotic biology or chemistry|ARO:3000000 ! determinant of antibiotic resistance|ARO:3000012 ! gene conferring antibiotic resistance via molecular bypass|ARO:3002976 ! gene associated with a glycopeptide resistance cluster|ARO:3002905 ! VanS-VanR two-component regulatory system|ARO:3000071 ! vanS
gi|AEU17992_1|ARO_3000835|phoQ__Pseudomonas_aeruginosa_	0	0	0	0	0	0	0	0	0	0	0	0	0	0	0	0	0	0	0	0	0	0	1.38122	0	0	0	0	0	0	0	0	0	0	0	0	0	0	0	0	0	0	0	0	0	0	0	0	0	ARO:1000001 ! process or component of antibiotic biology or chemistry|ARO:3000000 ! determinant of antibiotic resistance|ARO:3000451 ! gene modulating antibiotic efflux|ARO:3000750 ! subunit of gene modulating antibiotic efflux
gi|AEU18003_1|ARO_3000834|phoP__Pseudomonas_aeruginosa_	0	0	0	0	0	0	0	0	0	0	0	0	0	0	0	0	0	0	0	0	0	0	0	0	0	0	0	0	0	0	0	0	0	0	0	0	0	0	0	0	0	0	0	0	0	0	0	0	ARO:1000001 ! process or component of antibiotic biology or chemistry|ARO:3000000 ! determinant of antibiotic resistance|ARO:3000451 ! gene modulating antibiotic efflux|ARO:3000750 ! subunit of gene modulating antibiotic efflux
gi|AEX49906_1|ARO_3003583|PmrB__Pseudomonas_aeruginosa_	0	0	0	0	0	0	0	0	0	0	0	0	0	0	0	0	0	0	0	0	0	0	0	0	0	0	0	0	0	0	0	0	0	0	0	0	0	0	0	0	0	0	0	0	0	0	0	0	ARO:1000001 ! process or component of antibiotic biology or chemistry|ARO:3000000 ! determinant of antibiotic resistance|ARO:3002984 ! polymyxin resistance gene
gi|AEX49909_1|ARO_3003582|PmrA__Pseudomonas_aeruginosa_	0	0	0	0	0	0	0	0	0	0	0	0	0	0	0	0	0	0	0	0	0	0	0	0	0	0	0	0	0	0	0	0	0	0	0	0	0	0	0	0	0	0	0	0	0	0	0	0	ARO:1000001 ! process or component of antibiotic biology or chemistry|ARO:3000000 ! determinant of antibiotic resistance|ARO:3002984 ! polymyxin resistance gene
gi|AJP77054|ARO_3003716|CPS-1__Chryseobacterium_sp__Stok-1_	0	0	0	0	0	0	0	0	0	0	0	0	0	0	0	0	0	0	0	0	0	0	0	0	0	0	0	0	0	0	0	0	0	0	0	0	0	0	0	0	0	0	0	0	0	0	0	0	ARO:1000001 ! process or component of antibiotic biology or chemistry|ARO:3000000 ! determinant of antibiotic resistance|ARO:3000129 ! beta-lactam resistance gene|ARO:3000001 ! beta-lactamase|ARO:3000004 ! class B (metallo-) beta-lactamase|ARO:3000571 ! subclass B3 (metallo-) beta-lactamase
gi|AJP77057|ARO_3003718|MSI-1__Massilia_sp__SB1-3_	0	0	0	0	0	0	0	0	0	0	0	0	0	0	0	0	0	0	0	0	0	0	0	0	0	0	0	0	0	0	0	0	0	0	0	0	0	0	0	0	0	0	0	0	0	0	0	0	ARO:1000001 ! process or component of antibiotic biology or chemistry|ARO:3000000 ! determinant of antibiotic resistance|ARO:3000129 ! beta-lactam resistance gene|ARO:3000001 ! beta-lactamase|ARO:3000004 ! class B (metallo-) beta-lactamase|ARO:3000571 ! subclass B3 (metallo-) beta-lactamase
gi|AJP77058|ARO_3003719|MSI-OXA__Massilia_sp__SB1-3_	0	0	0	0	0	0	0	0	0	0	0	0	0	0	0	0	0	0	0	0	0	0	0	0	0	0	0	0	0	0	0	0	0	0	0	0	0	0	0	0	0	0	0	0	0	0	0	0	ARO:1000001 ! process or component of antibiotic biology or chemistry|ARO:3000000 ! determinant of antibiotic resistance|ARO:3000129 ! beta-lactam resistance gene|ARO:3000001 ! beta-lactamase|ARO:3000075 ! class D beta-lactamase
gi|AJP77059|ARO_3003670|PEDO-1__Pedobacter_sp__SI-33_	0	0	0	0	0	0	0	0	0	0	0	0	0	0	0	0	0	0	0	0	0	0	0	0	0	0	0	0	0	0	0	0	0	0	0	0	0	0	0	0	0	0	0	0	0	0	0	0	ARO:1000001 ! process or component of antibiotic biology or chemistry|ARO:3000000 ! determinant of antibiotic resistance|ARO:3000129 ! beta-lactam resistance gene|ARO:3000001 ! beta-lactamase|ARO:3000004 ! class B (metallo-) beta-lactamase|ARO:3000571 ! subclass B3 (metallo-) beta-lactamase
gi|AJP77071|ARO_3003714|PEDO-2__Pedobacter_sp__ALS-14_	0	0	0	0	0	0	0	0	0	0	0	0	0	0	0	0	0	0	0	0	0	0	0	0	0	0	0	0	0	0	0	0	0	0	0	0	0	0	0	0	0	0	0	0	0	0	0	0	ARO:1000001 ! process or component of antibiotic biology or chemistry|ARO:3000000 ! determinant of antibiotic resistance|ARO:3000129 ! beta-lactam resistance gene|ARO:3000001 ! beta-lactamase|ARO:3000004 ! class B (metallo-) beta-lactamase|ARO:3000571 ! subclass B3 (metallo-) beta-lactamase
gi|AJP77076|ARO_3003715|PEDO-3__Pedobacter_sp__Stok-3_	0	0	0	0	0	0	0	0	0	0	0	0	0	0	0	0	0	0	0	0	0	0	0	0	0	0	0	0	0	0	0	0	0	0	0	0	0	0	0	0	0	0	0	0	0	0	0	0	ARO:1000001 ! process or component of antibiotic biology or chemistry|ARO:3000000 ! determinant of antibiotic resistance|ARO:3000129 ! beta-lactam resistance gene|ARO:3000001 ! beta-lactamase|ARO:3000004 ! class B (metallo-) beta-lactamase|ARO:3000568 ! subclass B1 (metallo-) beta-lactamase
gi|AJP77080|ARO_3003720|SPG-1__Sphingomonas_sp__ALS-13_	0	0	0	0	0	0	0	0	0	0	0	0	0	0	0	0	0	0	0	0	0	0	0	0	0	0	0	0	0	0	0	0	0	0	0	0	0	0	0	0	0	0	0	0	0	0	0	0	ARO:1000001 ! process or component of antibiotic biology or chemistry|ARO:3000000 ! determinant of antibiotic resistance|ARO:3000129 ! beta-lactam resistance gene|ARO:3000001 ! beta-lactamase|ARO:3000004 ! class B (metallo-) beta-lactamase|ARO:3000571 ! subclass B3 (metallo-) beta-lactamase
gi|AJP77085|ARO_3003717|ESP-1__Epilithonimonas_sp__Stok-2_	0	0	0	0	0	0	0	0	0	0	0	0	0	0	0	0	0	0	0	0	0	0	0	0	0	0	0	0	0	0	0	0	0	0	0	0	0	0	0	0	0	0	0	0	0	0	0	0	ARO:1000001 ! process or component of antibiotic biology or chemistry|ARO:3000000 ! determinant of antibiotic resistance|ARO:3000129 ! beta-lactam resistance gene|ARO:3000001 ! beta-lactamase|ARO:3000004 ! class B (metallo-) beta-lactamase|ARO:3000571 ! subclass B3 (metallo-) beta-lactamase
gi|AKF16168|ARO_3003689|MCR-1__Escherichia_coli_	0	0	0	0	0	0	0	0	0	0	0	0	0	0	0	0	0	0	0	0	0	0	0	0	0	0	0	0	0	0	0	0	0	0	0	0	0	0	0	0	0	0	0	0	0	0	0	0	ARO:1000001 ! process or component of antibiotic biology or chemistry|ARO:3000000 ! determinant of antibiotic resistance|ARO:3002984 ! polymyxin resistance gene
gi|ALU64000|ARO_3003713|VCC-1__Vibrio_cholerae_	0	0	0	0	0	0	0	0	0	0	0	0	0	0	0	0	0	0	0	0	0	0	0	0	0	0	0	0	0	0	0	0	0	0	0	0	0	0	0	0	0	0	0	0	0	0	0	0	ARO:1000001 ! process or component of antibiotic biology or chemistry|ARO:3000000 ! determinant of antibiotic resistance|ARO:3000129 ! beta-lactam resistance gene|ARO:3000001 ! beta-lactamase|ARO:3000078 ! class A beta-lactamase
gi|BAE06005_1|ARO_3003704|mexM__Pseudomonas_aeruginosa_	0	0	0	0	0	0	0	0	0	0	0	0	0	0	0	0	0	0	0	0	0	0	0	0	0	0	0	0	0	0	0	0	0	0	0	0	0	0	0	0	0	0	0	0	0	0	0	0	ARO:1000001 ! process or component of antibiotic biology or chemistry|ARO:3000000 ! determinant of antibiotic resistance|ARO:3000159 ! efflux pump conferring antibiotic resistance|ARO:3000748 ! subunit of efflux pump conferring antibiotic resistance
gi|BAE06006_1|ARO_3003705|mexN__Pseudomonas_aeruginosa_	0	0	0	0	0	0	0	0	0	0	0	0	0	0	0	0	0	0	0	0	0	0	0	0	0	0	0	0	0	0	0	0	0	0	0	0	0	0	0	0	0	0	0	0	0	0	0	0	ARO:1000001 ! process or component of antibiotic biology or chemistry|ARO:3000000 ! determinant of antibiotic resistance|ARO:3000159 ! efflux pump conferring antibiotic resistance|ARO:3000748 ! subunit of efflux pump conferring antibiotic resistance
gi|BAE06007_1|ARO_3003698|mexP__Pseudomonas_aeruginosa_	0	0	0	0	0	0	0	0	0	0	0	0	0	0	0	0	0	0	0	0	0	0	0	0	0	0	0	0	0	0	0	0	0	0	0	0	0	0	0	0	0	0	0	0	0	0	0	0	ARO:1000001 ! process or component of antibiotic biology or chemistry|ARO:3000000 ! determinant of antibiotic resistance|ARO:3000159 ! efflux pump conferring antibiotic resistance|ARO:3000748 ! subunit of efflux pump conferring antibiotic resistance
gi|BAE06008_1|ARO_3003699|mexQ__Pseudomonas_aeruginosa_	0	0	0	0	0	0	0	0	0	0	0	0	0	0	0	0	0	0	0	0	0	0	1.44127	0	0	0	0	0	0	0	0	0	0	0	0	0	0	0	0	0	0	0	0	0	0	0	0	0	ARO:1000001 ! process or component of antibiotic biology or chemistry|ARO:3000000 ! determinant of antibiotic resistance|ARO:3000159 ! efflux pump conferring antibiotic resistance|ARO:3000748 ! subunit of efflux pump conferring antibiotic resistance
gi|BAE06009_1|ARO_3003700|opmE__Pseudomonas_aeruginosa_	0	0	0	0	0	0	0	0	0	0	0	0	0	0	0	0	0	0	0	0	0	0	0	0	0	0	0	0	0	0	0	0	0	0	0	0	0	0	0	0	0	0	0	0	0	0	0	0	ARO:1000001 ! process or component of antibiotic biology or chemistry|ARO:3000000 ! determinant of antibiotic resistance|ARO:3000159 ! efflux pump conferring antibiotic resistance|ARO:3000748 ! subunit of efflux pump conferring antibiotic resistance
gi|BAM46120_1|ARO_3003677|AAC(6äó_)-Iaj__Pseudomonas_aeruginosa_	0	0	0	0	0	0	0	0	0	0	0	0	0	0	0	0	0	0	0	0	0	0	0	0	0	0	0	0	0	0	0	0	0	0	0	0	0	0	0	0	0	0	0	0	0	0	0	0	ARO:1000001 ! process or component of antibiotic biology or chemistry|ARO:3000000 ! determinant of antibiotic resistance|ARO:3000104 ! aminoglycoside resistance gene|ARO:3000121 ! aminoglycoside acetyltransferase (AAC)|ARO:3000345 ! AAC(6')
gi|NP_248846_1|ARO_3003679|TriA__Pseudomonas_aeruginosa_PAO1_	0	0	0	0	0	0	0	0	0	0	0	0	0	0	0	0	0	0	0	0	0	0	0	0	0	0	0	0	0	0	0	0	0	0	0	0	0	0	0	0	0	0	0	0	0	0	0	0	ARO:1000001 ! process or component of antibiotic biology or chemistry|ARO:3000000 ! determinant of antibiotic resistance|ARO:3000159 ! efflux pump conferring antibiotic resistance|ARO:3000748 ! subunit of efflux pump conferring antibiotic resistance
gi|NP_248847_1|ARO_3003680|TriB__Pseudomonas_aeruginosa_PAO1_	0	0	0	0	0	0	0	0	0	0	0	0	0	0	0	0	0	0	0	0	0	0	0	0	0	0	0	0	0	0	0	0	0	0	0	0	0	0	0	0	0	0	0	0	0	0	0	0	ARO:1000001 ! process or component of antibiotic biology or chemistry|ARO:3000000 ! determinant of antibiotic resistance|ARO:3000159 ! efflux pump conferring antibiotic resistance|ARO:3000748 ! subunit of efflux pump conferring antibiotic resistance
gi|NP_248848_1|ARO_3003681|TriC__Pseudomonas_aeruginosa_PAO1_	0	0	0	0	0	0	0	0	0	0	0	0	0	0	0	0	0	0	0	0	0	0	0	0	0	0	0	0	0	0	0	0	0	0	0	0	0	0	0	0	0	0	0	0	0	0	0	0	ARO:1000001 ! process or component of antibiotic biology or chemistry|ARO:3000000 ! determinant of antibiotic resistance|ARO:3000159 ! efflux pump conferring antibiotic resistance|ARO:3000748 ! subunit of efflux pump conferring antibiotic resistance
gi|NP_249820_1|ARO_3000149|FosA__Pseudomonas_aeruginosa_PAO1_	0	0	0	0	0	0	0	0	0	0	0	0	0	0	0	0	0	0	0	0	0	0	0	0	0	0	0	0	0	0	0	0	0	0	0	0	0	0	0	0	0	0	0	0	0	0	0	0	ARO:1000001 ! process or component of antibiotic biology or chemistry|ARO:3000000 ! determinant of antibiotic resistance|ARO:3000271 ! fosfomycin resistance gene|ARO:3000342 ! fosfomycin inactivation enzyme|ARO:3000133 ! fosfomycin thiol transferase
gi|NP_252244|ARO_3002985|arnA__Pseudomonas_aeruginosa_PAO1_	0	0	0	0	0	0	0	0	0	0	0	0	0	0	0	0	0	0	0	0	0	0	0	0	0	0	0	0	0	0	0	0	0	0	0	0	0	0	0	0	0	0	0	0	0	0	0	0	ARO:1000001 ! process or component of antibiotic biology or chemistry|ARO:3000000 ! determinant of antibiotic resistance|ARO:3002984 ! polymyxin resistance gene
gi|NP_252367_1|ARO_3003692|mexJ__Pseudomonas_aeruginosa_PAO1_	0	0	0	0	0	0	0	0	0	0	0	0	0	0	0	0	0	0	0	0	0	0	0	0	0	0	0	0	0	0	0	0	0	0	0	0	0	0	0	0	0	0	0	0	0	0	0	0	ARO:1000001 ! process or component of antibiotic biology or chemistry|ARO:3000000 ! determinant of antibiotic resistance|ARO:3000159 ! efflux pump conferring antibiotic resistance|ARO:3000748 ! subunit of efflux pump conferring antibiotic resistance
gi|NP_252368_1|ARO_3003710|mexL__Pseudomonas_aeruginosa_PAO1_	0	0	0	0	0	0	0	0	0	0	0	0	0	0	0	0	0	0	0	0	0	0	0	0	0	0	0	0	0	0	0	0	0	0	0	0	0	0	0	0	0	0	0	0	0	0	0	0	ARO:1000001 ! process or component of antibiotic biology or chemistry|ARO:3000000 ! determinant of antibiotic resistance|ARO:3000451 ! gene modulating antibiotic efflux
gi|NP_253661_1|ARO_3003682|OpmH__Pseudomonas_aeruginosa_PAO1_	0	0	0	0	0	0	0	0	0	0	0	0	0	0	0	0	0	0	0	0	0	0	0	0	0	0	0	0	0	0	0	0	0	0	0	0	0	0	0	0	0	0	0	0	0	0	0	0	ARO:1000001 ! process or component of antibiotic biology or chemistry|ARO:3000000 ! determinant of antibiotic resistance|ARO:3000159 ! efflux pump conferring antibiotic resistance|ARO:3000748 ! subunit of efflux pump conferring antibiotic resistance
gi|NP_253677_1|ARO_3000264|emrE__Pseudomonas_aeruginosa_PAO1_	0	0	0	0	0	0	0	0	0	0	0	0	0	0	0	0	0	0	0	0	0	0	0	0	0	0	0	0	0	0	0	0	0	0	0	0	0	0	0	0	0	0	0	0	0	0	0	0	ARO:1000001 ! process or component of antibiotic biology or chemistry|ARO:3000000 ! determinant of antibiotic resistance|ARO:3000159 ! efflux pump conferring antibiotic resistance|ARO:0010003 ! small multidrug resistance (SMR) antibiotic efflux pump
gi|NP_627787|ARO_3002914|vanJ__Streptomyces_coelicolor_A3(2)_	0	0	0	0	0	0	0	0	0	0	0	0	0	0	0	0	0	0	0	0	0	0	0	0	0	0	0	0	0	0	0	0	0	0	0	0	0	0	0	0	0	0	0	0	0	0	0	0	ARO:1000001 ! process or component of antibiotic biology or chemistry|ARO:3000000 ! determinant of antibiotic resistance|ARO:3000012 ! gene conferring antibiotic resistance via molecular bypass|ARO:3002976 ! gene associated with a glycopeptide resistance cluster
[truncated: 5 more columns]
